# Supplementary material for: Development of ruthenium complexes with S-donor ligands for application in synthesis, catalytic acceptorless alcohol dehydrogenation and crossed-aldol condensation
Source: Royal Society of Chemistry journal article supplement (doi:10.1039/d4dt00985a), 2024-01-01
Supplement: d4dt00985a1.pdf [file d4dt00985a1.pdf]

## **†Electronic supplementary information (ESI)**

### **Development of ruthenium complexes with S-donor ligands for application in synthesis and, catalytic acceptorless alcohol dehydrogenation and crossed-aldol condensation†**

Anushri Chandra,<sup>a</sup> Pousali Basu,<sup>a</sup> Shreya Raha,<sup>a,§</sup> Papu Dhibar<sup>a,b</sup> and Samaresh Bhattacharya<sup>\*a</sup>

<sup>a</sup> *Department of Chemistry, Inorganic Chemistry Section, Jadavpur University, Kolkata - 700 032, India. E-mail: samareshb.chemistry@jadavpuruniversity.in*

<sup>b</sup> *Department of Chemistry, Brainware University, Kolkata 700 125, India*

**Contents:**

|              |                                                                                                                                                                                                                                                                                                                                                                           |           |
|--------------|---------------------------------------------------------------------------------------------------------------------------------------------------------------------------------------------------------------------------------------------------------------------------------------------------------------------------------------------------------------------------|-----------|
| Fig. S1      | DFT-optimized structures of the <i>trans</i> and <i>cis</i> isomers of [Ru(L <sup>2</sup> ) <sub>2</sub> (dmsO) <sub>2</sub> ], and the energy difference ( $\Delta E$ ) between them.                                                                                                                                                                                    | Pg. 3     |
| Fig. S2      | DFT-optimized structures of the <i>trans</i> and <i>cis</i> isomers of [Ru(L <sup>3</sup> ) <sub>2</sub> (dmsO) <sub>2</sub> ], and the energy difference ( $\Delta E$ ) between them.                                                                                                                                                                                    | Pg. 3     |
| Fig. S3      | DFT-optimized structures of the <i>trans</i> and <i>cis</i> isomers of [Ru(L <sup>4</sup> ) <sub>2</sub> (dmsO) <sub>2</sub> ], and the energy difference ( $\Delta E$ ) between them.                                                                                                                                                                                    | Pg. 4     |
| Fig. S4      | Molecular structure of [Ru(L <sup>1</sup> ) <sub>2</sub> (dmsO) <sub>2</sub> ] showing the disordered methyl carbons.                                                                                                                                                                                                                                                     | Pg. 5     |
| Fig. S5      | Molecular structure of [Ru(L <sup>2</sup> ) <sub>2</sub> (dmsO) <sub>2</sub> ].                                                                                                                                                                                                                                                                                           | Pg. 6     |
| Table S1     | Selected bond distances and bond angles for [Ru(L <sup>2</sup> ) <sub>2</sub> (dmsO) <sub>2</sub> ]                                                                                                                                                                                                                                                                       | Pg. 6     |
| Fig. S6      | Molecular structure of [Ru(L <sup>3</sup> ) <sub>2</sub> (dmsO) <sub>2</sub> ].                                                                                                                                                                                                                                                                                           | Pg. 7     |
| Table S2     | Selected bond distances and bond angles for [Ru(L <sup>3</sup> ) <sub>2</sub> (dmsO) <sub>2</sub> ]                                                                                                                                                                                                                                                                       | Pg. 7     |
| Fig. S7      | Molecular structure of [Ru(L <sup>4</sup> ) <sub>2</sub> (dmsO) <sub>2</sub> ] showing the disordered central carbons of the <i>tert</i> -butyl groups.                                                                                                                                                                                                                   | Pg. 8     |
| Table S3     | Selected bond distances and bond angles for [Ru(L <sup>4</sup> ) <sub>2</sub> (dmsO) <sub>2</sub> ]                                                                                                                                                                                                                                                                       | Pg. 8     |
| Fig. S8      | Intermolecular C-H $\cdots$ S and C-H $\cdots$ O interactions in the lattice of [Ru(L <sup>3</sup> ) <sub>2</sub> (dmsO) <sub>2</sub> ].                                                                                                                                                                                                                                  | Pg. 9     |
| Table S4     | Selected bond distances and bond angles for [Ru(L <sup>3</sup> ) <sub>2</sub> (bpy)]                                                                                                                                                                                                                                                                                      | Pg. 10    |
| Fig. S9      | DFT-optimized structure of [Ru(L <sup>2</sup> ) <sub>2</sub> (phen)]                                                                                                                                                                                                                                                                                                      | Pg. 11    |
| Table S5     | Some computed bond distances and bond angles for [Ru(L <sup>2</sup> ) <sub>2</sub> (phen)]                                                                                                                                                                                                                                                                                | Pg. 11    |
| Table S6-S17 | Computed parameters from TDDFT calculations on [Ru(L <sup>n</sup> ) <sub>2</sub> (dmsO) <sub>2</sub> ] (n = 1-4), [Ru(L <sup>3</sup> ) <sub>2</sub> (bpy)] and [Ru(L <sup>2</sup> ) <sub>2</sub> (phen)] for electronic spectral properties in dichloromethane solution & compositions of selected molecular orbitals associated with the electronic spectral transitions | Pg. 12-31 |
| Fig. S10-S15 | Contour plots of the molecular orbitals associated with the electronic spectral transitions.                                                                                                                                                                                                                                                                              |           |
| Table S18    | Optimization of the reaction conditions for the catalysis                                                                                                                                                                                                                                                                                                                 | Pg. 32    |
| Fig. S16     | <sup>1</sup> H NMR spectrum of trapped H <sub>2</sub> .                                                                                                                                                                                                                                                                                                                   | Pg. 33    |
| Table S19    | Comparison of different catalysts for the acceptorless alcohol dehydrogenation                                                                                                                                                                                                                                                                                            | Pg. 34    |
| Chart S1     | Characterization data of <b>P</b> <sub>1</sub> – <b>P</b> <sub>16</sub> and <b>P</b> <sub>18</sub> – <b>P</b> <sub>20</sub>                                                                                                                                                                                                                                               | Pg. 35-58 |
| Fig. S17     | Molecular structure of 1,5-bis-(4-methoxyphenyl)-penta-1,4-( <i>E,E</i> )-dien-3-one ( <b>P</b> <sub>2</sub> ).                                                                                                                                                                                                                                                           | Pg. 59    |
| Table S20    | Selected bond distances and bond angles for <b>P</b> <sub>2</sub>                                                                                                                                                                                                                                                                                                         | Pg. 59    |
| Table S21    | Comparison of different catalysts for the crossed-aldol reactions                                                                                                                                                                                                                                                                                                         | Pg. 60    |
| Table S22    | Crystallographic data for [Ru(L <sup>1</sup> ) <sub>2</sub> (dmsO) <sub>2</sub> ] and [Ru(L <sup>2</sup> ) <sub>2</sub> (dmsO) <sub>2</sub> ]                                                                                                                                                                                                                             | Pg. 61    |
| Table S23    | Crystallographic data for [Ru(L <sup>3</sup> ) <sub>2</sub> (dmsO) <sub>2</sub> ] and [Ru(L <sup>4</sup> ) <sub>2</sub> (dmsO) <sub>2</sub> ]                                                                                                                                                                                                                             | Pg. 62    |
| Table S24    | Crystallographic data for [Ru(L <sup>3</sup> ) <sub>2</sub> (bpy)] and <b>P</b> <sub>2</sub>                                                                                                                                                                                                                                                                              | Pg. 63    |

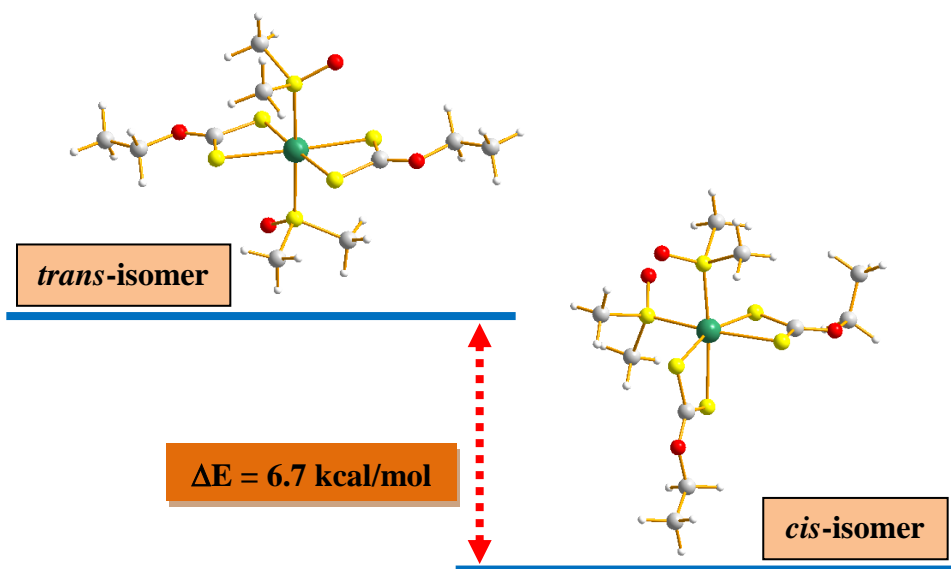

**Fig. S1** DFT-optimized structures of the *trans* and *cis* isomers of  $[\text{Ru}(\text{L}^2)_2(\text{dmsO})_2]$ , and the energy difference ( $\Delta E$ ) between them.

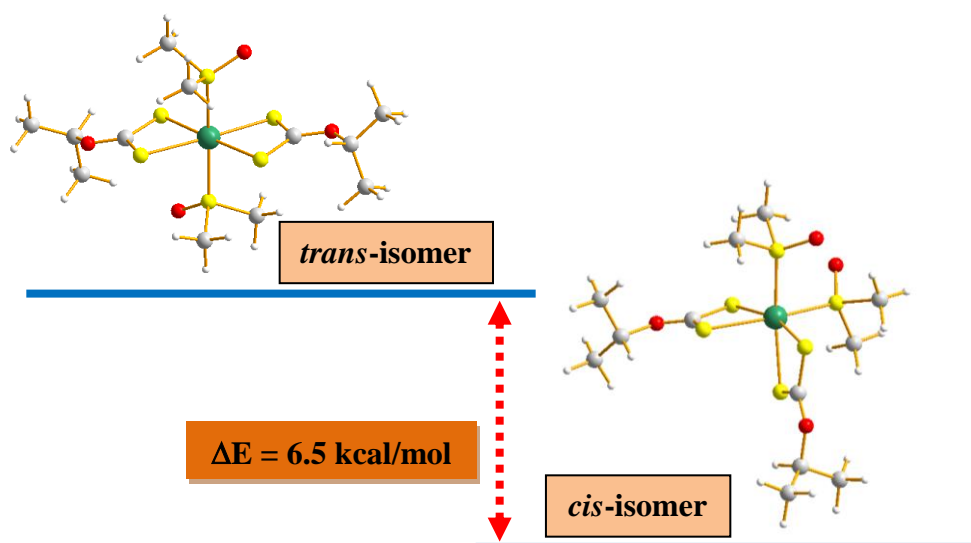

**Fig. S2** DFT-optimized structures of the *trans* and *cis* isomers of  $[\text{Ru}(\text{L}^3)_2(\text{dmsO})_2]$ , and the energy difference ( $\Delta E$ ) between them.

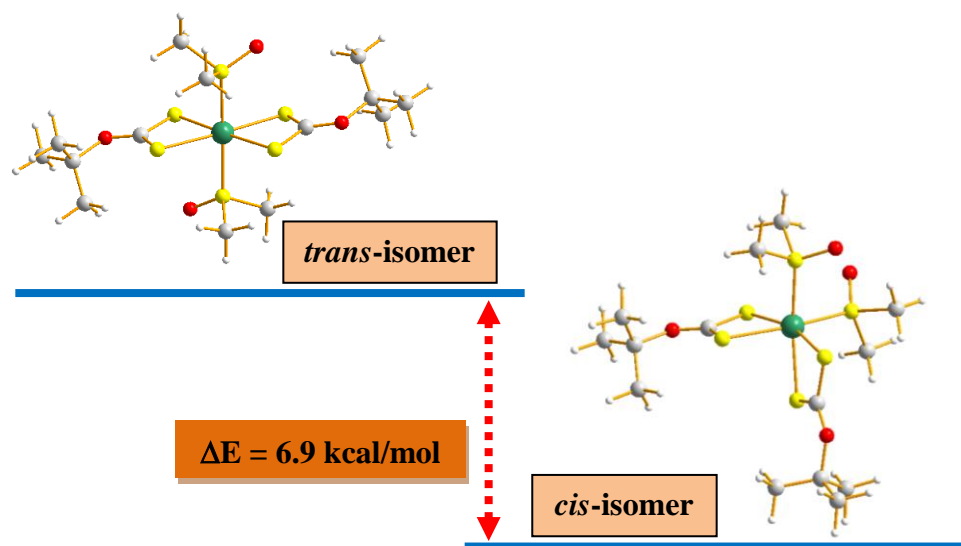

**Fig. S3** DFT-optimized structures of the *trans* and *cis* isomers of [Ru(L<sup>4</sup>)<sub>2</sub>(dmsO)<sub>2</sub>], and the energy difference ( $\Delta E$ ) between them.

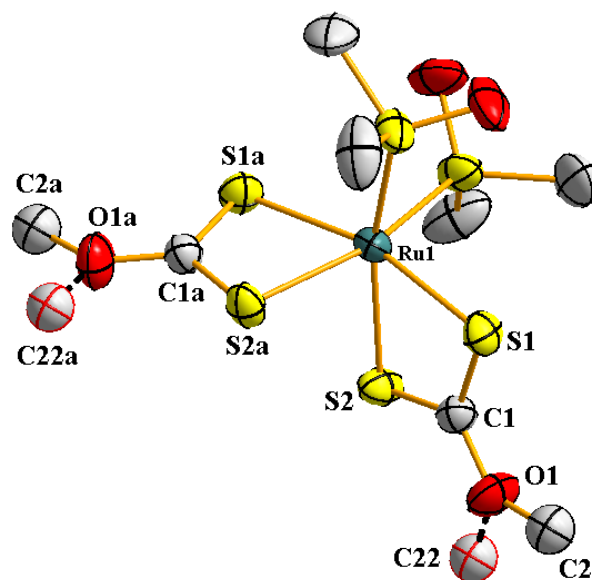

**Fig. S4** Molecular structure of [Ru(L<sup>1</sup>)<sub>2</sub>(dmsO)<sub>2</sub>] showing the disordered methyl carbons (C2, C22 and C2a, C22a).

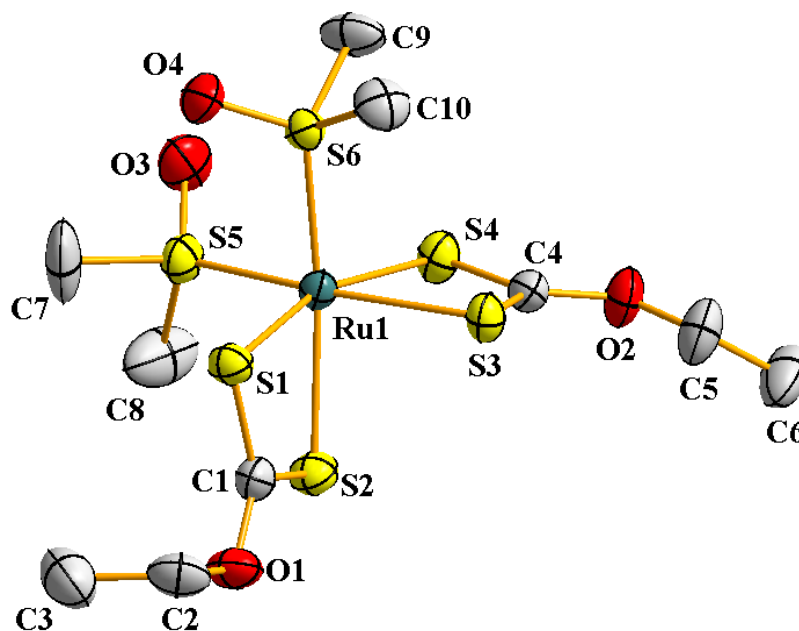

**Fig. S5** Molecular structure of  $[\text{Ru}(\text{L}^2)_2(\text{dmsO})_2]$ .

**Table S1** Selected bond distances and bond angles for  $[\text{Ru}(\text{L}^2)_2(\text{dmsO})_2]$

| Bond distances (Å) |            |           |          |
|--------------------|------------|-----------|----------|
| Ru1-S1             | 2.3904(9)  | C4-S3     | 1.684(4) |
| Ru1-S2             | 2.4441(11) | C4-S4     | 1.690(3) |
| Ru1-S3             | 2.4337(11) | S5-O3     | 1.473(3) |
| Ru1-S4             | 2.3977(10) | S6-O4     | 1.478(3) |
| Ru1-S5             | 2.2602(11) | C1-O1     | 1.320(4) |
| Ru1-S6             | 2.2592(10) | C2-O1     | 1.457(4) |
| C1-S1              | 1.696(4)   | C4-O2     | 1.329(4) |
| C1-S2              | 1.688(4)   | C5-O2     | 1.455(5) |
| Bond angles (°)    |            |           |          |
| S1-Ru1-S4          | 162.82(4)  | S1-Ru1-S2 | 72.15(3) |
| S2-Ru1-S6          | 166.61(3)  | S3-Ru1-S4 | 72.29(3) |
| S3-Ru1-S5          | 166.72(4)  |           |          |

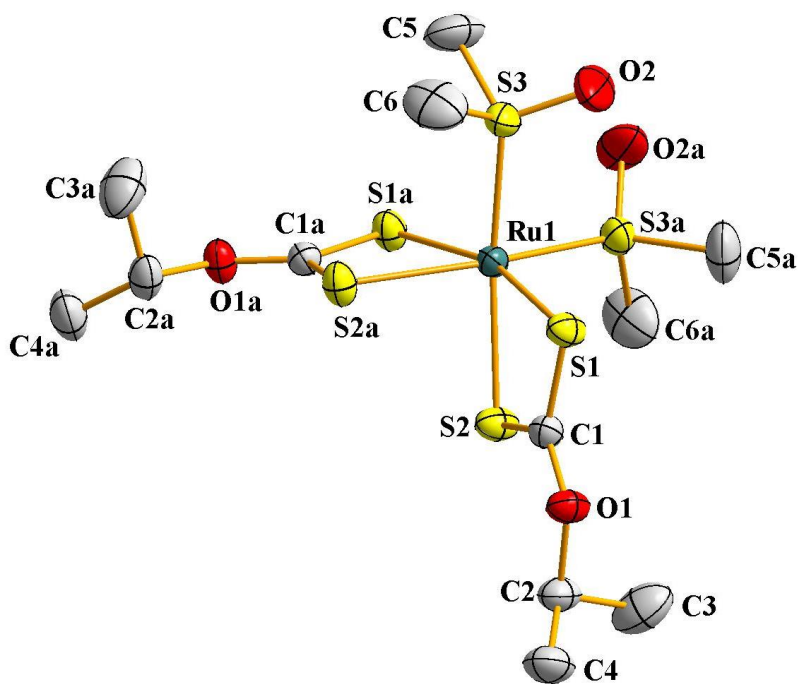

**Fig. S6** Molecular structure of  $[\text{Ru}(\text{L}^3)_2(\text{dmsO})_2]$ .

**Table S2** Selected bond distances and bond angles for  $[\text{Ru}(\text{L}^3)_2(\text{dmsO})_2]$

| Bond distances (Å) |           |             |            |
|--------------------|-----------|-------------|------------|
| Ru1-S1             | 2.4028(5) | C1-S1       | 1.6946(19) |
| Ru1-S2             | 2.4232(6) | C1-S2       | 1.698(2)   |
| Ru1-S3             | 2.2577(6) | C1-O1       | 1.315(2)   |
| S3-O2              | 1.474(2)  | C2-O1       | 1.473(3)   |
| Bond angles (°)    |           |             |            |
| S1-Ru1-S1a         | 162.96(2) | S2a-Ru1-S3a | 166.08(2)  |
| S2-Ru1-S3          | 166.08(2) | S1-Ru1-S2   | 72.34(2)   |

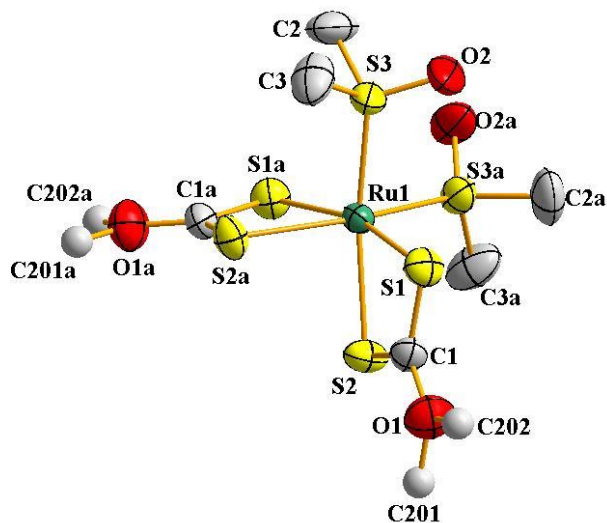

**Fig. S7** Molecular structure of  $[\text{Ru}(\text{L}^4)_2(\text{dmsO})_2]$  showing the disordered central carbons of the *tert*-butyl groups (C201, C202 and C201a, C202a). The other three carbons of the *tert*-butyl groups are not shown, as they suffer from heavy disorder problem.

**Table S3** Selected bond distances and bond angles for  $[\text{Ru}(\text{L}^4)_2(\text{dmsO})_2]$

| Bond distances (Å) |            |           |           |
|--------------------|------------|-----------|-----------|
| Ru1-S1             | 2.3865(11) | C1-S1     | 1.682(4)  |
| Ru1-S2             | 2.4449(13) | C1-S2     | 1.685(5)  |
| Ru1-S3             | 2.2532(13) | C1-O1     | 1.343(6)  |
| S3-O2              | 1.476(4)   |           |           |
| Bond angles (°)    |            |           |           |
| S1-Ru1-S1a         | 164.15(38) | S1-Ru1-S2 | 71.99(40) |
| S2-Ru1-S3          | 164.22(43) |           |           |



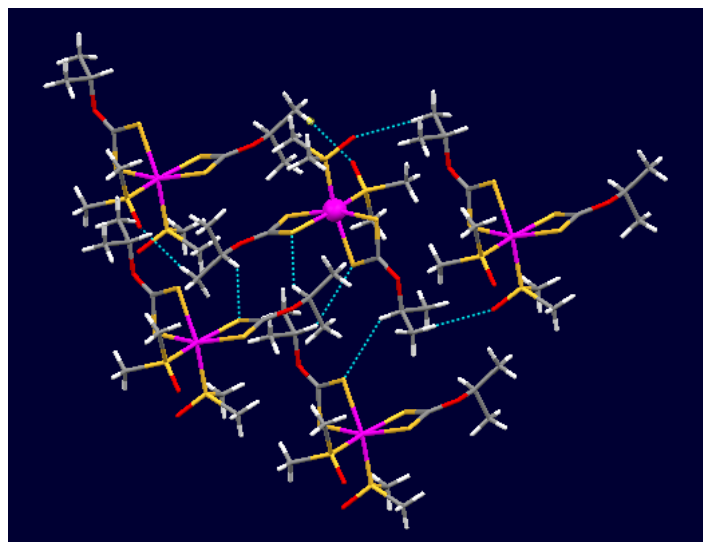

**Fig. S8** Intermolecular C-H...S and C-H...O interactions in the lattice of [Ru(L<sup>3</sup>)<sub>2</sub>(dmsO)<sub>2</sub>].

**Table S4** Selected bond distances and bond angles for [Ru(L<sup>3</sup>)<sub>2</sub>(bpy)]

| Bond distances (Å) |           |           |          |
|--------------------|-----------|-----------|----------|
| Ru1-S1             | 2.3935(9) | C5-O2     | 1.315(5) |
| Ru1-S2             | 2.3904(7) | C1-S1     | 1.693(3) |
| Ru1-S3             | 2.395(1)  | C1-S2     | 1.683(4) |
| Ru1-S4             | 2.3912(7) | C1-O1     | 1.328(5) |
| Ru1-N1             | 2.055(2)  | C2-O1     | 1.476(5) |
| Ru1-N2             | 2.061(2)  | C2-C3     | 1.502(7) |
| C5-S3              | 1.695(3)  | C2-C4     | 1.490(6) |
| C5-S4              | 1.683(4)  |           |          |
| Bond angles (°)    |           |           |          |
| S1-Ru1-S3          | 163.79(3) | S1-Ru1-S2 | 72.60(3) |
| S2-Ru1-N1          | 174.08(7) | S3-Ru1-S4 | 72.60(3) |
| S4-Ru1-N2          | 171.97(3) | N1-Ru1-N2 | 78.28(8) |

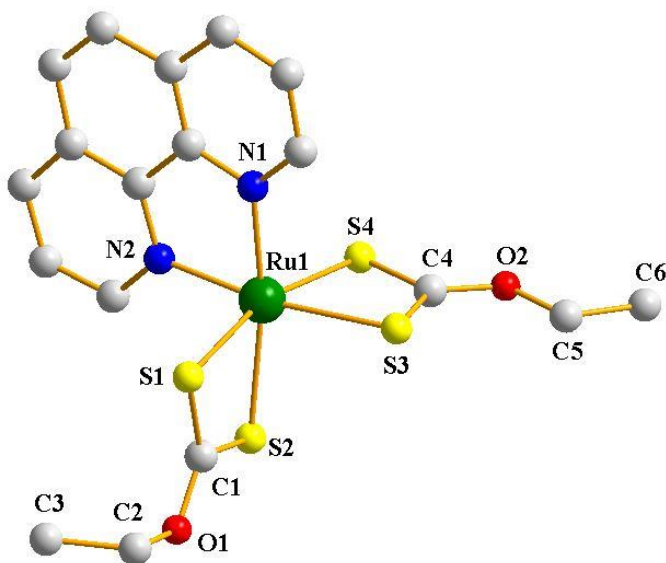

**Fig. S9** DFT-optimized structure of  $[\text{Ru}(\text{L}^2)_2(\text{phen})]$ .

**Table S5** Some computed bond distances and bond angles for  $[\text{Ru}(\text{L}^2)_2(\text{phen})]$

| Bond distances (Å) |         |           |        |
|--------------------|---------|-----------|--------|
| Ru1-S1             | 2.4812  | C1-S1     | 1.7164 |
| Ru1-S2             | 2.4810  | C1-S2     | 1.7052 |
| Ru1-S3             | 2.4846  | C1-O1     | 1.3305 |
| Ru1-S4             | 2.4702  | C2-O1     | 1.4486 |
| Ru1-N1             | 2.0970  | C4-S3     | 1.7106 |
| Ru1-N2             | 2.0929  | C4-S4     | 1.7084 |
|                    |         | C4-O2     | 1.3295 |
|                    |         | C5-O2     | 1.4465 |
| Bond angles (°)    |         |           |        |
| S1-Ru1-S4          | 163.523 | S1-Ru1-S2 | 71.737 |
| S2-Ru1-N1          | 169.983 | S3-Ru1-S4 | 71.879 |
| S3-Ru1-N2          | 169.517 | N1-Ru1-N2 | 78.965 |

**Table S6** Computed parameters from TDDFT calculations on  $[\text{Ru}(\text{L}^1)_2(\text{dmsO})_2]$  for electronic spectral properties in dichloromethane solution

| Excited State | Composition            | CI value | $E$ (eV) | Oscillator strength ( $f$ ) | $\lambda_{\text{theo}}$ (nm) | Assignment | $\lambda_{\text{exp}}$ (nm) |
|---------------|------------------------|----------|----------|-----------------------------|------------------------------|------------|-----------------------------|
| 9             | H-1 $\rightarrow$ L    | 0.54398  | 3.7074   | 0.0151                      | 334.43                       | MLCT/LLCT  | 346                         |
|               | H-1 $\rightarrow$ L+1  | 0.28212  |          |                             |                              | MLCT/LLCT  |                             |
|               | H $\rightarrow$ L      | 0.15373  |          |                             |                              | MLCT/LLCT  |                             |
|               | H $\rightarrow$ L+1    | 0.26411  |          |                             |                              | MLCT/LLCT  |                             |
| 26            | H-7 $\rightarrow$ L+2  | 0.20556  | 5.0205   | 0.1389                      | 246.95                       | LMCT/LLCT  | 284                         |
|               | H-7 $\rightarrow$ L+3  | 0.17035  |          |                             |                              | LMCT/LLCT  |                             |
|               | H-6 $\rightarrow$ L+2  | 0.50223  |          |                             |                              | LMCT/LLCT  |                             |
|               | H-5 $\rightarrow$ L+2  | 0.29678  |          |                             |                              | LMCT       |                             |
|               | H-3 $\rightarrow$ L+3  | 0.14770  |          |                             |                              | LMCT       |                             |
|               | H $\rightarrow$ L+2    | 0.11650  |          |                             |                              | LLCT /LMCT |                             |
| 74            | H-13 $\rightarrow$ L+3 | 0.20601  | 6.3603   | 0.0985                      | 194.94                       | LMCT/LLCT  | 236                         |
|               | H-3 $\rightarrow$ L+4  | 0.21991  |          |                             |                              | LMCT       |                             |
|               | H-2 $\rightarrow$ L+7  | 0.13528  |          |                             |                              | LMCT       |                             |
|               | H-1 $\rightarrow$ L+8  | 0.10349  |          |                             |                              | MLCT/LLCT  |                             |
|               | H-1 $\rightarrow$ L+9  | 0.15416  |          |                             |                              | MLCT/LLCT  |                             |
|               | H-1 $\rightarrow$ L+12 | 0.10071  |          |                             |                              | MLCT/LLCT  |                             |
|               | H $\rightarrow$ L+11   | 0.50848  |          |                             |                              | MLCT/LLCT  |                             |

**Table S7** Compositions of selected molecular orbitals of  $[\text{Ru}(\text{L}^1)_2(\text{dmsO})_2]$  associated with the electronic spectral transitions

| % Contribution of fragments to | Fragments |                    |                    |          |          |
|--------------------------------|-----------|--------------------|--------------------|----------|----------|
|                                | Ru        | L <sup>1</sup> (1) | L <sup>1</sup> (2) | DMSO (1) | DMSO (2) |
| HOMO (H)                       | 50        | 8                  | 38                 | 1        | 3        |
| H-1                            | 50        | 38                 | 7                  | 3        | 2        |
| H-2                            | 66        | 17                 | 12                 | 3        | 2        |
| H-3                            | 7         | 36                 | 34                 | 10       | 13       |
| H-5                            | 7         | 15                 | 17                 | 31       | 30       |
| H-6                            | 27        | 14                 | 31                 | 8        | 20       |
| H-7                            | 30        | 26                 | 18                 | 21       | 5        |
| H-13                           | 21        | 37                 | 38                 | 2        | 2        |
| LUMO (L)                       | 6         | 58                 | 35                 | 0        | 1        |
| L+1                            | 4         | 35                 | 60                 | 0        | 1        |
| L+2                            | 53        | 11                 | 16                 | 13       | 7        |
| L+3                            | 52        | 24                 | 17                 | 1        | 6        |
| L+4                            | 87        | 0                  | 0                  | 6        | 7        |
| L+7                            | 91        | 3                  | 3                  | 3        | 0        |
| L+8                            | 11        | 30                 | 6                  | 32       | 21       |
| L+9                            | 23        | 1                  | 18                 | 21       | 37       |
| L+11                           | 13        | 42                 | 4                  | 39       | 2        |
| L+12                           | 9         | 11                 | 19                 | 31       | 30       |

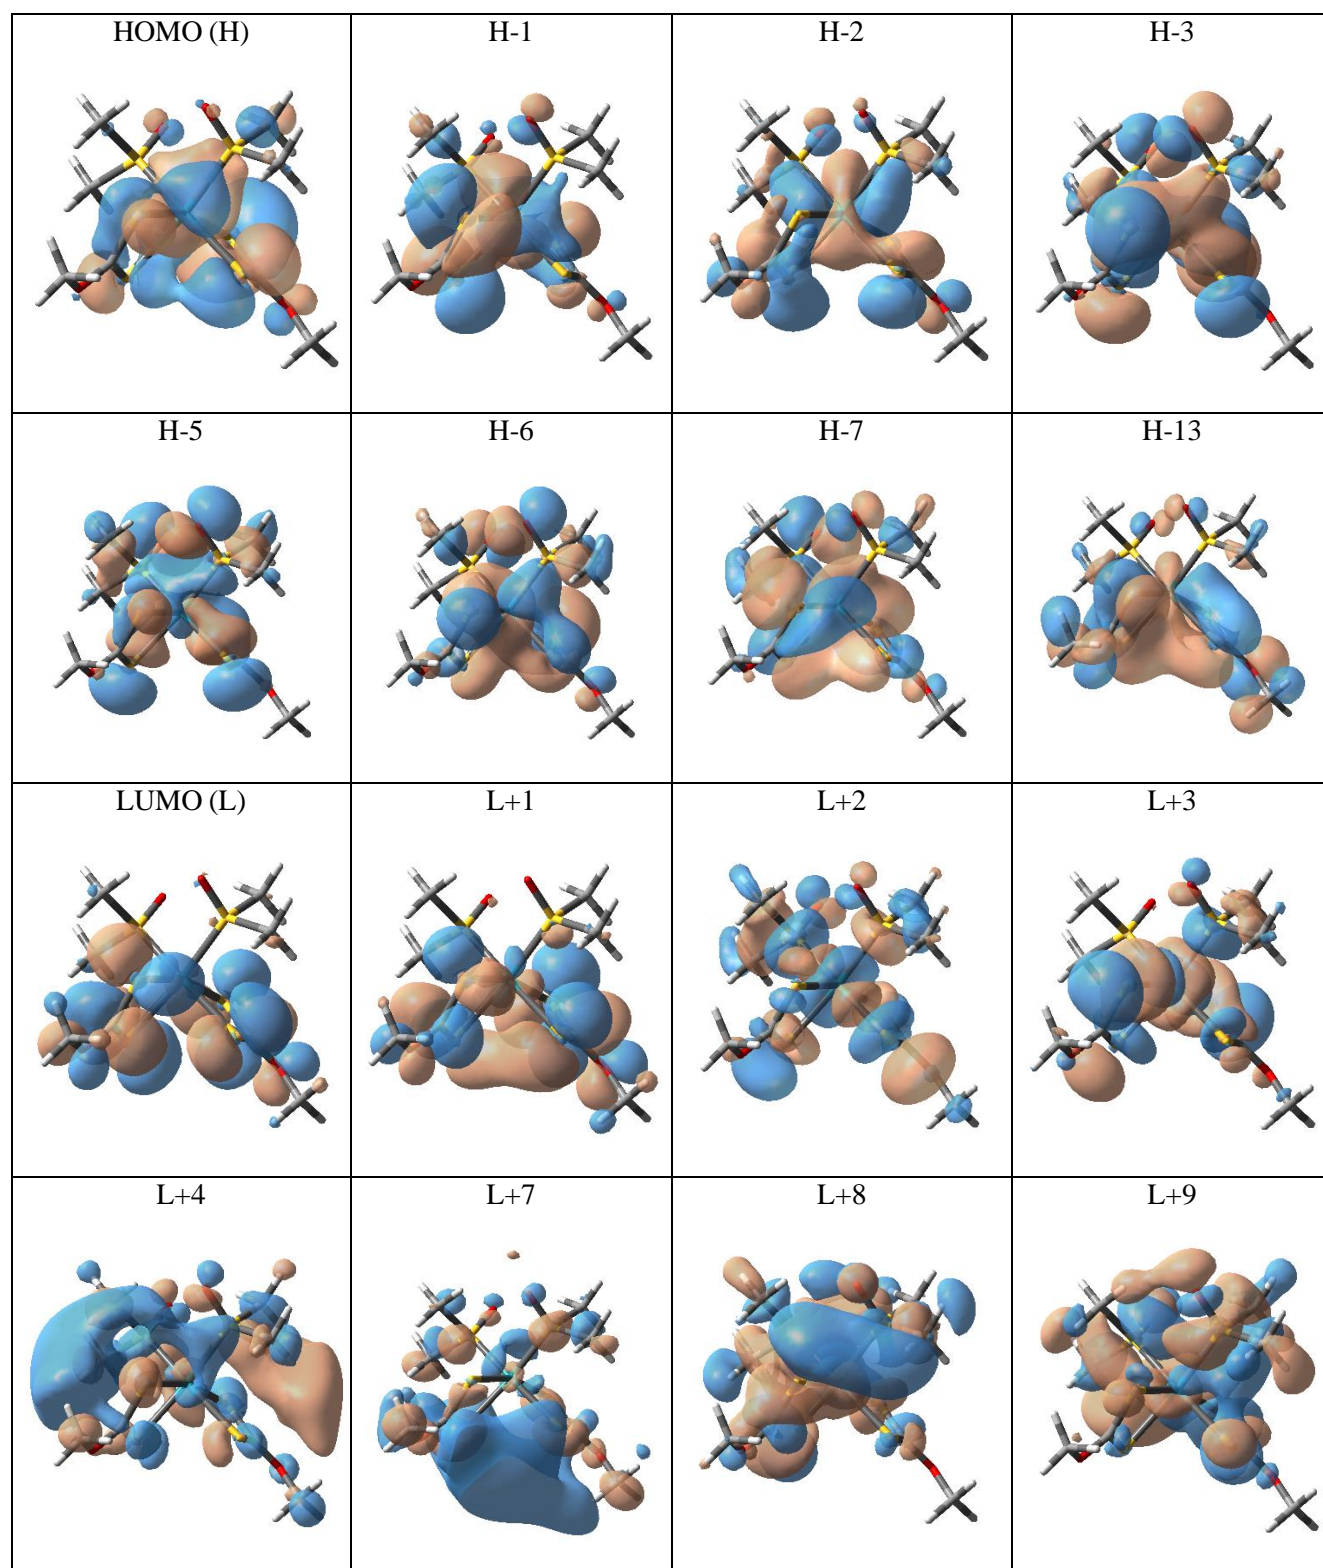

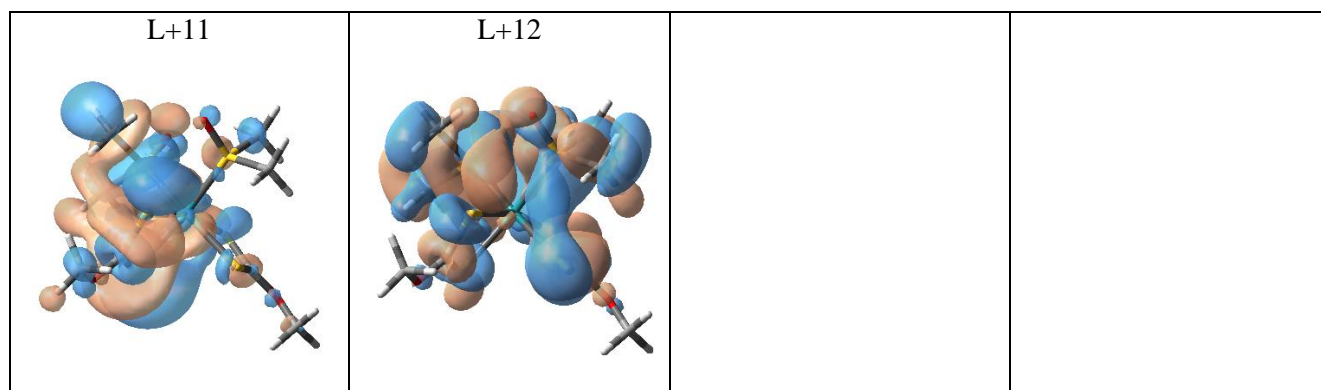

**Fig. S10** Contour plots of the molecular orbitals of  $[\text{Ru}(\text{L}^1)_2(\text{dmsol})_2]$ , which are associated with the electronic spectral transitions (See **Table S6**).

**Table S8** Computed parameters from TDDFT calculations on  $[\text{Ru}(\text{L}^2)_2(\text{dmsO})_2]$  for electronic spectral properties in dichloromethane solution

| Excited State | Composition            | CI value | $E$ (eV) | Oscillator strength ( $f$ ) | $\lambda_{\text{theo}}$ (nm) | Assignment | $\lambda_{\text{exp}}$ (nm) |
|---------------|------------------------|----------|----------|-----------------------------|------------------------------|------------|-----------------------------|
| 9             | H-1 $\rightarrow$ L    | 0.60432  | 3.7162   | 0.0160                      | 333.64                       | MLCT/LLCT  | 347                         |
|               | H-1 $\rightarrow$ L+1  | 0.14342  |          |                             |                              | MLCT/LLCT  |                             |
|               | H $\rightarrow$ L+1    | 0.27974  |          |                             |                              | MLCT/LLCT  |                             |
| 26            | H-7 $\rightarrow$ L+2  | 0.25423  | 5.0233   | 0.1430                      | 246.82                       | LMCT/LLCT  | 285                         |
|               | H-7 $\rightarrow$ L+3  | 0.13889  |          |                             |                              | LMCT/LLCT  |                             |
|               | H-6 $\rightarrow$ L+2  | 0.48971  |          |                             |                              | LMCT/LLCT  |                             |
|               | H-3 $\rightarrow$ L+3  | 0.14097  |          |                             |                              | LMCT       |                             |
|               | H $\rightarrow$ L+2    | 0.12147  |          |                             |                              | LLCT/LMCT  |                             |
| 72            | H-13 $\rightarrow$ L+1 | 0.11096  | 6.3243   | 0.1163                      | 196.04                       | MLCT/LLCT  | 237                         |
|               | H-13 $\rightarrow$ L+3 | 0.21573  |          |                             |                              | LMCT/LLCT  |                             |
|               | H-12 $\rightarrow$ L+2 | 0.17009  |          |                             |                              | LMCT/LLCT  |                             |
|               | H-4 $\rightarrow$ L+4  | 0.20482  |          |                             |                              | LMCT/LLCT  |                             |
|               | H-3 $\rightarrow$ L+4  | 0.30120  |          |                             |                              | LMCT       |                             |
|               | H-2 $\rightarrow$ L+7  | 0.17294  |          |                             |                              | LMCT       |                             |
|               | H-2 $\rightarrow$ L+8  | 0.22678  |          |                             |                              | MLCT/LLCT  |                             |
|               | H-1 $\rightarrow$ L+9  | 0.26937  |          |                             |                              | MLCT/LLCT  |                             |
|               | H-1 $\rightarrow$ L+10 | 0.18582  |          |                             |                              | MLCT/LLCT  |                             |



**Table S9** Compositions of selected molecular orbitals of  $[\text{Ru}(\text{L}^2)_2(\text{dmsO})_2]$  associated with the electronic spectral transitions

| % Contribution of fragments to | Fragments |                  |                  |          |          |
|--------------------------------|-----------|------------------|------------------|----------|----------|
|                                | Ru        | $\text{L}^2$ (1) | $\text{L}^2$ (2) | DMSO (1) | DMSO (2) |
| HOMO (H)                       | 50        | 9                | 37               | 1        | 3        |
| H-1                            | 50        | 37               | 9                | 2        | 2        |
| H-2                            | 65        | 18               | 12               | 3        | 2        |
| H-3                            | 9         | 37               | 34               | 8        | 12       |
| H-4                            | 17        | 36               | 37               | 5        | 5        |
| H-6                            | 26        | 14               | 30               | 9        | 21       |
| H-7                            | 31        | 27               | 18               | 20       | 4        |
| H-12                           | 28        | 24               | 29               | 11       | 8        |
| H-13                           | 21        | 34               | 41               | 2        | 2        |
| LUMO (L)                       | 6         | 62               | 31               | 0        | 1        |
| L+1                            | 4         | 32               | 64               | 0        | 0        |
| L+2                            | 53        | 10               | 16               | 14       | 7        |
| L+3                            | 52        | 24               | 17               | 1        | 6        |
| L+4                            | 86        | 1                | 0                | 6        | 7        |
| L+7                            | 92        | 0                | 6                | 2        | 0        |
| L+8                            | 11        | 25               | 5                | 36       | 23       |
| L+9                            | 24        | 1                | 15               | 23       | 37       |
| L+10                           | 11        | 12               | 36               | 8        | 33       |

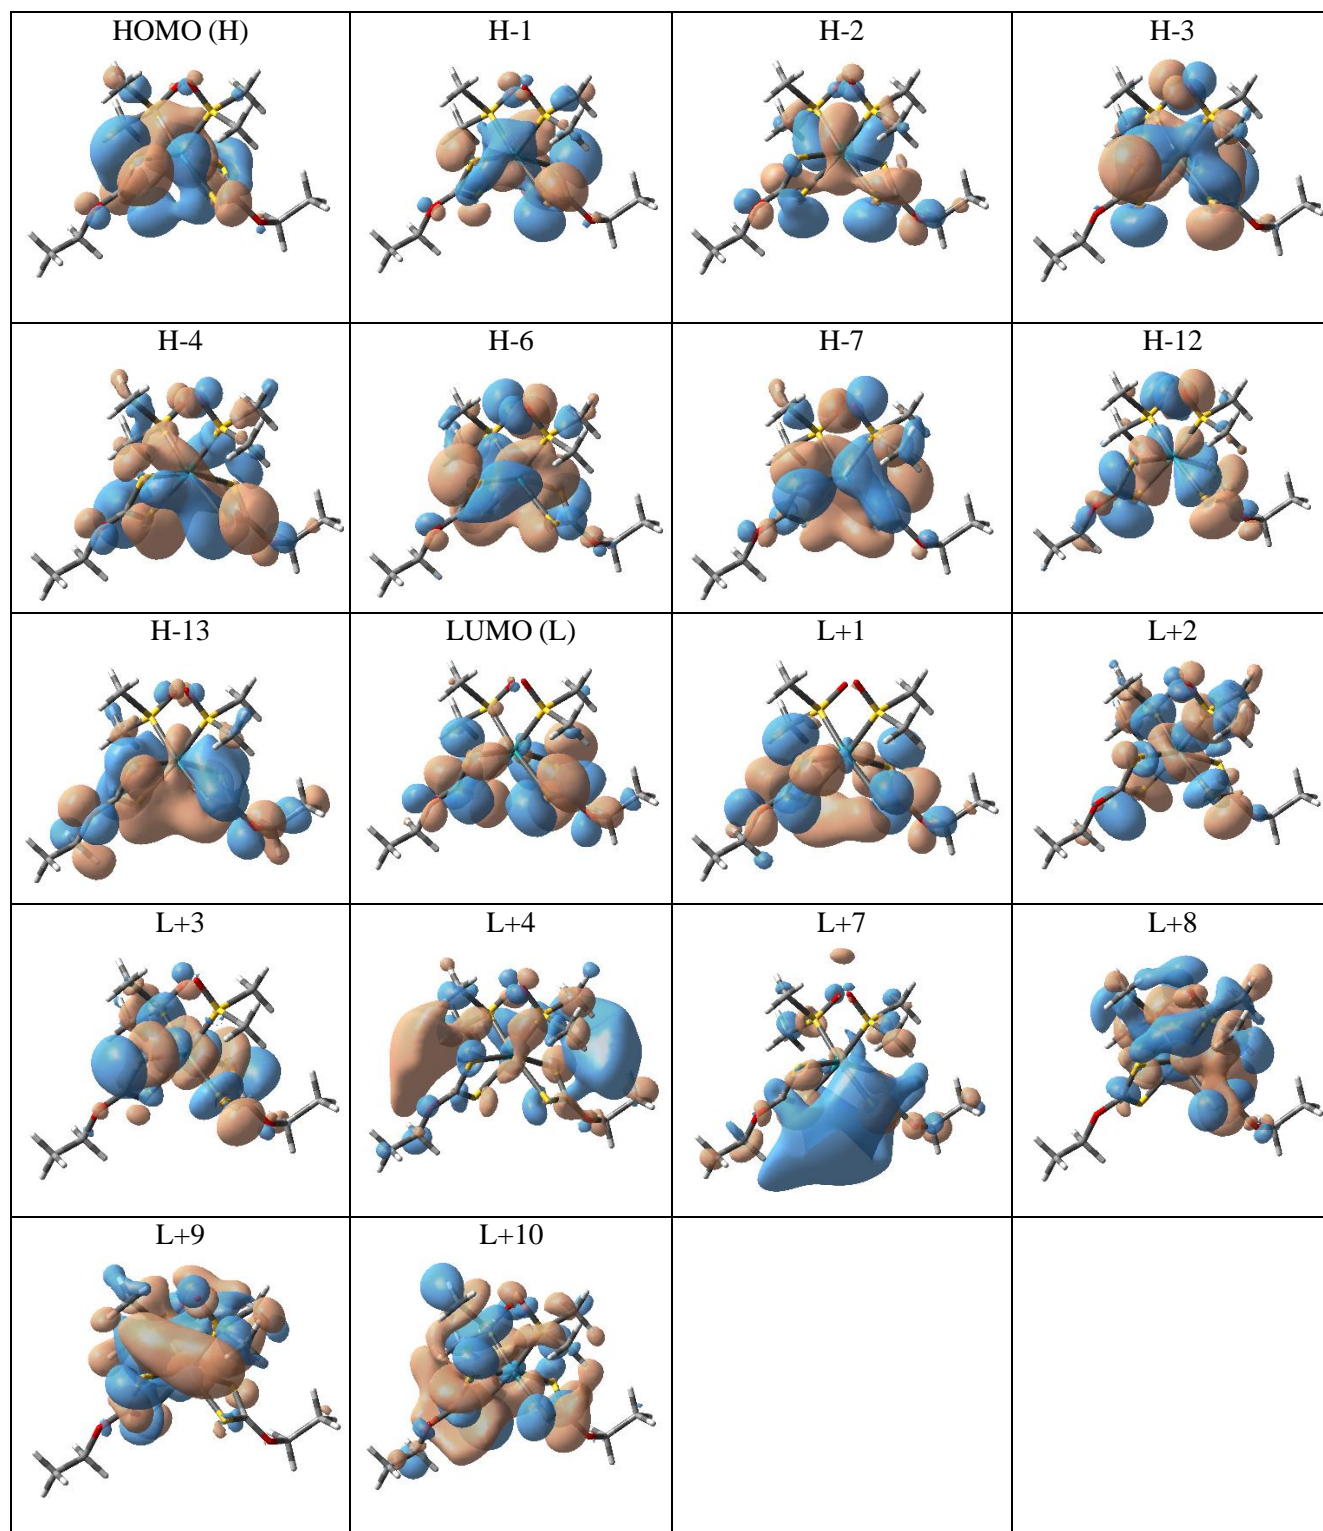

**Fig. 11** Contour plots of the molecular orbitals of  $[\text{Ru}(\text{L}^2)_2(\text{dmsO})_2]$ , which are associated with the electronic spectral transitions (See **Table S8**).

**Table S10** Computed parameters from TDDFT calculations on  $[\text{Ru}(\text{L}^3)_2(\text{dmsO})_2]$  for electronic spectral properties in dichloromethane solution

| Excited State | Composition            | CI value | $E$ (eV) | Oscillator strength ( $f$ ) | $\lambda_{\text{theo}}$ (nm) | Assignment | $\lambda_{\text{exp}}$ (nm) |
|---------------|------------------------|----------|----------|-----------------------------|------------------------------|------------|-----------------------------|
| 10            | H-2 $\rightarrow$ L    | 0.10111  | 3.7320   | 0.0198                      | 332.22                       | MLCT/LLCT  | 345                         |
|               | H-1 $\rightarrow$ L+1  | 0.64772  |          |                             |                              | MLCT/LLCT  |                             |
|               | H-1 $\rightarrow$ L+3  | 0.15926  |          |                             |                              | MLCT/LLCT  |                             |
|               | H $\rightarrow$ L      | 0.16827  |          |                             |                              | MLCT/LLCT  |                             |
| 25            | H-7 $\rightarrow$ L+3  | 0.10910  | 5.0142   | 0.1837                      | 247.27                       | LMCT       | 286                         |
|               | H-6 $\rightarrow$ L+2  | 0.53426  |          |                             |                              | LMCT       |                             |
|               | H-5 $\rightarrow$ L+2  | 0.35139  |          |                             |                              | LMCT       |                             |
|               | H-3 $\rightarrow$ L+3  | 0.14814  |          |                             |                              | LMCT       |                             |
|               | H $\rightarrow$ L+2    | 0.12279  |          |                             |                              | LLCT       |                             |
| 73            | H-13 $\rightarrow$ L+3 | 0.16218  | 6.3218   | 0.1614                      | 196.12                       | LMCT/LLCT  | 238                         |
|               | H-12 $\rightarrow$ L+2 | 0.14175  |          |                             |                              | LMCT/LLCT  |                             |
|               | H-5 $\rightarrow$ L+5  | 0.13576  |          |                             |                              | LMCT       |                             |
|               | H-3 $\rightarrow$ L+4  | 0.25160  |          |                             |                              | LMCT       |                             |
|               | H-2 $\rightarrow$ L+7  | 0.10755  |          |                             |                              | LMCT/LLCT  |                             |
|               | H-2 $\rightarrow$ L+8  | 0.38866  |          |                             |                              | MLCT/LLCT  |                             |
|               | H-1 $\rightarrow$ L+9  | 0.27524  |          |                             |                              | LLCT/MLCT  |                             |
|               | H-1 $\rightarrow$ L+10 | 0.16223  |          |                             |                              | MLCT       |                             |
|               | H-1 $\rightarrow$ L+12 | 0.15338  |          |                             |                              | MLCT/LLCT  |                             |

**Table S11** Compositions of selected molecular orbitals of  $[\text{Ru}(\text{L}^3)_2(\text{dmsO})_2]$  associated with the electronic spectral transitions

| % Contribution of fragments to | Fragments |                    |                    |          |          |
|--------------------------------|-----------|--------------------|--------------------|----------|----------|
|                                | Ru        | L <sup>3</sup> (1) | L <sup>3</sup> (2) | DMSO (1) | DMSO (2) |
| HOMO (H)                       | 50        | 23                 | 23                 | 2        | 2        |
| H-1                            | 50        | 23                 | 23                 | 2        | 2        |
| H-2                            | 65        | 15                 | 14                 | 3        | 3        |
| H-3                            | 7         | 37                 | 37                 | 10       | 9        |
| H-5                            | 7         | 17                 | 17                 | 30       | 29       |
| H-6                            | 19        | 19                 | 18                 | 22       | 22       |
| H-7                            | 40        | 24                 | 24                 | 6        | 6        |
| H-12                           | 26        | 28                 | 28                 | 9        | 9        |
| H-13                           | 22        | 37                 | 37                 | 2        | 2        |
| LUMO (L)                       | 9         | 45                 | 45                 | 0        | 1        |
| L+1                            | 4         | 48                 | 48                 | 0        | 0        |
| L+2                            | 50        | 14                 | 14                 | 11       | 11       |
| L+3                            | 52        | 21                 | 21                 | 3        | 3        |
| L+4                            | 85        | 4                  | 5                  | 3        | 3        |
| L+5                            | 73        | 0                  | 0                  | 13       | 14       |
| L+7                            | 82        | 7                  | 7                  | 2        | 2        |
| L+8                            | 12        | 12                 | 10                 | 33       | 33       |
| L+9                            | 30        | 6                  | 6                  | 29       | 29       |
| L+10                           | 8         | 32                 | 32                 | 14       | 14       |
| L+12                           | 14        | 15                 | 15                 | 28       | 28       |

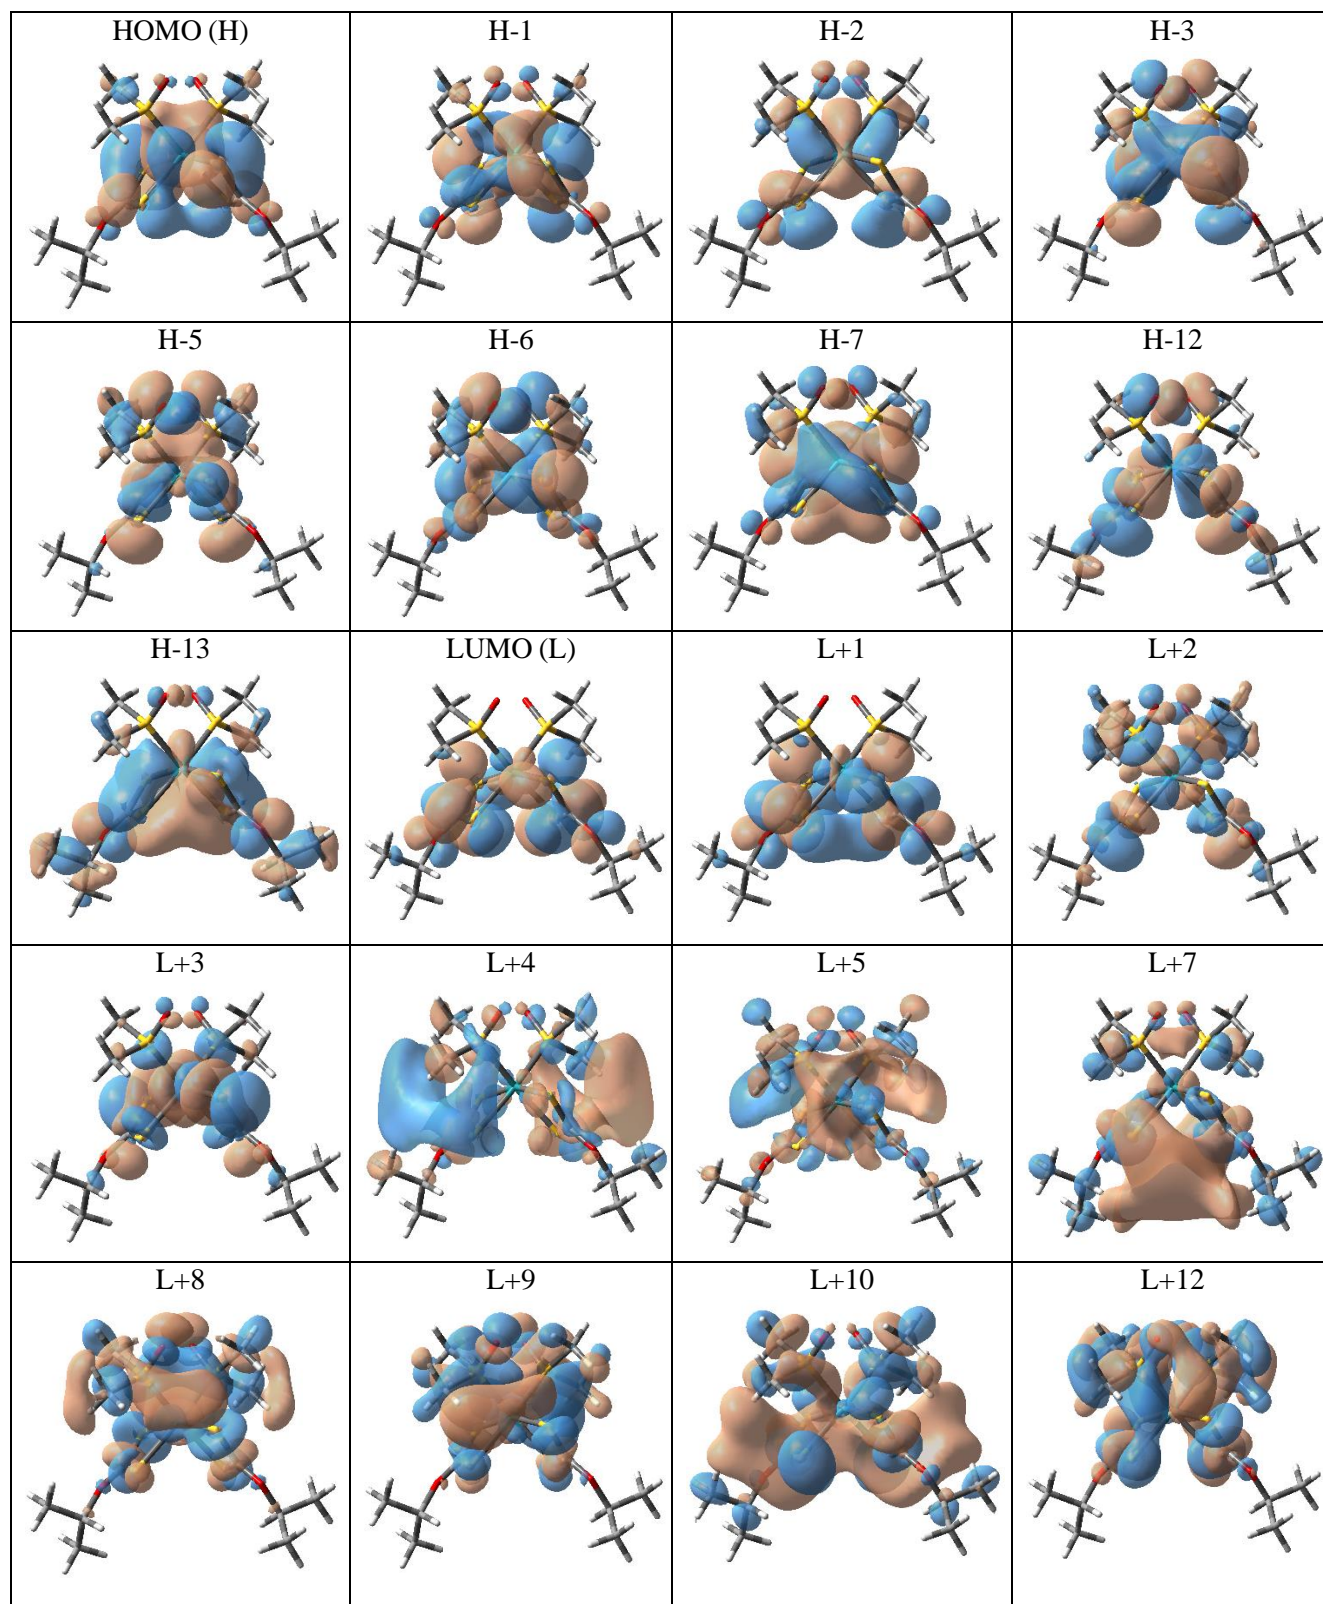

**Fig. S12** Contour plots of the molecular orbitals of  $[\text{Ru}(\text{L}^3)_2(\text{dmsO})_2]$ , which are associated with the electronic spectral transitions (See **Table S10**).

**Table S12** Computed parameters from TDDFT calculations on [Ru(L<sup>4</sup>)<sub>2</sub>(dmsO)<sub>2</sub>] for electronic spectral properties in dichloromethane solution

| Excited State | Composition | CI value | <i>E</i> (eV) | Oscillator strength ( <i>f</i> ) | $\lambda_{\text{theo}}$ (nm) | Assignment | $\lambda_{\text{exp}}$ (nm) |
|---------------|-------------|----------|---------------|----------------------------------|------------------------------|------------|-----------------------------|
| 10            | H-2 → L     | 0.10618  | 3.6858        | 0.0193                           | 336.38                       | MLCT/LLCT  | 345                         |
|               | H-1 → L+1   | 0.65694  |               |                                  |                              | MLCT/LLCT  |                             |
|               | H-1 → L+3   | 0.11120  |               |                                  |                              | MLCT/LLCT  |                             |
|               | H → L       | 0.17414  |               |                                  |                              | MLCT/LLCT  |                             |
| 25            | H-7 → L+3   | 0.13542  | 5.0234        | 0.1669                           | 246.81                       | LMCT       | 283                         |
|               | H-6 → L     | 0.16854  |               |                                  |                              | LLCT/MLCT  |                             |
|               | H-6 → L+2   | 0.52297  |               |                                  |                              | LMCT       |                             |
|               | H-5 → L+2   | 0.31405  |               |                                  |                              | LMCT       |                             |
|               | H-3 → L+3   | 0.16320  |               |                                  |                              | LMCT       |                             |
|               | H → L+2     | 0.12923  |               |                                  |                              | LLCT/LMCT  |                             |
| 74            | H-16 → L+1  | 0.10296  | 6.2953        | 0.0945                           | 196.95                       | MLCT       | 240                         |
|               | H-15 → L    | 0.15666  |               |                                  |                              | LMCT/LLCT  |                             |
|               | H-14 → L+1  | 0.13018  |               |                                  |                              | MLCT/LLCT  |                             |
|               | H-12 → L+2  | 0.19600  |               |                                  |                              | LMCT/LLCT  |                             |
|               | H-4 → L+4   | 0.25886  |               |                                  |                              | LMCT       |                             |
|               | H-3 → L+4   | 0.20642  |               |                                  |                              | LMCT       |                             |
|               | H-2 → L+7   | 0.11601  |               |                                  |                              | LMCT       |                             |
|               | H-1 → L+9   | 0.28232  |               |                                  |                              | LLCT/MLCT  |                             |
|               | H-1 → L+10  | 0.30329  |               |                                  |                              | MLCT       |                             |
|               | H-1 → L+12  | 0.13713  |               |                                  |                              | MLCT/LLCT  |                             |
|               | H → L+11    | 0.18178  |               |                                  |                              | MLCT       |                             |

**Table S13** Compositions of selected molecular orbitals of  $[\text{Ru}(\text{L}^4)_2(\text{dmsO})_2]$  associated with the electronic spectral transitions

| % Contribution of fragments to | Fragments |                    |                    |          |          |
|--------------------------------|-----------|--------------------|--------------------|----------|----------|
|                                | Ru        | L <sup>4</sup> (1) | L <sup>4</sup> (2) | DMSO (1) | DMSO (2) |
| HOMO (H)                       | 49        | 24                 | 23                 | 2        | 2        |
| H-1                            | 50        | 23                 | 23                 | 2        | 2        |
| H-2                            | 64        | 15                 | 15                 | 3        | 3        |
| H-3                            | 7         | 37                 | 37                 | 9        | 10       |
| H-4                            | 17        | 38                 | 38                 | 4        | 3        |
| H-5                            | 8         | 17                 | 17                 | 29       | 29       |
| H-6                            | 19        | 18                 | 18                 | 22       | 23       |
| H-7                            | 41        | 24                 | 25                 | 5        | 5        |
| H-12                           | 29        | 25                 | 25                 | 11       | 10       |
| H-14                           | 16        | 40                 | 40                 | 2        | 2        |
| H-15                           | 4         | 48                 | 48                 | 0        | 0        |
| H-16                           | 12        | 44                 | 44                 | 0        | 0        |
| LUMO (L)                       | 6         | 47                 | 46                 | 1        | 0        |
| L+1                            | 4         | 48                 | 48                 | 0        | 0        |
| L+2                            | 53        | 12                 | 13                 | 11       | 11       |
| L+3                            | 52        | 21                 | 21                 | 3        | 3        |
| L+4                            | 89        | 3                  | 4                  | 2        | 2        |
| L+7                            | 78        | 10                 | 10                 | 1        | 1        |
| L+9                            | 27        | 9                  | 10                 | 27       | 27       |
| L+10                           | 10        | 29                 | 28                 | 16       | 17       |
| L+11                           | 14        | 23                 | 24                 | 20       | 19       |
| L+12                           | 10        | 15                 | 15                 | 30       | 30       |



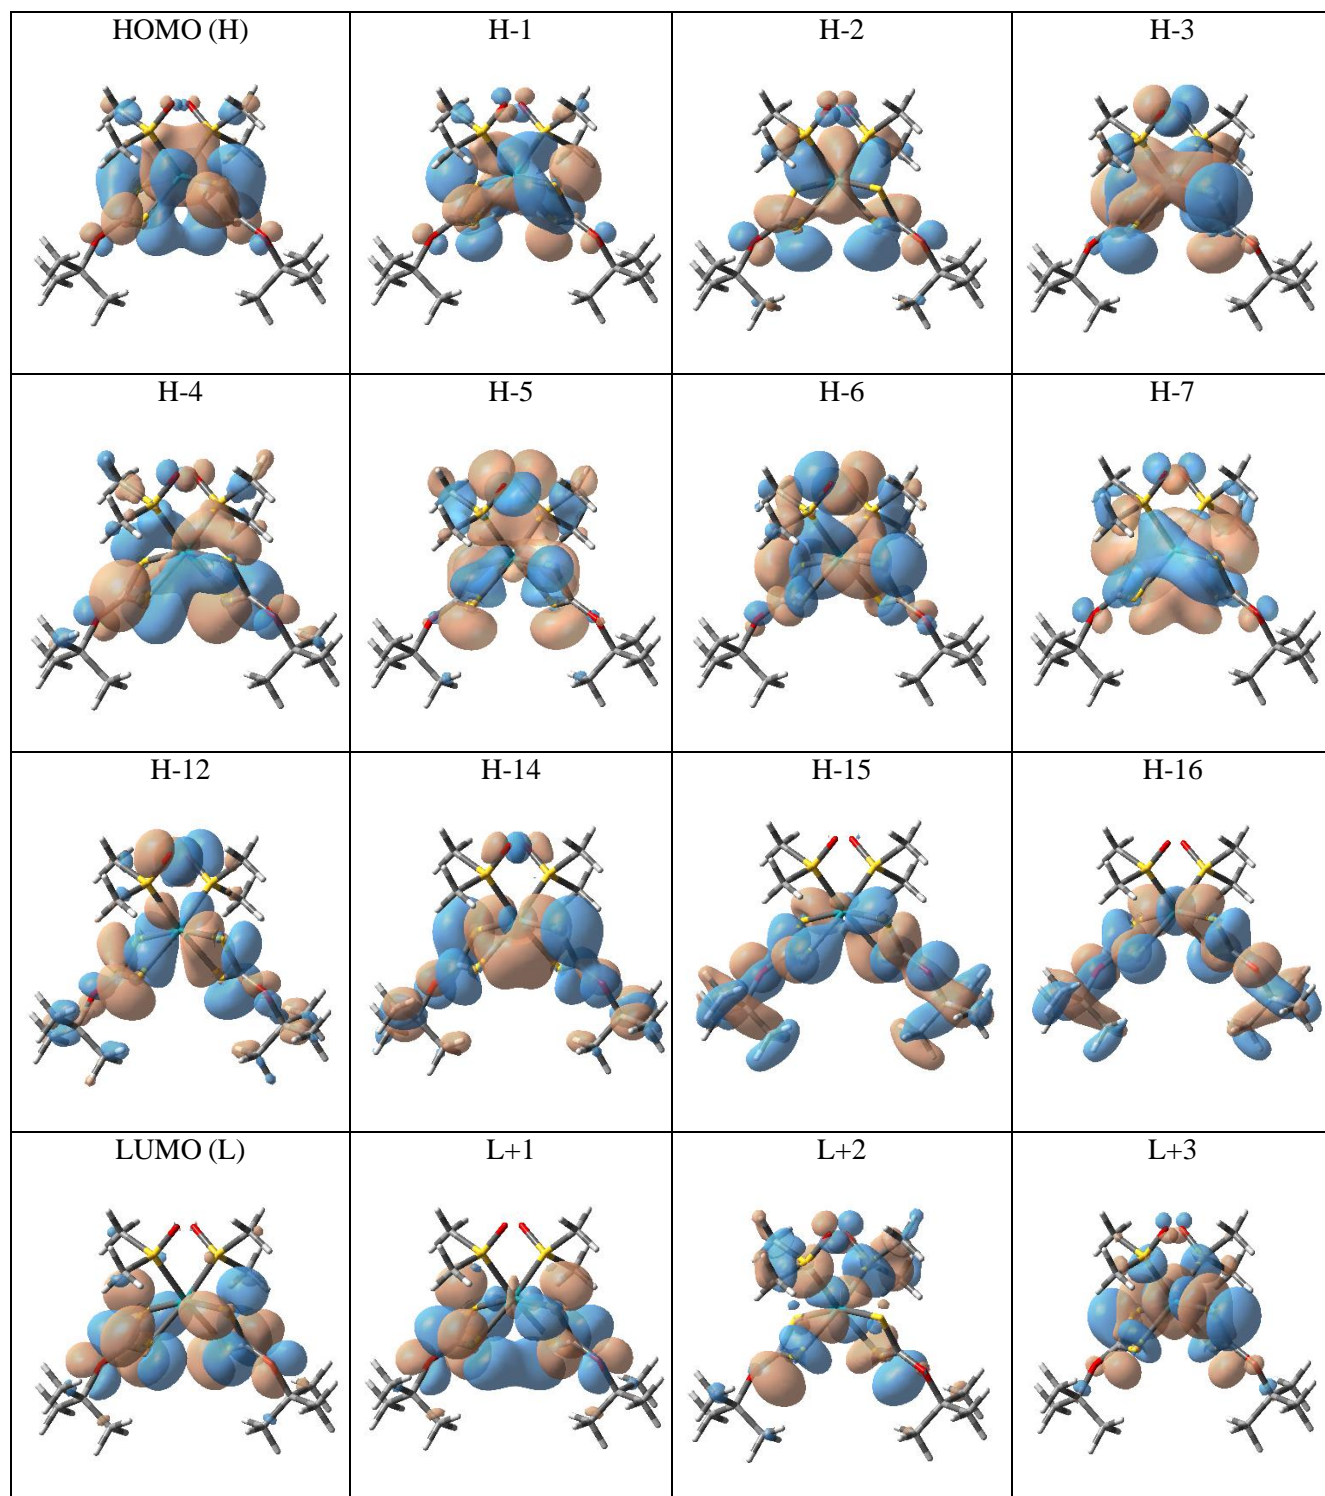



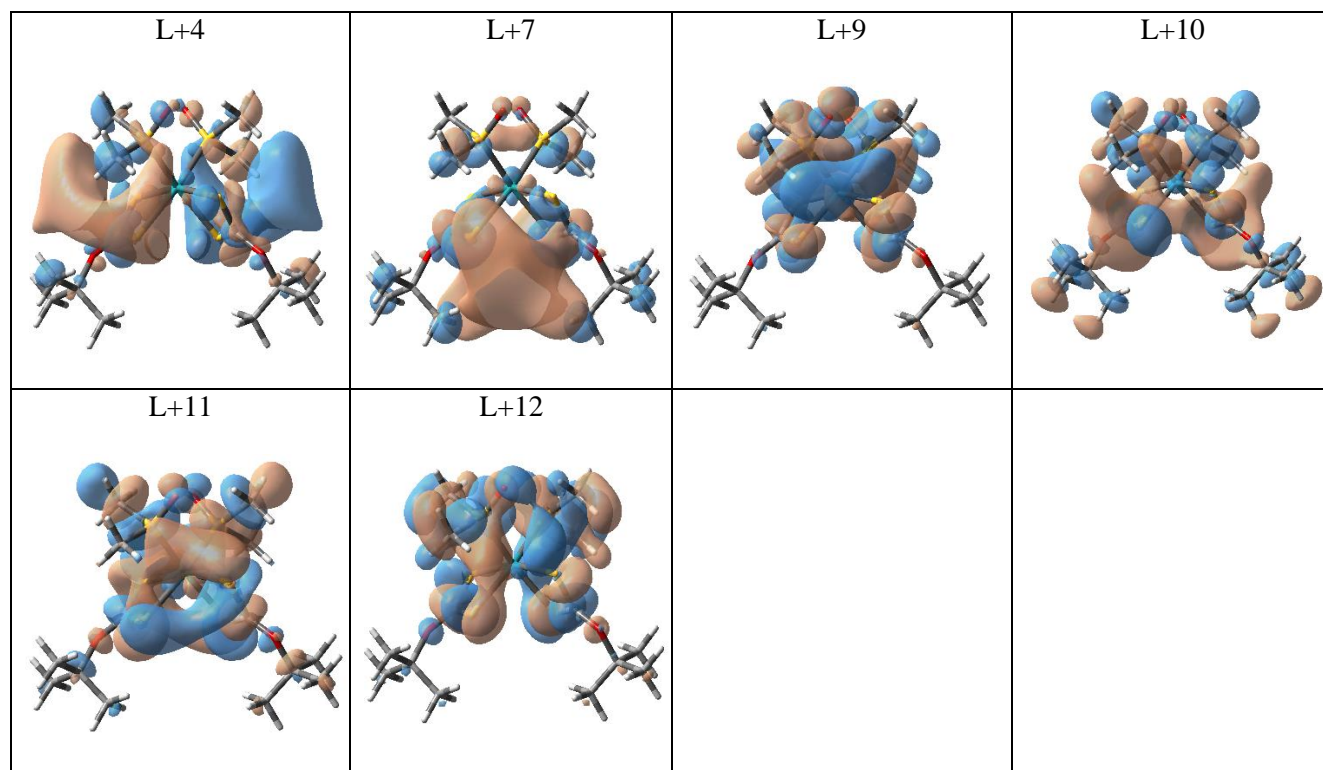

**Fig. S13** Contour plots of the molecular orbitals of  $[\text{Ru}(\text{L}^4)_2(\text{dmsO})_2]$ , which are associated with the electronic spectral transitions (See **Table S12**).

**Table S14** Computed parameters from TDDFT calculations on [Ru(L<sup>3</sup>)<sub>2</sub>(bpy)] for electronic spectral properties in dichloromethane solution

| Excited State | Composition           | CI value | <i>E</i> (eV) | Oscillator strength ( <i>f</i> ) | $\lambda_{\text{theo}}$ (nm) | Assignment | $\lambda_{\text{exp}}$ (nm) |
|---------------|-----------------------|----------|---------------|----------------------------------|------------------------------|------------|-----------------------------|
| 3             | H-2 $\rightarrow$ L   | 0.38146  | 2.5033        | 0.1017                           | 495.29                       | MLCT/LLCT  | 560                         |
|               | H-1 $\rightarrow$ L   | 0.56561  |               |                                  |                              | MLCT/LLCT  |                             |
|               | H $\rightarrow$ L+5   | 0.12297  |               |                                  |                              | MLCT       |                             |
| 14            | H-2 $\rightarrow$ L+1 | 0.46287  | 3.2995        | 0.0384                           | 375.77                       | MLCT/LLCT  | 409                         |
|               | H-2 $\rightarrow$ L+2 | 0.20042  |               |                                  |                              | MLCT/LLCT  |                             |
|               | H-1 $\rightarrow$ L+1 | 0.21778  |               |                                  |                              | MLCT/LLCT  |                             |
|               | H-1 $\rightarrow$ L+2 | 0.33870  |               |                                  |                              | MLCT/LLCT  |                             |
|               | H-1 $\rightarrow$ L+6 | 0.10499  |               |                                  |                              | LLCT/MLCT  |                             |
|               | H $\rightarrow$ L+4   | 0.19244  |               |                                  |                              | MLCT/LLCT  |                             |
| 22            | H-3 $\rightarrow$ L   | 0.40488  | 3.6229        | 0.1456                           | 342.22                       | LLCT/MLCT  | 378                         |
|               | H-2 $\rightarrow$ L+1 | 0.14001  |               |                                  |                              | MLCT/LLCT  |                             |
|               | H-2 $\rightarrow$ L+4 | 0.41210  |               |                                  |                              | MLCT/LLCT  |                             |
|               | H-1 $\rightarrow$ L+1 | 0.20206  |               |                                  |                              | MLCT/LLCT  |                             |
|               | H-1 $\rightarrow$ L+3 | 0.10930  |               |                                  |                              | MLCT/LLCT  |                             |
|               | H-1 $\rightarrow$ L+4 | 0.14342  |               |                                  |                              | MLCT/LLCT  |                             |
|               | H-1 $\rightarrow$ L+6 | 0.10009  |               |                                  |                              | LLCT/MLCT  |                             |
|               | H $\rightarrow$ L+4   | 0.16497  |               |                                  |                              | MLCT/LLCT  |                             |
| 28            | H-6 $\rightarrow$ L   | 0.55046  | 4.4206        | 0.2723                           | 280.47                       | LLCT/MLCT  | 299                         |
|               | H-4 $\rightarrow$ L+2 | 0.20889  |               |                                  |                              | LLCT/MLCT  |                             |
|               | H-3 $\rightarrow$ L+2 | 0.25077  |               |                                  |                              | LLCT/MLCT  |                             |
|               | H-3 $\rightarrow$ L+4 | 0.15431  |               |                                  |                              | LLCT/MLCT  |                             |
| 48            | H-5 $\rightarrow$ L+1 | 0.12309  | 5.0939        | 0.1981                           | 243.40                       | LLCT/MLCT  | 290                         |
|               | H-5 $\rightarrow$ L+3 | 0.14403  |               |                                  |                              | LLCT/MLCT  |                             |
|               | H-5 $\rightarrow$ L+4 | 0.13169  |               |                                  |                              | LLCT/MLCT  |                             |
|               | H-5 $\rightarrow$ L+5 | 0.38799  |               |                                  |                              | LMCT       |                             |
|               | H-4 $\rightarrow$ L+5 | 0.39837  |               |                                  |                              | LMCT       |                             |
|               | H-3 $\rightarrow$ L+5 | 0.15756  |               |                                  |                              | LMCT       |                             |
|               | H-3 $\rightarrow$ L+6 | 0.11123  |               |                                  |                              | LMCT/LLCT  |                             |
|               | H $\rightarrow$ L+8   | 0.16743  |               |                                  |                              | LMCT       |                             |

**Table S15** Compositions of selected molecular orbitals of  $[\text{Ru}(\text{L}^3)_2(\text{bpy})]$  associated with the electronic spectral transitions

| % Contribution of fragments to | Fragments |                  |                  |     |
|--------------------------------|-----------|------------------|------------------|-----|
|                                | Ru        | $\text{L}^3$ (1) | $\text{L}^3$ (2) | bpy |
| HOMO (H)                       | 66        | 14               | 17               | 3   |
| H-1                            | 59        | 15               | 15               | 11  |
| H-2                            | 72        | 12               | 9                | 7   |
| H-3                            | 8         | 44               | 43               | 5   |
| H-4                            | 11        | 45               | 40               | 4   |
| H-5                            | 24        | 32               | 39               | 5   |
| H-6                            | 19        | 38               | 38               | 5   |
| LUMO (L)                       | 6         | 1                | 1                | 92  |
| L+1                            | 4         | 1                | 0                | 95  |
| L+2                            | 2         | 0                | 0                | 98  |
| L+3                            | 6         | 92               | 1                | 1   |
| L+4                            | 6         | 1                | 92               | 1   |
| L+5                            | 54        | 20               | 22               | 4   |
| L+6                            | 57        | 14               | 13               | 16  |
| L+8                            | 91        | 4                | 3                | 2   |

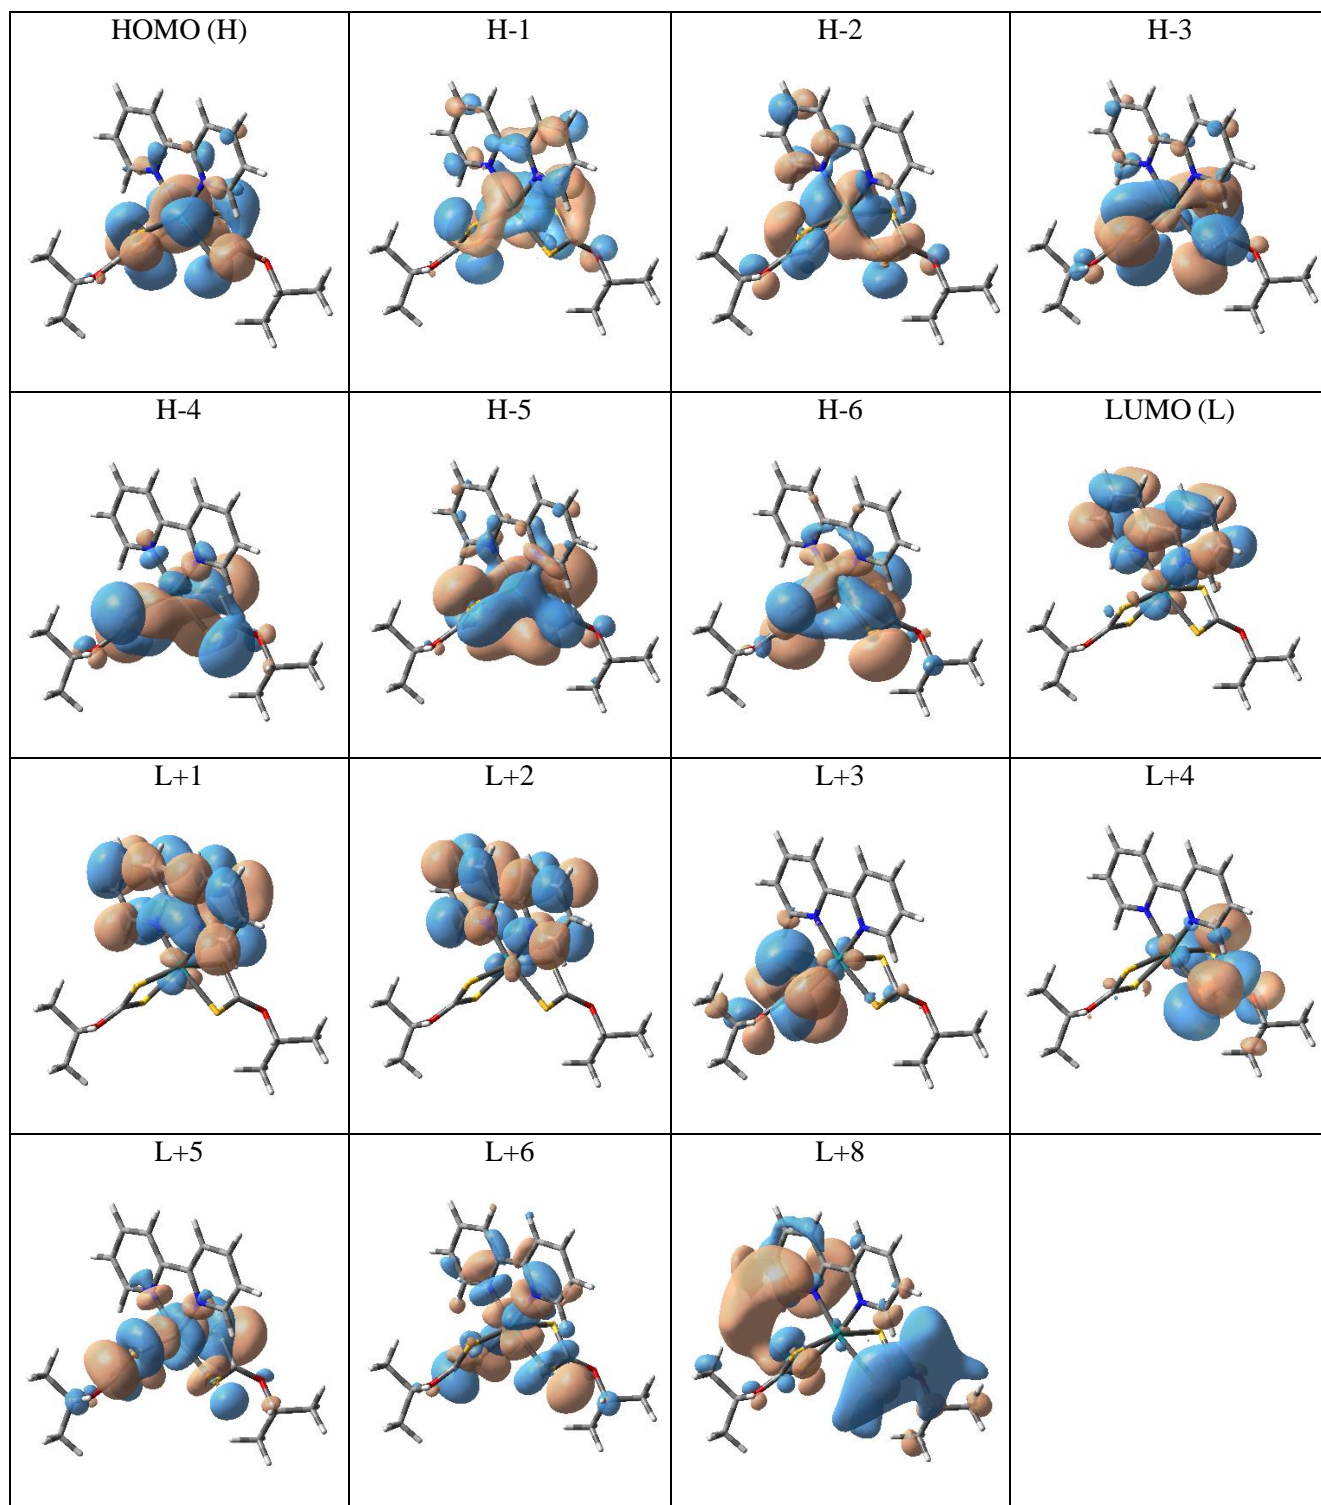

**Fig. S14** Contour plots of the molecular orbitals of  $[\text{Ru}(\text{L}^3)_2(\text{bpy})]$ , which are associated with the electronic spectral transitions (See **Table S14**).

**Table S16** Computed parameters from TDDFT calculations on [Ru(L<sup>2</sup>)<sub>2</sub>(phen)] for electronic spectral properties in dichloromethane solution

| Excited State | Composition           | CI value | <i>E</i> (eV) | Oscillator strength ( <i>f</i> ) | $\lambda_{\text{theo}}$ (nm) | Assignment | $\lambda_{\text{exp}}$ (nm) |
|---------------|-----------------------|----------|---------------|----------------------------------|------------------------------|------------|-----------------------------|
| 4             | H-2 $\rightarrow$ L   | 0.15308  | 2.5195        | 0.0443                           | 492.11                       | MLCT/LLCT  | 540                         |
|               | H-2 $\rightarrow$ L+1 | 0.40989  |               |                                  |                              | MLCT/LLCT  |                             |
|               | H-1 $\rightarrow$ L   | 0.45837  |               |                                  |                              | MLCT/LLCT  |                             |
|               | H-1 $\rightarrow$ L+1 | 0.14257  |               |                                  |                              | MLCT/LLCT  |                             |
|               | H $\rightarrow$ L+1   | 0.22241  |               |                                  |                              | MLCT/LLCT  |                             |
|               | H $\rightarrow$ L+5   | 0.14750  |               |                                  |                              | MLCT       |                             |
| 7             | H-2 $\rightarrow$ L   | 0.10867  | 2.7212        | 0.1338                           | 455.63                       | MLCT/LLCT  | 496                         |
|               | H-2 $\rightarrow$ L+1 | 0.53525  |               |                                  |                              | MLCT/LLCT  |                             |
|               | H-1 $\rightarrow$ L   | 0.39303  |               |                                  |                              | MLCT/LLCT  |                             |
|               | H $\rightarrow$ L+1   | 0.14678  |               |                                  |                              | MLCT/LLCT  |                             |
| 15            | H-2 $\rightarrow$ L+2 | 0.19555  | 3.3169        | 0.0419                           | 373.80                       | MLCT       | 351                         |
|               | H-2 $\rightarrow$ L+3 | 0.52184  |               |                                  |                              | MLCT       |                             |
|               | H-1 $\rightarrow$ L+3 | 0.40663  |               |                                  |                              | MLCT       |                             |
| 24            | H-6 $\rightarrow$ L   | 0.12879  | 3.9000        | 0.0440                           | 317.91                       | LLCT/MLCT  | 324                         |
|               | H-2 $\rightarrow$ L+4 | 0.38011  |               |                                  |                              | MLCT/LLCT  |                             |
|               | H-1 $\rightarrow$ L+4 | 0.54648  |               |                                  |                              | MLCT/LLCT  |                             |
| 42            | H-9 $\rightarrow$ L   | 0.32779  | 4.8097        | 0.4374                           | 257.78                       | MLCT       | 269                         |
|               | H-8 $\rightarrow$ L   | 0.45029  |               |                                  |                              | LLCT/MLCT  |                             |
|               | H-8 $\rightarrow$ L+4 | 0.10327  |               |                                  |                              | LLCT/MLCT  |                             |
|               | H-6 $\rightarrow$ L+1 | 0.28400  |               |                                  |                              | LLCT/MLCT  |                             |
|               | H-5 $\rightarrow$ L+3 | 0.10516  |               |                                  |                              | MLCT/LLCT  |                             |
|               | H-4 $\rightarrow$ L+5 | 0.10628  |               |                                  |                              | LMCT       |                             |
|               | H-1 $\rightarrow$ L+7 | 0.12297  |               |                                  |                              | LLCT/LMCT  |                             |

**Table S17** Compositions of selected molecular orbitals of [Ru(L<sup>2</sup>)<sub>2</sub>(phen)] associated with the electronic spectral transitions

| % Contribution of fragments to | Fragments |                    |                    |      |
|--------------------------------|-----------|--------------------|--------------------|------|
|                                | Ru        | L <sup>2</sup> (1) | L <sup>2</sup> (2) | phen |
| HOMO (H)                       | 66        | 14                 | 17                 | 3    |
| H-1                            | 57        | 16                 | 15                 | 12   |
| H-2                            | 74        | 12                 | 8                  | 6    |
| H-4                            | 12        | 45                 | 39                 | 4    |
| H-5                            | 24        | 33                 | 38                 | 5    |
| H-6                            | 19        | 38                 | 37                 | 6    |
| H-8                            | 23        | 31                 | 33                 | 13   |
| H-9                            | 1         | 1                  | 1                  | 97   |
| LUMO (L)                       | 7         | 1                  | 1                  | 91   |
| L+1                            | 1         | 0                  | 0                  | 99   |
| L+2                            | 6         | 35                 | 11                 | 48   |
| L+3                            | 5         | 51                 | 31                 | 13   |
| L+4                            | 4         | 7                  | 52                 | 37   |
| L+5                            | 54        | 20                 | 22                 | 4    |
| L+7                            | 58        | 14                 | 13                 | 15   |

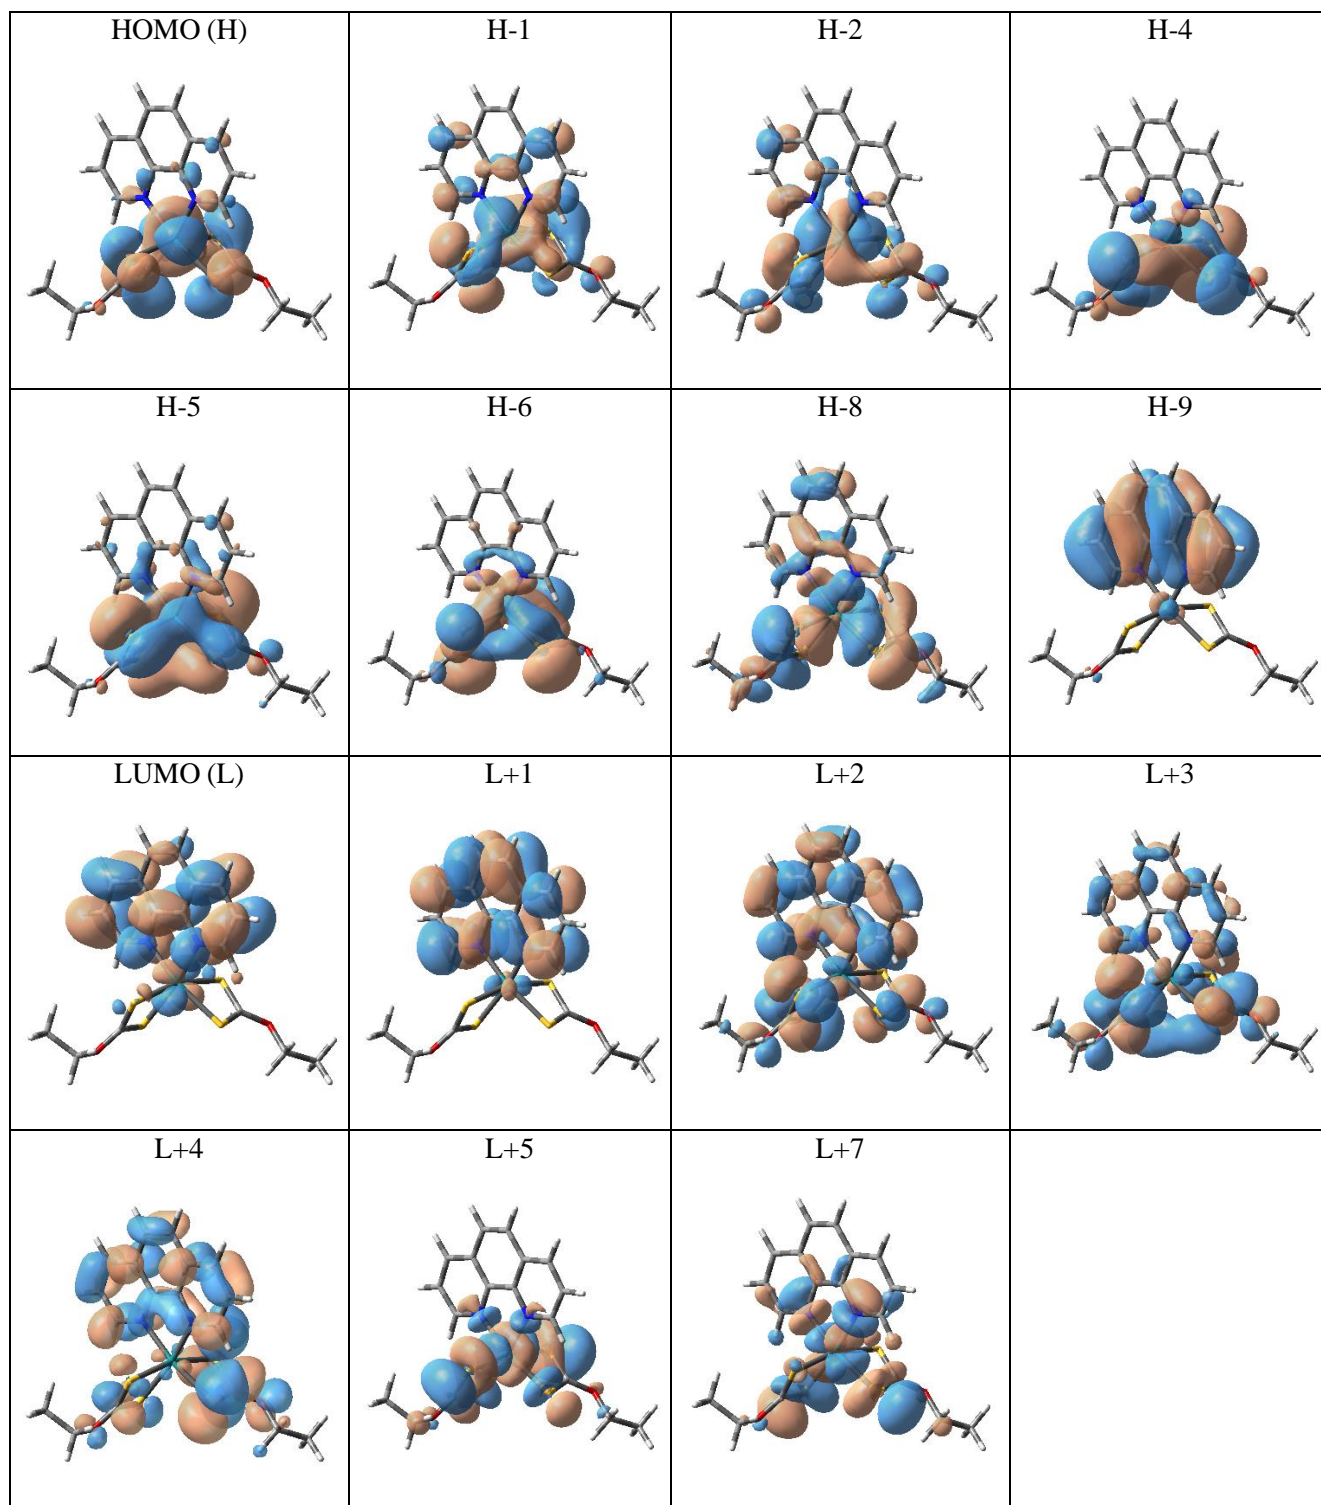

**Fig. S15** Contour plots of the molecular orbitals of  $[\text{Ru}(\text{L}^2)_2(\text{phen})]$ , which are associated with the electronic spectral transitions (See **Table S16**).

**Table S18** Optimization of the reaction conditions for the catalysis<sup>a</sup>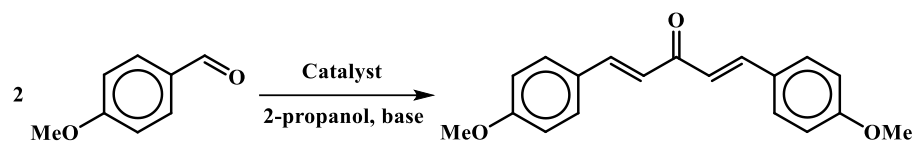

| Entry           | Mole % of catalyst | Solvent    | Base                           | Mole % of base | Temp, °C | Time, h | Yield, % |
|-----------------|--------------------|------------|--------------------------------|----------------|----------|---------|----------|
| 1               | 1                  | 2-propanol | KOH                            | 1              | 83       | 6       | 43       |
| 2               | 1                  | 2-propanol | KOH                            | 1              | 83       | 3       | 40       |
| 3               | 1                  | 2-propanol | KOH                            | 0.5            | 83       | 6       | 52       |
| 4               | 1                  | 2-propanol | KO <sup>t</sup> Bu             | 1              | 83       | 6       | 81       |
| 5               | 1                  | 2-propanol | KO <sup>t</sup> Bu             | 0.5            | 83       | 6       | 79       |
| 6               | 0.5                | 2-propanol | KO <sup>t</sup> Bu             | 0.5            | 83       | 6       | 75       |
| 7               | 0.5                | 2-propanol | KO <sup>t</sup> Bu             | 0.5            | 83       | 8       | 60       |
| 8               | 0.5                | 2-propanol | K <sub>3</sub> PO <sub>4</sub> | 0.5            | 83       | 6       | 9        |
| 9               | 0.25               | 2-propanol | KO <sup>t</sup> Bu             | 0.5            | 83       | 6       | 36       |
| 10              | -                  | 2-propanol | KO <sup>t</sup> Bu             | 0.5            | 83       | 6       | NO       |
| 11              | 0.5                | 2-propanol | -                              | -              | 83       | 6       | NO       |
| 12              | 0.5                | 2-propanol | KO <sup>t</sup> Bu             | 0.25           | 83       | 6       | 29       |
| 13              | 1                  | 1-propanol | KOH                            | 1              | 97       | 6       | NO       |
| 14              | 1                  | 1-propanol | KO <sup>t</sup> Bu             | 1              | 97       | 6       | NO       |
| 15              | 0.5                | ethanol    | KO <sup>t</sup> Bu             | 0.5            | 78       | 6       | NO       |
| 16 <sup>b</sup> | 0.5                | 2-propanol | KO <sup>t</sup> Bu             | 0.5            | 83       | 6       | 73       |
| 17 <sup>c</sup> | 0.5                | 2-propanol | KO <sup>t</sup> Bu             | 0.5            | 83       | 6       | 75       |
| 18 <sup>d</sup> | 0.5                | 2-propanol | KO <sup>t</sup> Bu             | 0.5            | 83       | 6       | 70       |

<sup>a</sup> Reaction conditions: Catalyst, [Ru(L<sup>3</sup>)<sub>2</sub>(dmsO)<sub>2</sub>]; substrate, 4-methoxybenzaldehyde (1 mmol); solvent (5.0 mL).

<sup>b</sup> Catalyst, [Ru(L<sup>1</sup>)<sub>2</sub>(dmsO)<sub>2</sub>]

<sup>c</sup> Catalyst, [Ru(L<sup>2</sup>)<sub>2</sub>(dmsO)<sub>2</sub>]

<sup>d</sup> Catalyst, [Ru(L<sup>4</sup>)<sub>2</sub>(dmsO)<sub>2</sub>]



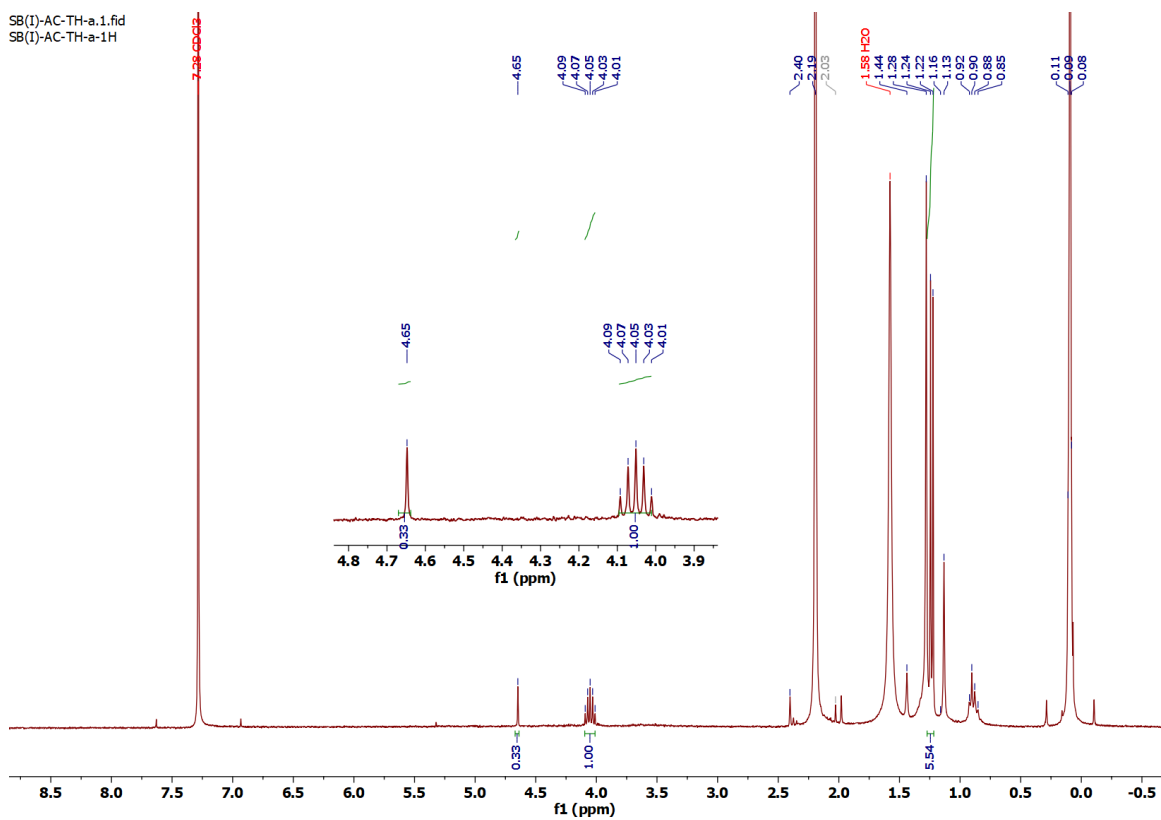

**Fig. S16**  $^1\text{H}$  NMR spectrum of  $\text{H}_2$  generated from cycle-I, trapped in  $\text{CDCl}_3$ .

**Table S19** Comparison of different catalysts for the acceptorless alcohol dehydrogenation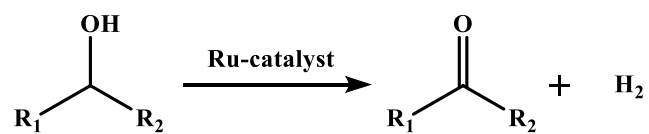

| Entry | Alcohol                                                                             | Ketone                                                                              | TON  | TOF (h <sup>-1</sup> ) | Reference        |
|-------|-------------------------------------------------------------------------------------|-------------------------------------------------------------------------------------|------|------------------------|------------------|
| 1     | 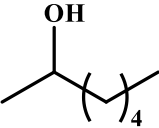   |    | 190  | 7.92                   | <b>25a</b>       |
| 2     |    |    | 8    | 0.17                   | <b>25b</b>       |
| 3     |    |    | 1080 | 24                     | <b>25c</b>       |
| 4     |   |   | 192  | 8                      | <b>25d</b>       |
| 5     |  |  | 38   | 1.58                   | <b>25e</b>       |
| 6     |  |  | 194  | 9.70                   | <b>25f</b>       |
| 7     |  |  | 22.4 | 0.47                   | <b>25g</b>       |
| 8     |  |  | 36   | 0.80                   | <b>25h</b>       |
| 9     |  |  | 287  | 4.10                   | <b>25i</b>       |
| 10    |  |  | 201  | 33.34                  | <b>This work</b> |

**Chart S1** NMR spectral characterization data for the organic products.

**1,5-diphenyl-penta-1,4-(*E,E*)-dien-3-one (P<sub>1</sub>).** Yellow solid. Yield: 80%. <sup>1</sup>H NMR (400 MHz, CDCl<sub>3</sub>): δ 7.10 (2H, d, *J* = 15.9) 7.31 – 7.49 (6H, m), 7.62 (4H, dd, *J* = 6.8, 2.9), 7.75 (2H, d, *J* = 16.0). <sup>13</sup>C{<sup>1</sup>H} NMR (101 MHz, CDCl<sub>3</sub>): δ 125.5, 128.5, 129.1, 130.6, 134.9, 143.4, 189.0.

**1,5-Bis-(4-methoxyphenyl)-penta-1,4-(*E,E*)-dien-3-one (P<sub>2</sub>).** Yellow solid. Yield: 75%. <sup>1</sup>H NMR (400 MHz, CDCl<sub>3</sub>): δ 3.87 (6H, s), 6.94 – 7.00 (6H, m), 7.59 (4H, d, *J* = 8.9), 7.73 (2H, d, *J* = 15.9). <sup>13</sup>C{<sup>1</sup>H} NMR (101 MHz, CDCl<sub>3</sub>): δ 55.4, 114.4, 123.4, 127.7, 130.1, 142.9, 161.6, 188.9.

**1,5-Bis-(4-methylphenyl)-penta-1,4-(*E,E*)-dien-3-one (P<sub>3</sub>).** Yellow solid. Yield: 89%. <sup>1</sup>H NMR (400 MHz, CDCl<sub>3</sub>): δ 2.42 (6H, s), 7.07 (2H, d, *J* = 15.9), 7.25 (4H, d, *J* = 8.1), 7.54 (4H, d, *J* = 8.1), 7.75 (2H, d, *J* = 15.9). <sup>13</sup>C{<sup>1</sup>H} NMR (101 MHz, CDCl<sub>3</sub>): δ 21.6, 124.6, 128.5, 129.8, 132.2, 141.0, 143.3, 189.2.

**1,5-Bis-(4-fluorophenyl)-penta-1,4-(*E,E*)-dien-3-one (P<sub>4</sub>).** Yellow solid. Yield: 51%. <sup>1</sup>H NMR (400 MHz, CDCl<sub>3</sub>): δ 7.01 (2H, d, *J* = 15.8), 7.12 (4H, m), 7.62 (4H, dd, *J* = 5.4, 3.5), 7.72 (2H, d, *J* = 15.9). <sup>13</sup>C{<sup>1</sup>H} NMR (101 MHz, CDCl<sub>3</sub>): δ 116.0 (<sup>2</sup>*J*<sub>C-F</sub> = 22.2, 1st ArCH), 116.3 (<sup>2</sup>*J*<sub>C-F</sub> = 22.2, 2nd ArCH), 126.9 (<sup>6</sup>*J*<sub>C-F</sub> = 2.0, Ar-CH=CH-), 126.9 (<sup>6</sup>*J*<sub>C-F</sub> = 2.0, Ar-CH=CH-), 130.3 (<sup>3</sup>*J*<sub>C-F</sub> = 8.1, 1st ArCH), 130.3 (<sup>3</sup>*J*<sub>C-F</sub> = 8.1, 2nd ArCH), 131.0 (<sup>4</sup>*J*<sub>C-F</sub> = 3.0, ArC), 131.0 (<sup>4</sup>*J*<sub>C-F</sub> = 3.0, ArC), 142.1 (Ar-CH=CH-), 162.8 (<sup>1</sup>*J*<sub>C-F</sub> = 251.2 ArC-F), 165.3 (<sup>1</sup>*J*<sub>C-F</sub> = 251.2 ArC-F), 188.5. <sup>19</sup>F NMR (377 MHz, CDCl<sub>3</sub>): δ -109.5.

**1,5-Bis-(4-chlorophenyl)-penta-1,4-(*E,E*)-dien-3-one (P<sub>5</sub>).** Yellow solid. Yield: 72%. <sup>1</sup>H NMR (400 MHz, CDCl<sub>3</sub>): δ 7.05 (2H, d, *J* = 16.0), 7.42 (4H, d, *J* = 8.4), 7.57 (4H, d, *J* = 8.6), 7.71 (2H, d, *J* = 16.0). <sup>13</sup>C{<sup>1</sup>H} NMR (101 MHz, CDCl<sub>3</sub>): δ 125.7, 129.3, 129.5, 133.2, 136.5, 142.1, 188.3.

**1,5-Bis-(4-bromophenyl)-penta-1,4-(*E,E*)-dien-3-one (P<sub>6</sub>).** Yellow solid. Yield: 59%. <sup>1</sup>H NMR (400 MHz, CDCl<sub>3</sub>): δ 7.06 (2H, d, *J* = 16.0), 7.49 (4H, d, *J* = 8.6), 7.57 (4H, d, *J* = 8.6), 7.68 (2H, d, *J* = 15.9). <sup>13</sup>C{<sup>1</sup>H} NMR (101 MHz, CDCl<sub>3</sub>): δ 124.9, 125.8, 129.8, 132.3, 133.6, 142.2, 188.4.

**1,5-Bis-(4-iodophenyl)-penta-1,4-(*E,E*)-dien-3-one (P<sub>7</sub>).** Yellow solid. Yield: 54%. <sup>1</sup>H NMR (400 MHz, CDCl<sub>3</sub>): δ 7.07 (2H, d, *J* = 15.9), 7.35 (4H, dd, *J* = 8.3, 2.0), 7.66 (2H, d, *J* = 15.9), 7.78 (4H, dd, *J* = 7.6, 2.2). <sup>13</sup>C{<sup>1</sup>H} NMR (101 MHz, CDCl<sub>3</sub>): δ 96.8, 125.9, 129.7, 134.2, 138.2, 142.1, 188.3.

**1,5-Bis-(2-methoxyphenyl)-penta-1,4-(*E,E*)-dien-3-one (P<sub>8</sub>).** Yellow solid. Yield: 81%. <sup>1</sup>H NMR (400 MHz, CDCl<sub>3</sub>): δ 3.93 (6H, s), 6.95 (2H, dd, *J* = 8.5, 1.1), 7.01 (2H, td, *J* = 7.5, 1.1), 7.20 (2H, d, *J* = 16.1), 7.39 (2H, m), 7.64 (2H, dd, *J* = 7.7, 1.8), 8.09 (2H, d, *J* = 16.2). <sup>13</sup>C{<sup>1</sup>H} NMR (101 MHz, CDCl<sub>3</sub>): δ 55.6, 111.2, 120.8, 124.0, 126.2, 128.7, 131.6, 138.3, 158.6, 190.1.

**1,5-Bis-(2-fluorophenyl)-penta-1,4-(*E,E*)-dien-3-one (P<sub>9</sub>).** Yellow solid. Yield: 48%. <sup>1</sup>H NMR (400 MHz, CDCl<sub>3</sub>): δ 7.11 – 7.20 (6H, m), 7.29 – 7.34 (2H, m), 7.64 (2H, dt, *J* = 7.6, 1.9), 7.84 (2H, d, *J* = 16.1). <sup>13</sup>C{<sup>1</sup>H} NMR (101 MHz, CDCl<sub>3</sub>): δ 116.1 (<sup>2</sup>*J*<sub>C-F</sub> = 21.9, *1st* ArCH), 116.3 (<sup>2</sup>*J*<sub>C-F</sub> = 21.9, *2nd* ArCH), 122.7 (<sup>2</sup>*J*<sub>C-F</sub> = 11.7, ArC), 122.8 (<sup>2</sup>*J*<sub>C-F</sub> = 11.7, ArC), 124.5 (<sup>3</sup>*J*<sub>C-F</sub> = 3.6, Ar-CH=CH-), 124.6 (<sup>3</sup>*J*<sub>C-F</sub> = 3.6, Ar-CH=CH-), 127.5 (<sup>3</sup>*J*<sub>C-F</sub> = 6.2, *1st* ArCH), 127.6 (<sup>3</sup>*J*<sub>C-F</sub> = 6.2, *2nd* ArCH), 129.3 (<sup>3</sup>*J*<sub>C-F</sub> = 2.9, *1st* ArCH), 129.3 (<sup>3</sup>*J*<sub>C-F</sub> = 2.9, *2nd* ArCH), 131.9 (<sup>4</sup>*J*<sub>C-F</sub> = 8.7, *1st* ArCH), 132.0 (<sup>4</sup>*J*<sub>C-F</sub> = 8.7, *2nd* ArCH), 135.9 (Ar-CH=CH-), 160.3 (<sup>1</sup>*J*<sub>C-F</sub> = 254.8 ArC-F), 162.8 (<sup>1</sup>*J*<sub>C-F</sub> = 254.8 ArC-F), 188.7. <sup>19</sup>F NMR (377 MHz, CDCl<sub>3</sub>): δ -114.7.

**1,5-Bis-(2-nitrophenyl)-penta-1,4-(*E,E*)-dien-3-one (P<sub>10</sub>).** Yellow solid. Yield: 57%. <sup>1</sup>H NMR (400 MHz, CDCl<sub>3</sub>): δ 7.00 (2H, d, *J* = 16.0), 7.60 (2H, ddd, *J* = 8.6, 6.9, 1.9), 7.70 – 7.77 (4H, m), 8.10 (2H, dd, *J* = 8.1, 1.4), 8.18 (2H, d, *J* = 15.9). <sup>13</sup>C{<sup>1</sup>H} NMR (101 MHz, CDCl<sub>3</sub>): δ 125.1, 129.2, 130.6, 131.0, 139.4, 148.5, 188.3.

**1,5-Bis-(3-nitrophenyl)-penta-1,4-(*E,E*)-dien-3-one (P<sub>11</sub>).** Brown solid. Yield: 93%. <sup>1</sup>H NMR (400 MHz, DMSO-d<sub>6</sub>): δ 7.58 (2H, d, *J* = 16.1), 7.78 (2H, t, *J* = 7.8), 7.97 (2H, d, *J* = 16.1), 8.27 – 8.33 (4H, m), 8.65 (2H, t, *J* = 2.0). <sup>13</sup>C{<sup>1</sup>H} NMR (101 MHz, DMSO-d<sub>6</sub>): δ 123.4, 125.2, 128.4, 131.0, 135.0, 137.0, 141.3, 148.9, 189.0.

**1,5-Bis-(2,5-dimethoxyphenyl)-penta-1,4-(*E,E*)-dien-3-one (P<sub>12</sub>).** Yellow solid. Yield: 73%. <sup>1</sup>H NMR (400 MHz, CDCl<sub>3</sub>): δ 3.88 (6H, s), 3.93 (6H, s), 6.88 – 7.01 (4H, m), 7.14 – 7.19 (4H, m), 8.03 (2H, d, *J* = 16.2). <sup>13</sup>C{<sup>1</sup>H} NMR (101 MHz, CDCl<sub>3</sub>): δ 55.6, 55.8, 111.3, 112.0, 117.2, 124.4, 127.5, 136.6, 152.9, 153.5, 189.6.

**1,5-Bis-(2,6-dichlorophenyl)-penta-1,4-(*E,E*)-dien-3-one (P<sub>13</sub>).** Yellow solid. Yield: 65%. <sup>1</sup>H NMR (400 MHz, DMSO-*d*<sub>6</sub>): δ 7.28 (2H, d, *J* = 16.4), 7.44 (2H, dd, *J* = 7.5, 1.2), 7.59 (4H, d, *J* = 8.4), 7.74 (2H, d, *J* = 16.4). <sup>13</sup>C{<sup>1</sup>H} NMR (101 MHz, DMSO-*d*<sub>6</sub>): δ 129.6, 131.6, 132.3, 133.7, 134.5, 137.4, 188.5.

**1,5-Bis-(naphthalen-1-yl)-penta-1,4-(*E,E*)-dien-3-one (P<sub>14</sub>).** Yellow solid. Yield: 71%. <sup>1</sup>H NMR (400 MHz, CDCl<sub>3</sub>): δ 7.27 (2H, d, *J* = 15.6), 7.56 – 7.66 (6H, m), 7.92 – 7.97 (6H, m), 8.31 (2H, d, *J* = 8.6), 8.68 (2H, d, *J* = 15.8). <sup>13</sup>C{<sup>1</sup>H} NMR (101 MHz, CDCl<sub>3</sub>): δ 123.5, 125.2, 125.5, 126.3, 127.0, 128.1, 128.9, 130.8, 131.8, 132.3, 133.8, 140.4, 188.7.

**1,5-Bis-(anthracen-9-yl)-penta-1,4-(*E,E*)-dien-3-one (P<sub>15</sub>).** Yellow solid. Yield: 66%. <sup>1</sup>H NMR (400 MHz, CDCl<sub>3</sub>): δ 7.21 (2H, d, *J* = 16.2), 7.50 – 7.57 (8H, m), 8.05 (4H, d, *J* = 8.1), 8.35 (4H, d, *J* = 8.5), 8.50 (2H, s), 8.82 (2H, d, *J* = 16.1). <sup>13</sup>C{<sup>1</sup>H} NMR (101 MHz, CDCl<sub>3</sub>): δ 123.5, 125.7, 129.1, 129.3, 131.0, 132.1, 135.2, 148.5, 192.9.

**(1*E*,3*E*,6*E*,8*E*)-1,9-diphenylnona-1,3,6,8-tetraen-5-one (P<sub>16</sub>).** Yellow solid. Yield: 67%. <sup>1</sup>H NMR (400 MHz, CDCl<sub>3</sub>): δ 6.60 (2H, d, *J* = 15.1), 6.94 – 7.02 (4H, m), 7.33 – 7.43 (6H, m), 7.47 – 7.55 (6H, m). <sup>13</sup>C{<sup>1</sup>H} NMR (101 MHz, CDCl<sub>3</sub>): δ 127.0, 127.3, 128.9, 129.1, 129.2, 136.2, 141.5, 143.1, 189.0.

**1,5-Bis-(4-cyanophenyl)-penta-1,4-(*E,E*)-dien-3-one (P<sub>17</sub>).** Yield: 0%.

**1,5-Bis-(4-(dimethylamino)phenyl)-penta-1,4-(*E,E*)-dien-3-one (P<sub>18</sub>).** Red solid. Yield: 77%. <sup>1</sup>H NMR (400 MHz, CDCl<sub>3</sub>): δ 3.05 (12H, s), 6.71 (4H, d, *J* = 9.0), 6.91 (2H, d, *J* = 15.7), 7.54 (4H, d, *J* = 9.0), 7.71 (2H, d, *J* = 15.7). <sup>13</sup>C{<sup>1</sup>H} NMR (101 MHz, CDCl<sub>3</sub>): δ 40.2, 111.9, 121.4, 123.0, 130.1, 143.0, 151.8, 188.9.

**1,5-Bis-(pyridin-2-yl)-penta-1,4-(*E,E*)-dien-3-one (P<sub>19</sub>).** Yellow solid. Yield: 26%. <sup>1</sup>H NMR (400 MHz, CD<sub>3</sub>OD): δ 7.44 (2H, dd, *J* = 8.4, 5.2), 7.61 (2H, d, *J* = 15.9), 7.75 – 7.80 (4H, m), 7.90 (2H, td, *J* = 7.8, 2.5), 8.63 (2H, d, *J* = 4.7). <sup>13</sup>C{<sup>1</sup>H} NMR (101 MHz, DMSO-*d*<sub>6</sub>): δ 124.3, 131.9, 137.6, 141.2, 148.6, 150.8, 155.7, 188.0.

**1,5-Bis-(2-hydroxyphenyl)-penta-1,4-(*E,E*)-dien-3-one (P<sub>20</sub>).** Yellow solid. Yield: 56%. <sup>1</sup>H NMR (400 MHz, CDCl<sub>3</sub>): δ 6.85 (2H, t, *J* = 7.4), 6.95 (2H, d, *J* = 8.4), 7.24 –

7.30 (4H, m), 7.69 (2H, dd,  $J = 8.2, 1.6$ ), 7.92 (2H, d,  $J = 16.0$ ).  $^{13}\text{C}\{^1\text{H}\}$  NMR (101 MHz,  $\text{CDCl}_3$ ):  $\delta$  116.9, 120.0, 121.9, 125.9, 129.3, 138.5, 157.7, 189.2.

**1,5-Bis-(pyrrol-2-yl)-penta-1,4-(*E,E*)-dien-3-one (P<sub>21</sub>).** Yield: 0%.

**1,5-Bis-(2-hydroxynaphthalen-1-yl)-penta-1,4-(*E,E*)-dien-3-one (P<sub>22</sub>).** Yield: 0%.

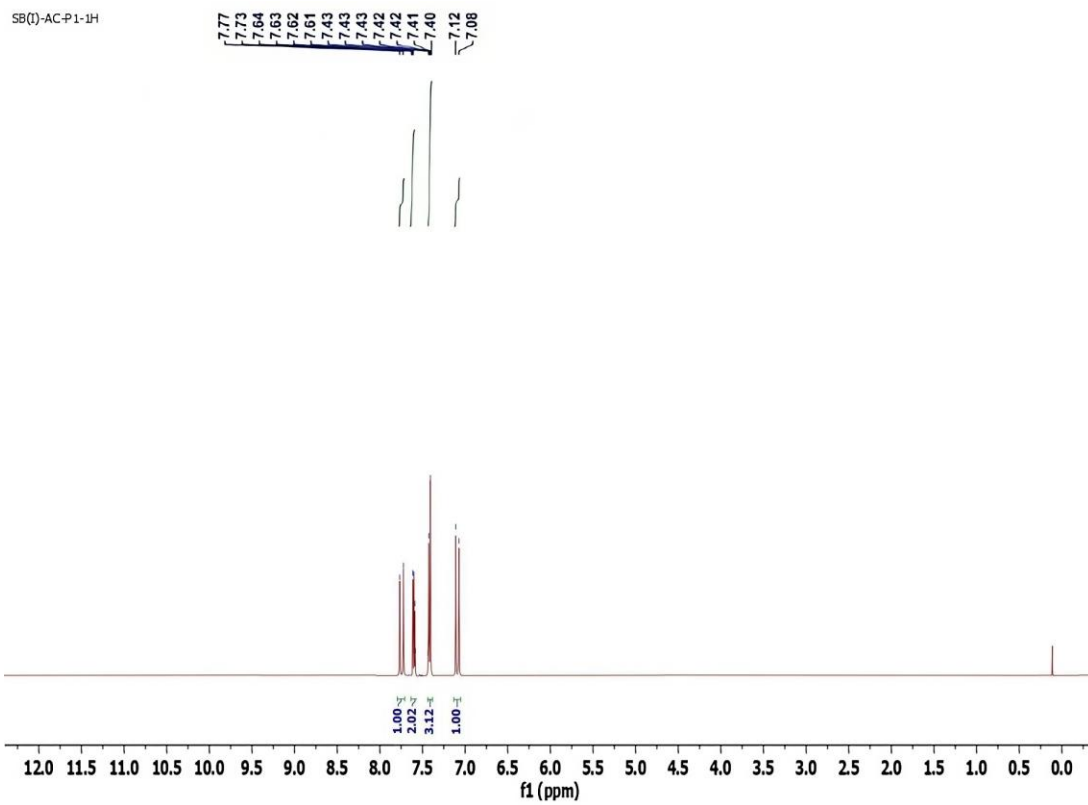

$^1\text{H}$  NMR spectrum of **P**<sub>1</sub> in  $\text{CDCl}_3$

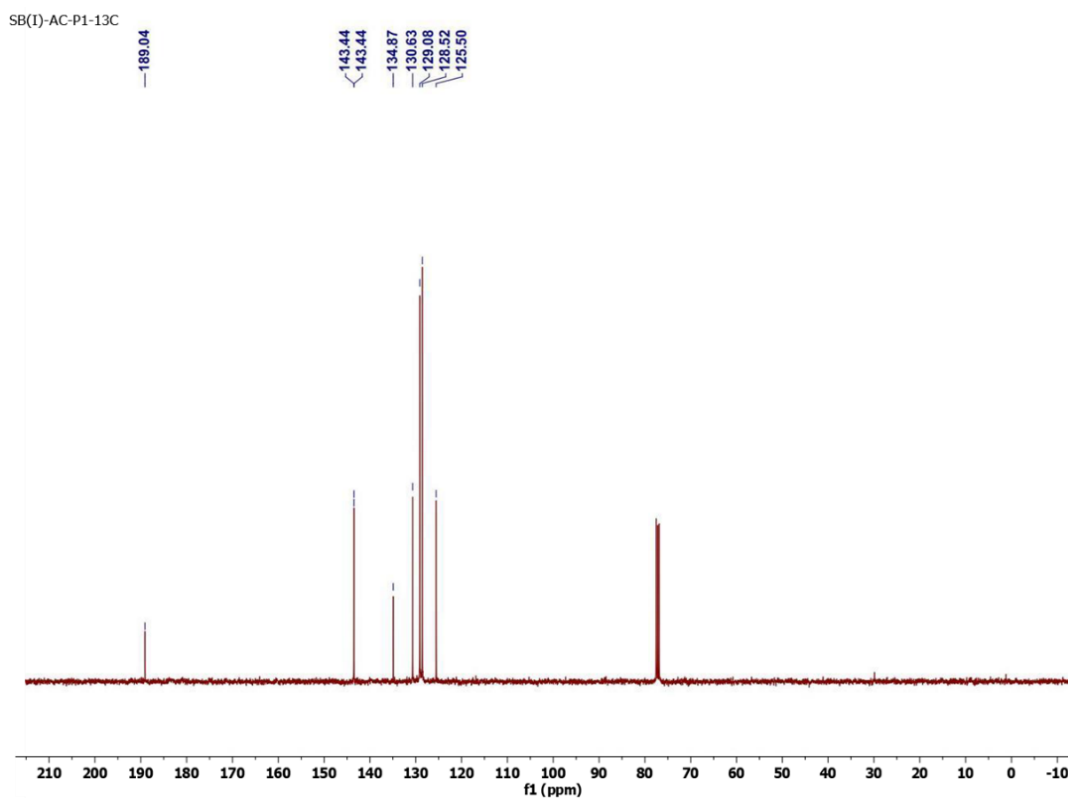

$^{13}\text{C}$  NMR spectrum of **P**<sub>1</sub> in  $\text{CDCl}_3$

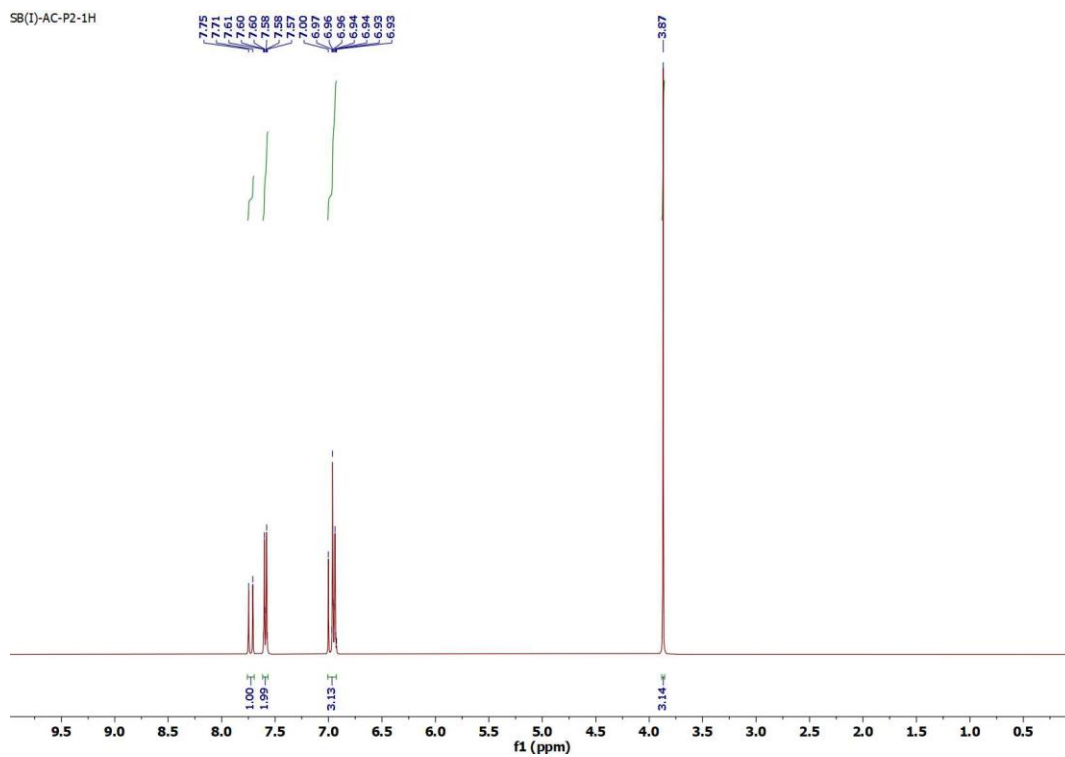

$^1\text{H}$  NMR spectrum of  $\text{P}_2$  in  $\text{CDCl}_3$

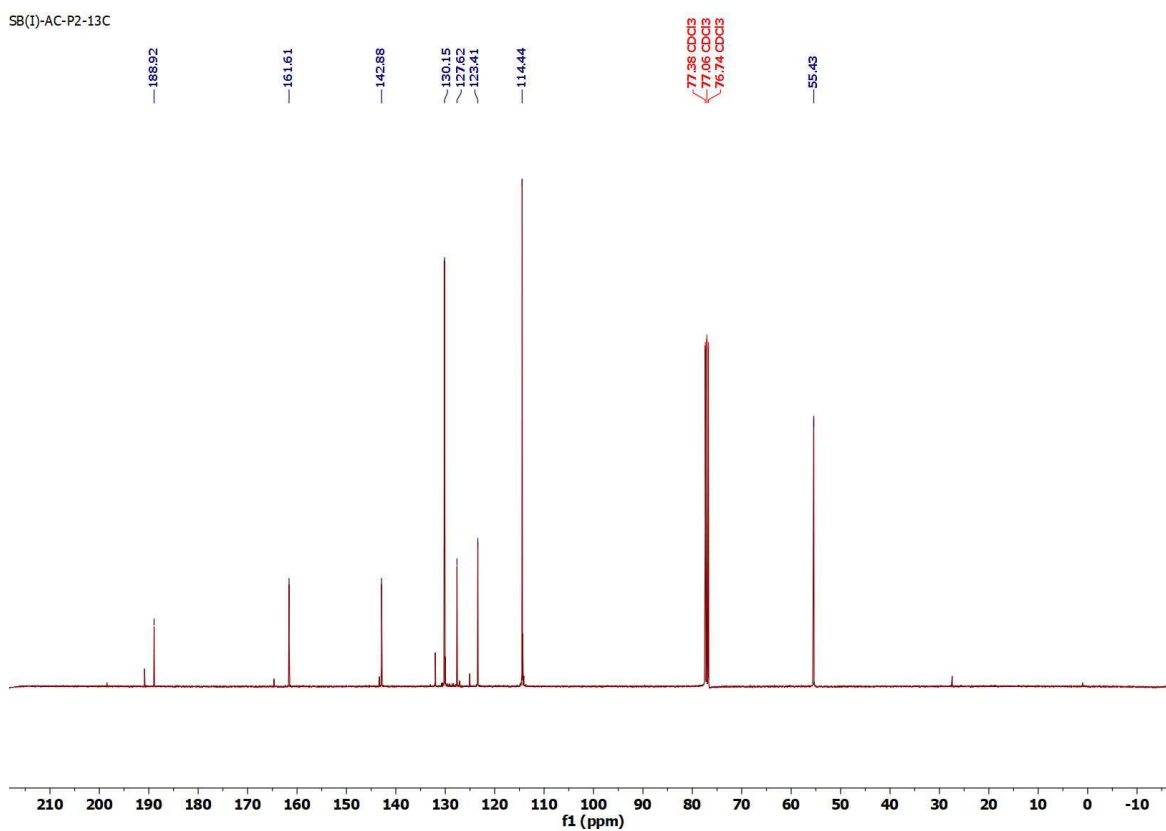

$^{13}\text{C}$  NMR spectrum of  $\text{P}_2$  in  $\text{CDCl}_3$



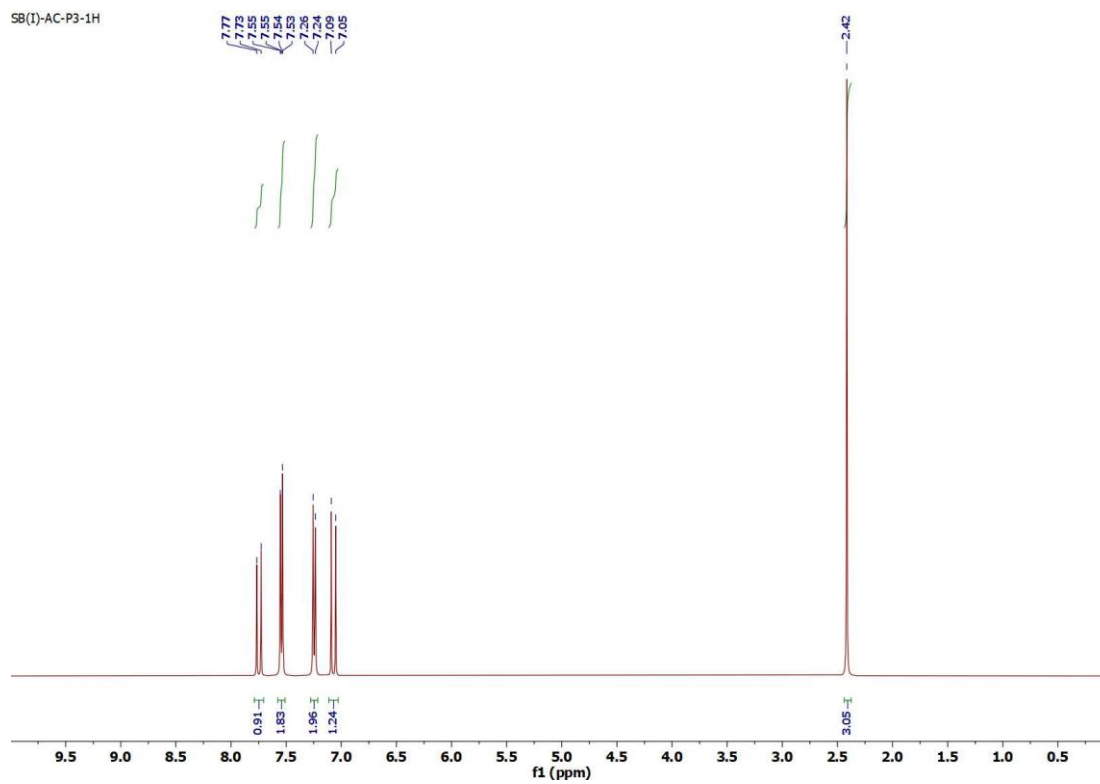

$^1\text{H}$  NMR spectrum of  $\text{P}_3$  in  $\text{CDCl}_3$

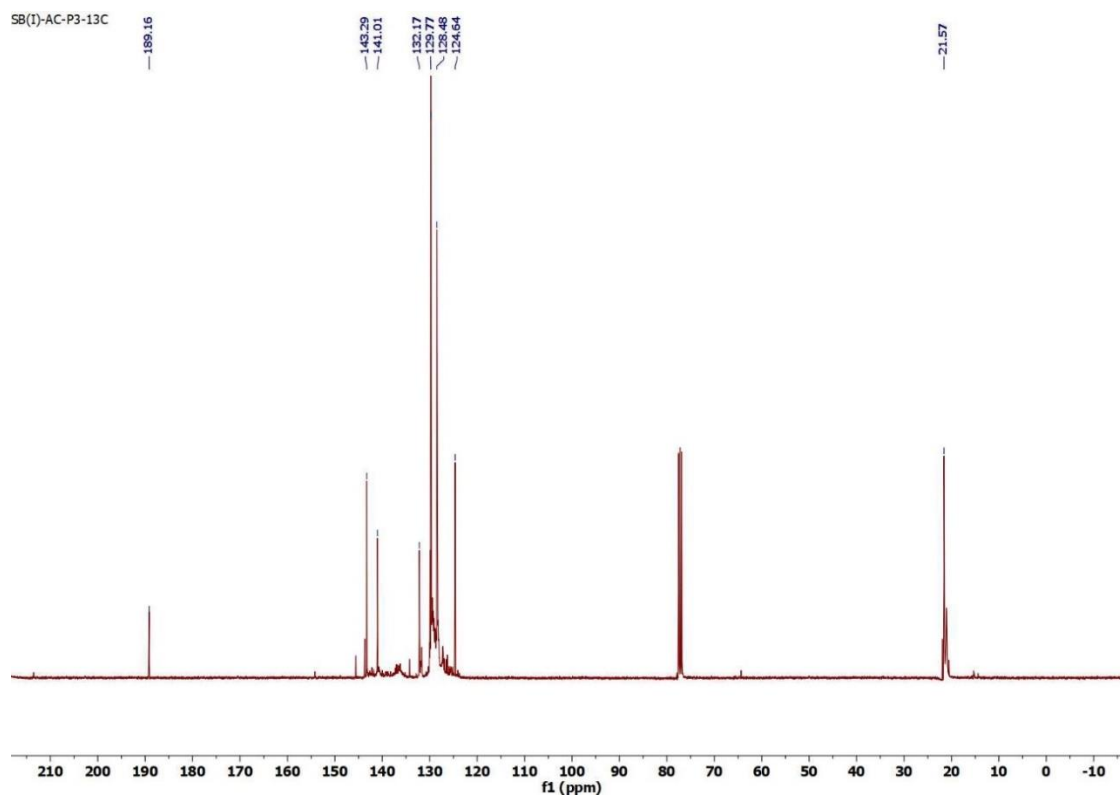

$^{13}\text{C}$  NMR spectrum of  $\text{P}_3$  in  $\text{CDCl}_3$

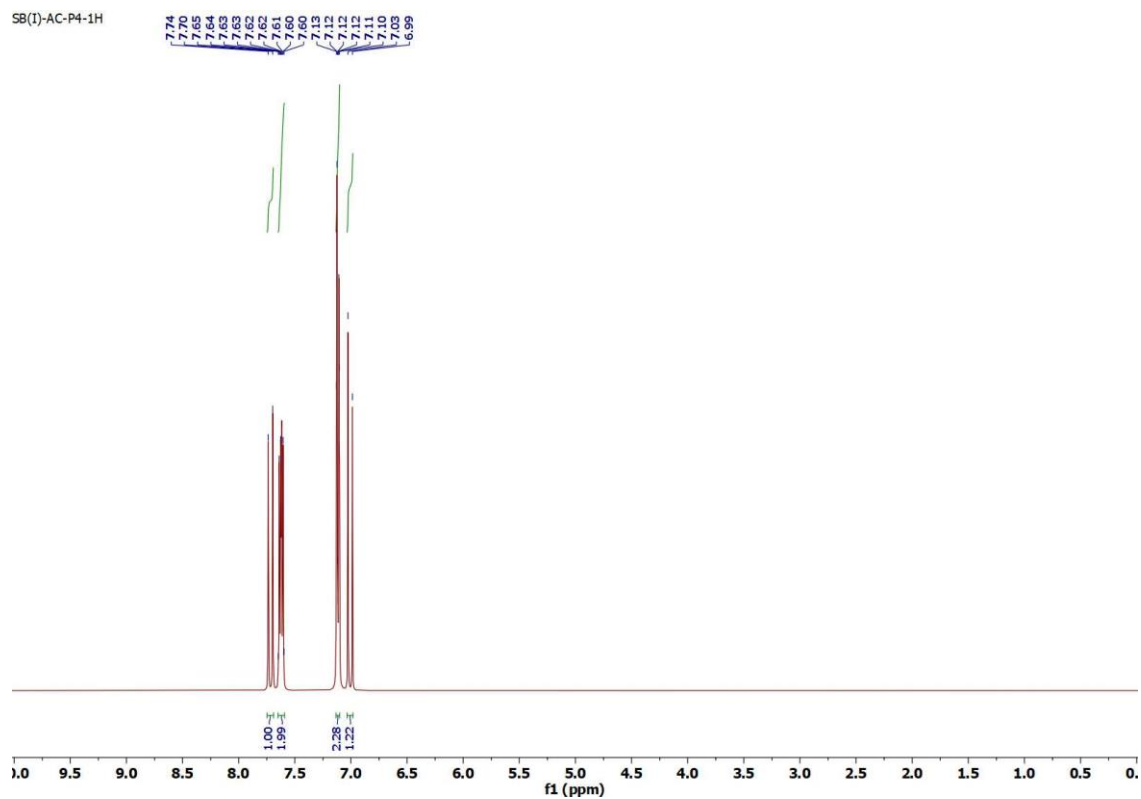

$^1\text{H}$  NMR spectrum of **P**<sub>4</sub> in  $\text{CDCl}_3$

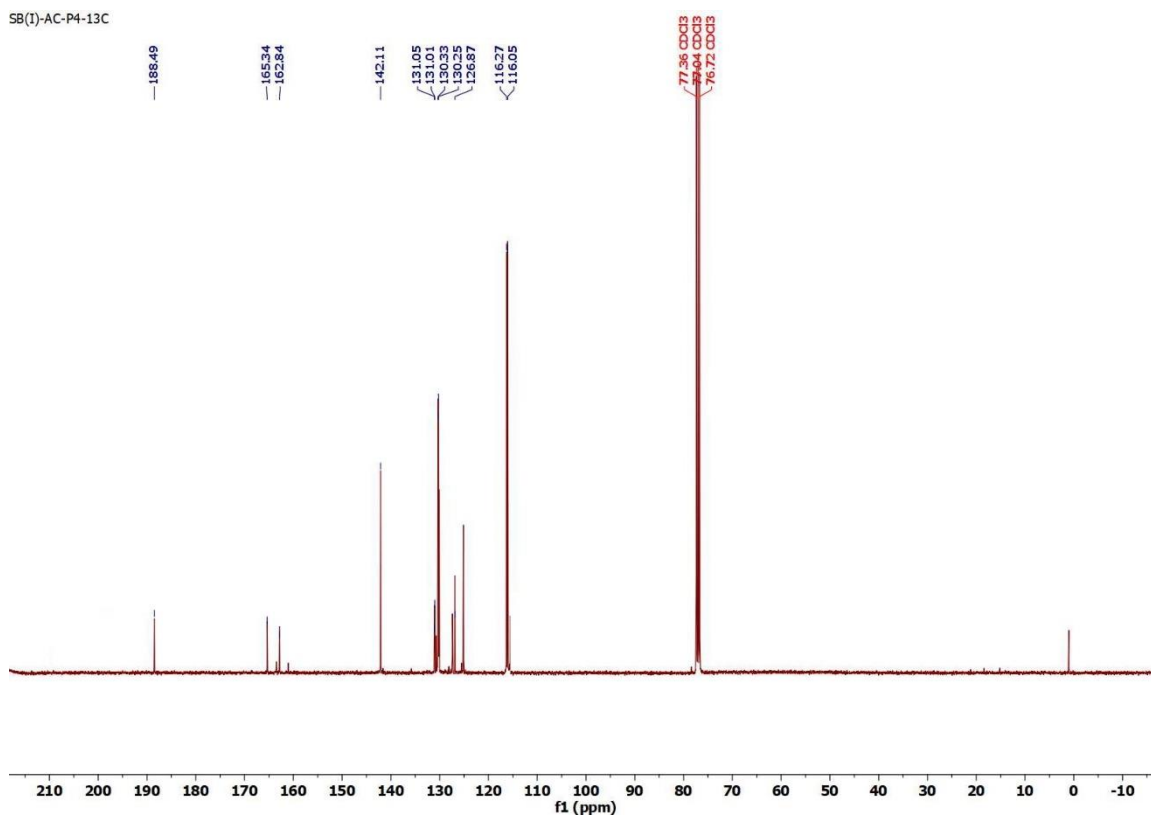

$^{13}\text{C}$  NMR spectrum of **P**<sub>4</sub> in  $\text{CDCl}_3$

SB(I)-AC-P4-19F

-109.05

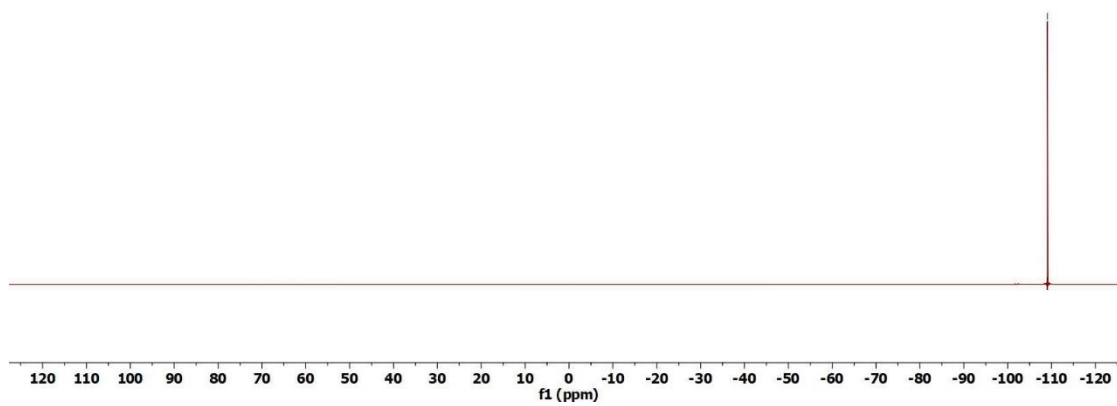 $^{19}\text{F}$  NMR spectrum of  $\text{P}_4$  in  $\text{CDCl}_3$ 

SB(I)-AC-P5-1H

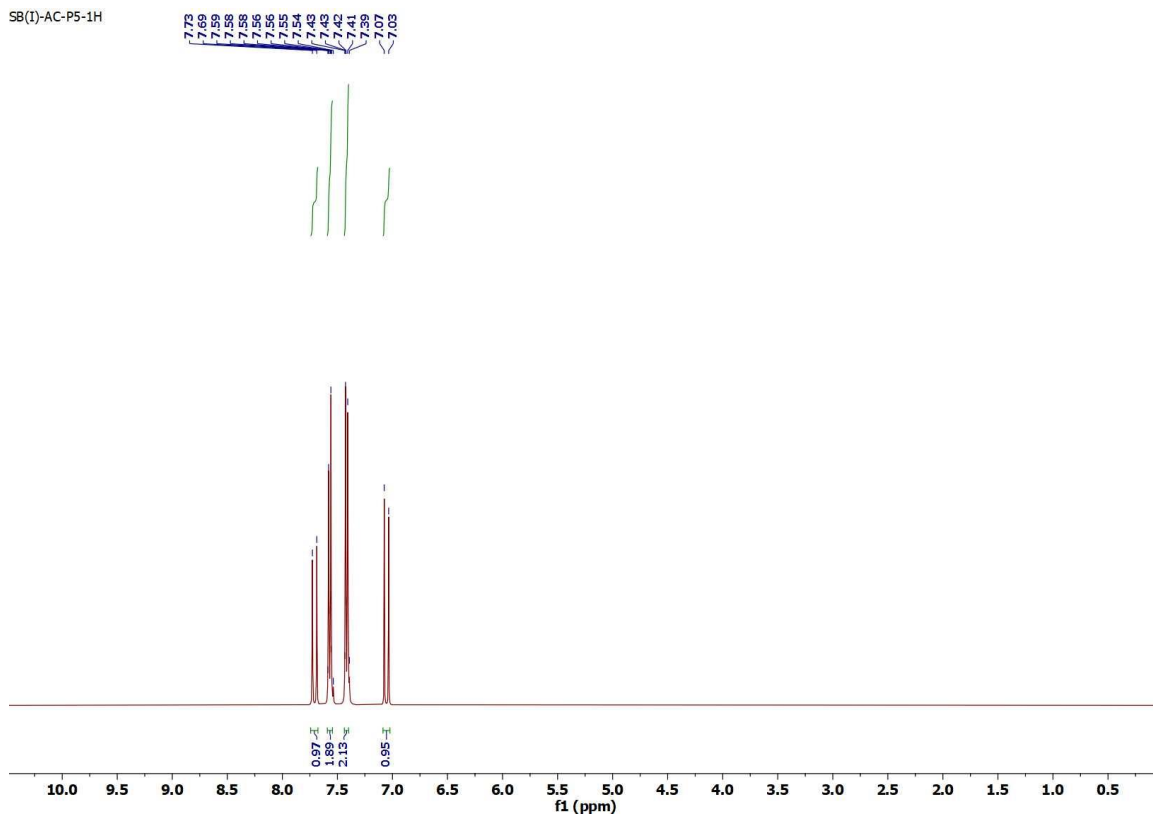 $^1\text{H}$  NMR spectrum of  $\text{P}_5$  in  $\text{CDCl}_3$

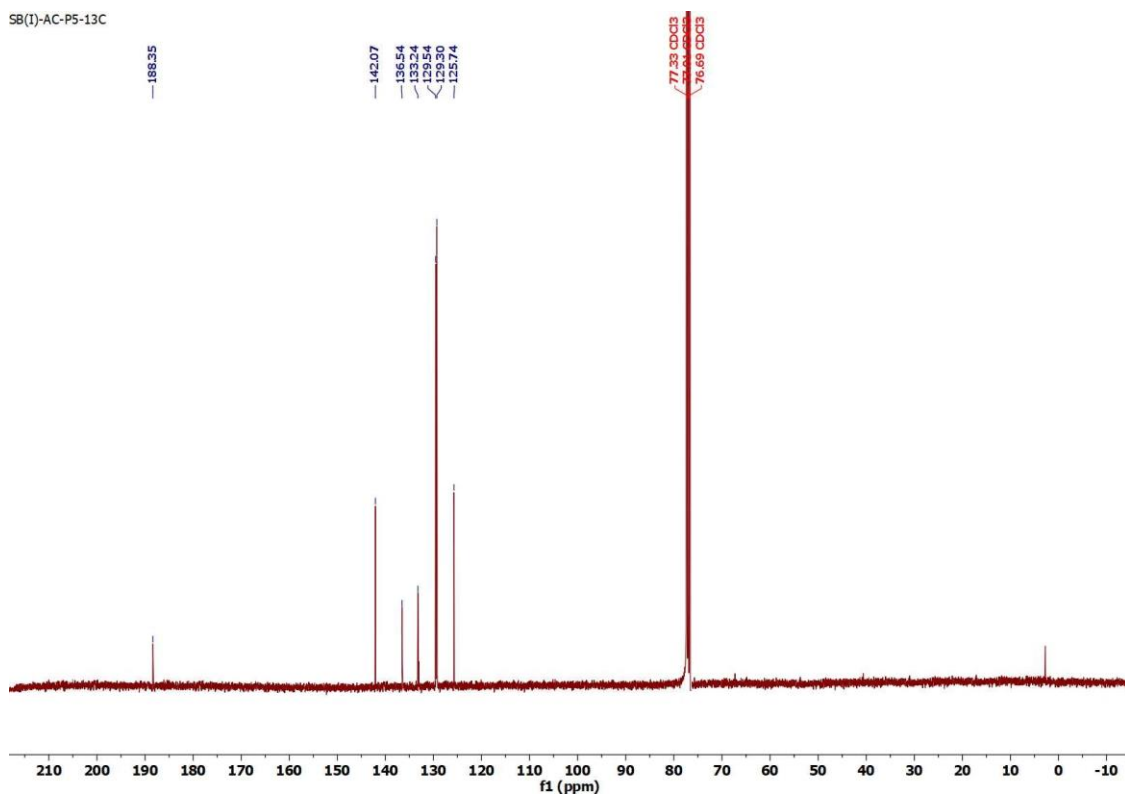

$^{13}\text{C}$  NMR spectrum of **P**<sub>5</sub> in  $\text{CDCl}_3$

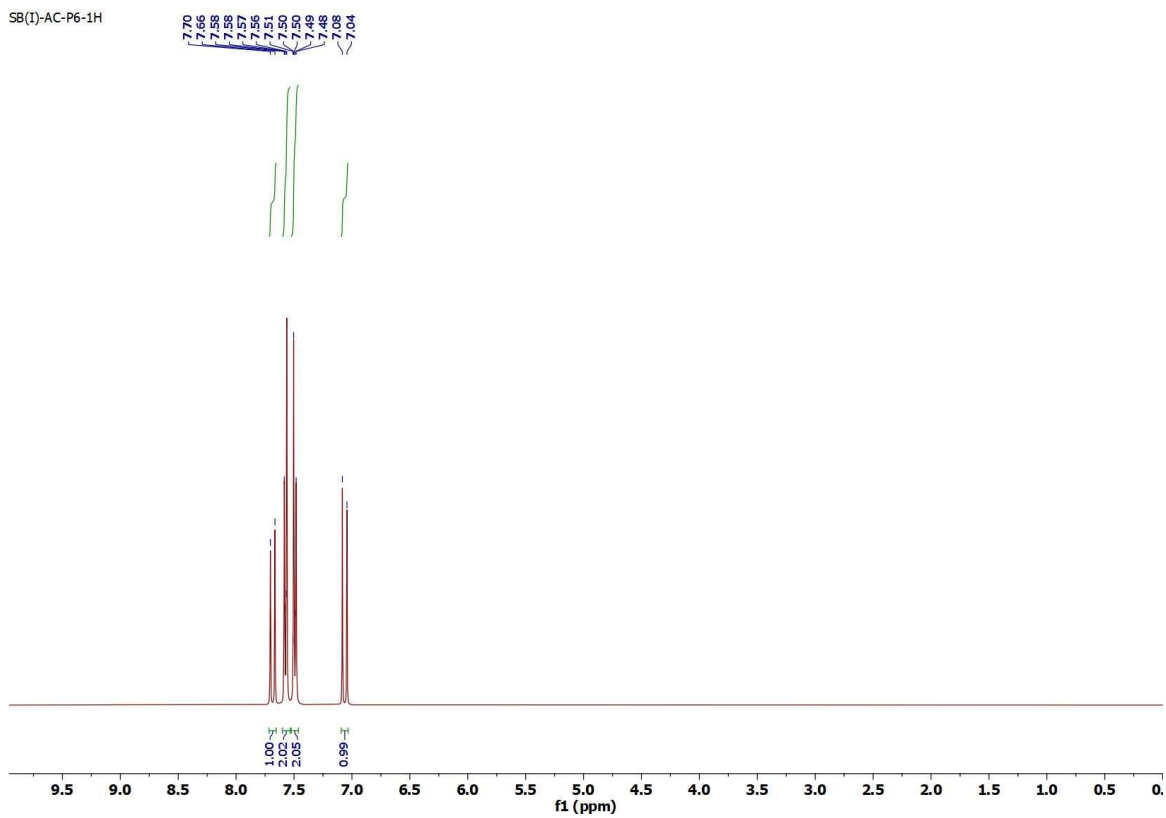

$^1\text{H}$  NMR spectrum of **P**<sub>6</sub> in  $\text{CDCl}_3$

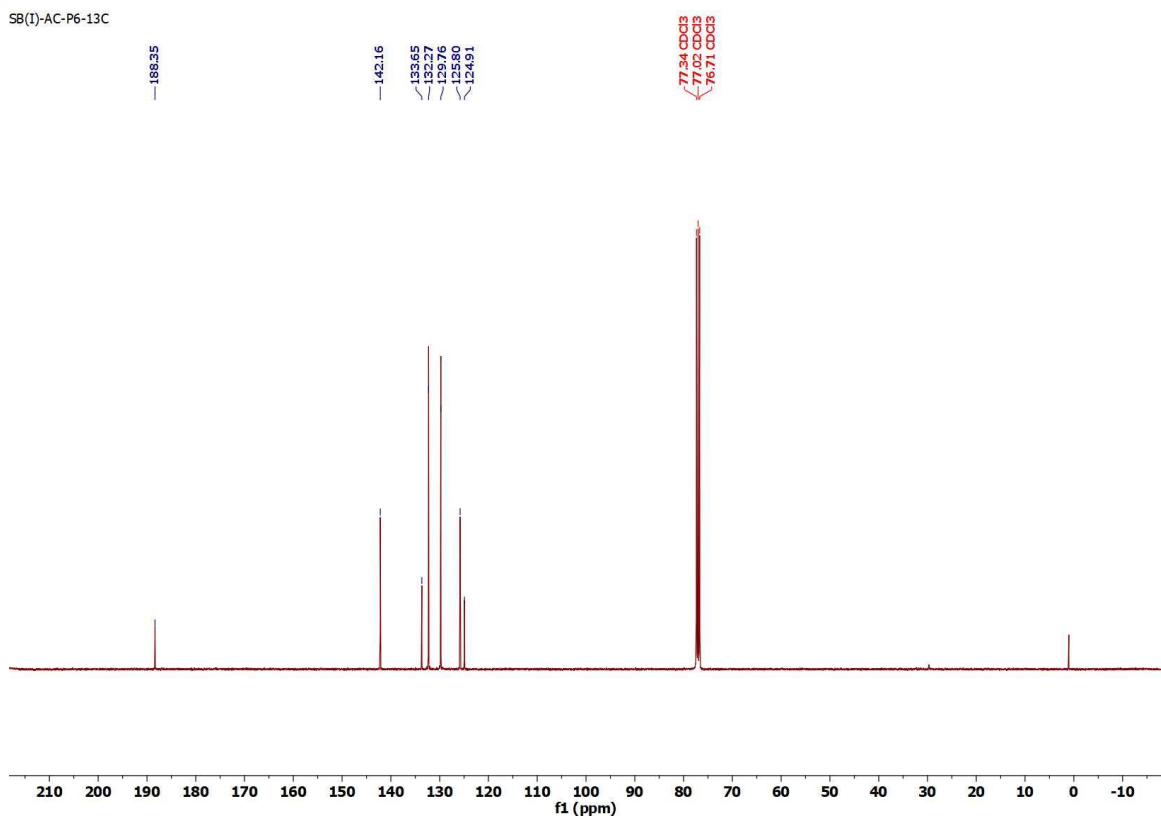

$^{13}\text{C}$  NMR spectrum of **P**<sub>6</sub> in  $\text{CDCl}_3$

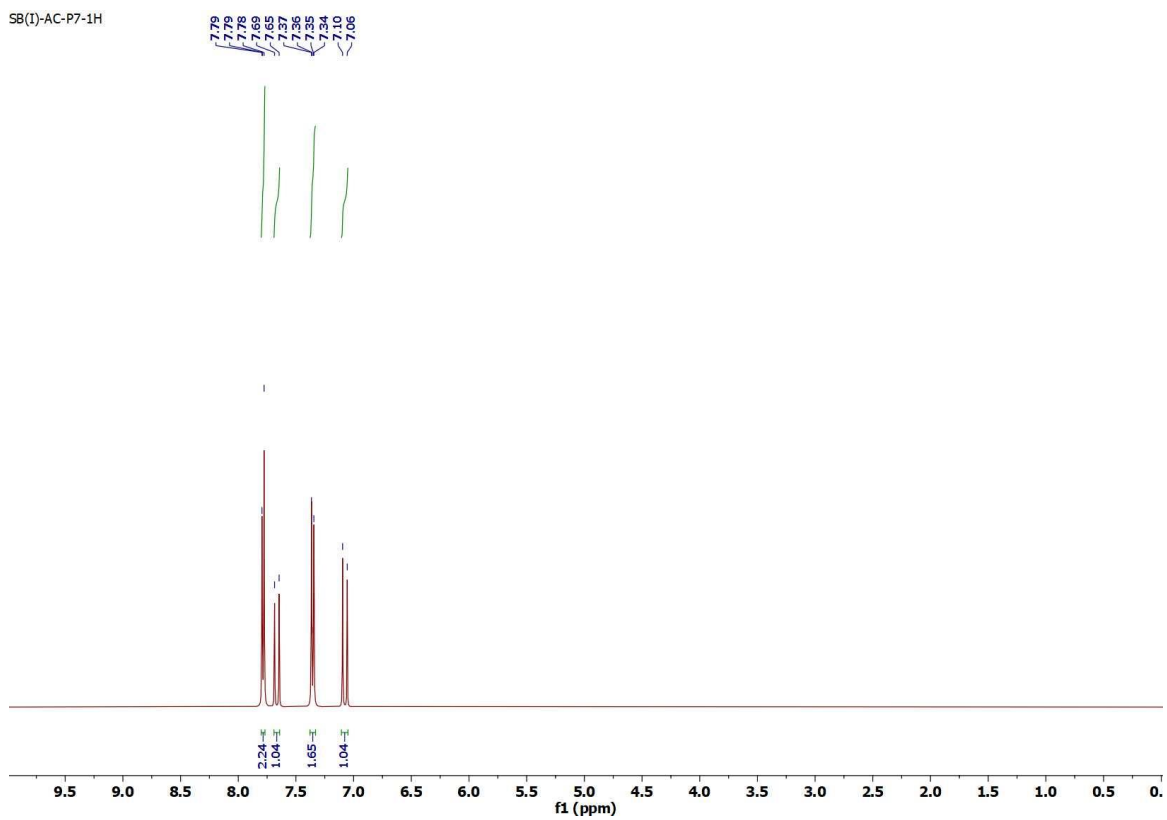

$^1\text{H}$  NMR spectrum of **P**<sub>7</sub> in  $\text{CDCl}_3$

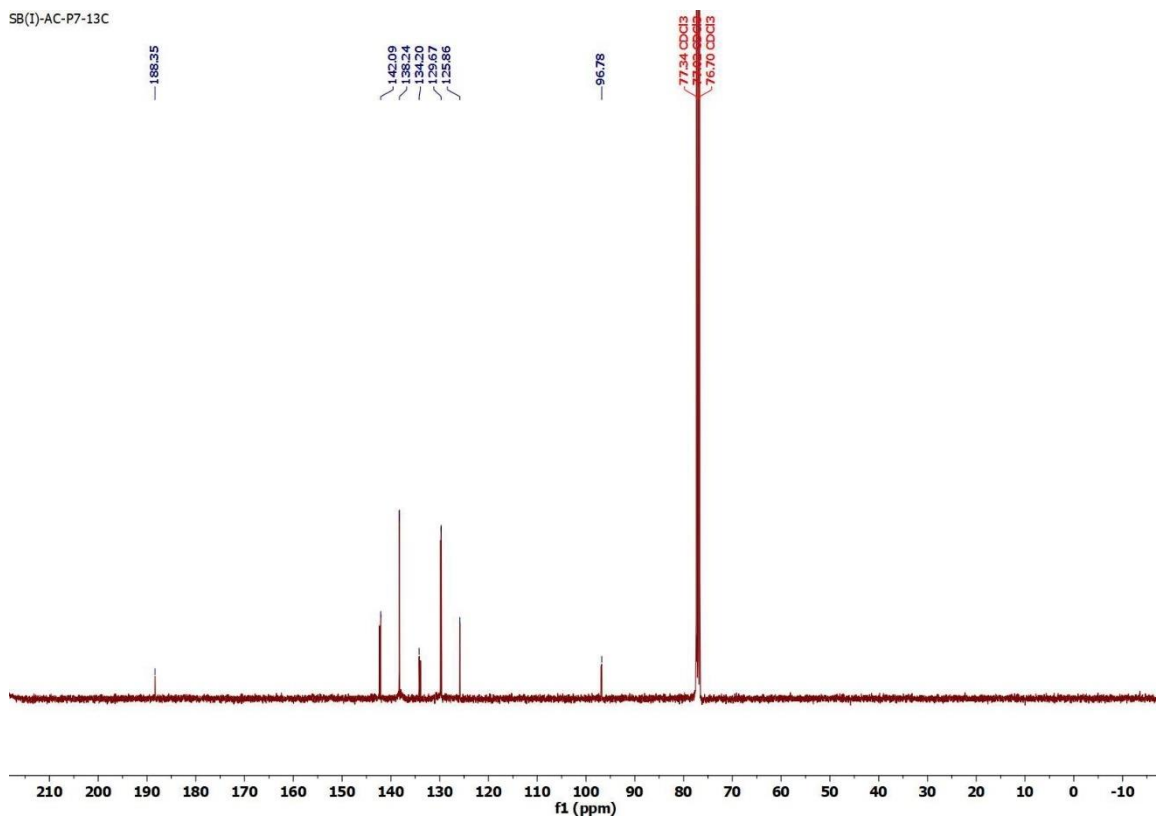

$^{13}\text{C}$  NMR spectrum of **P7** in  $\text{CDCl}_3$

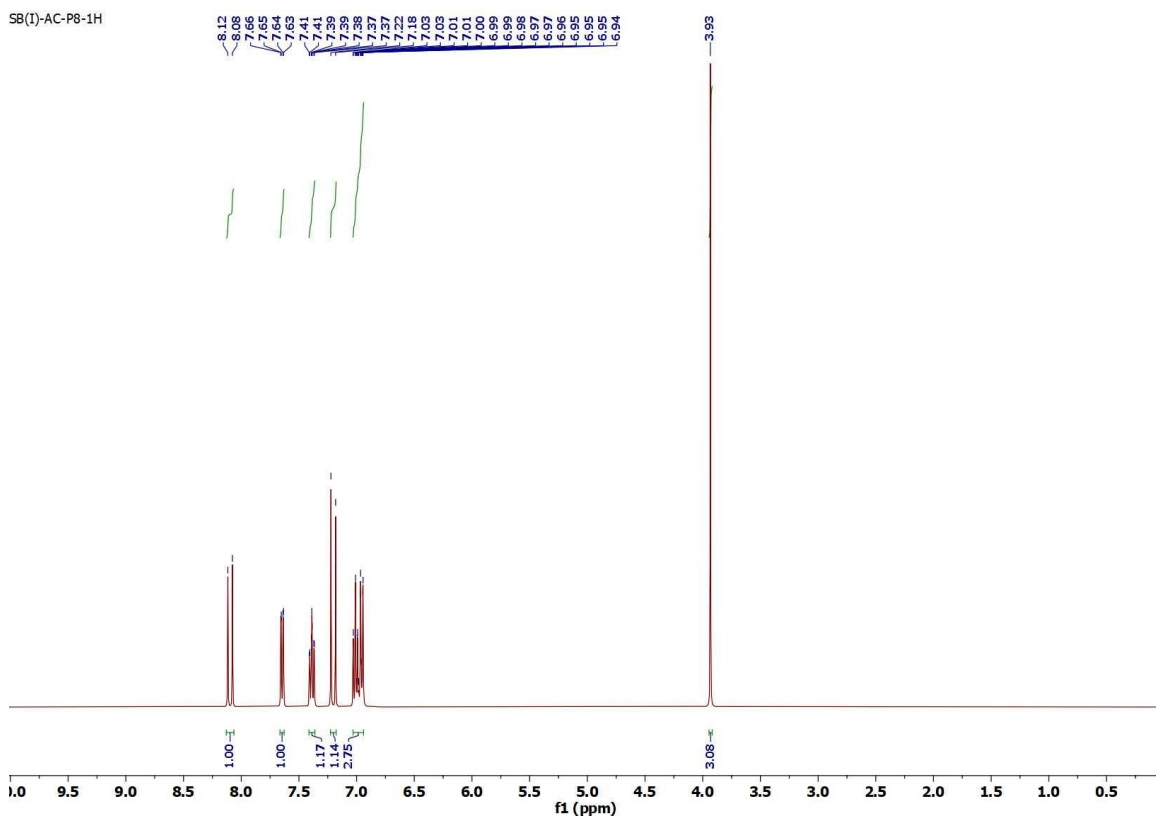

$^1\text{H}$  NMR spectrum of **P8** in  $\text{CDCl}_3$

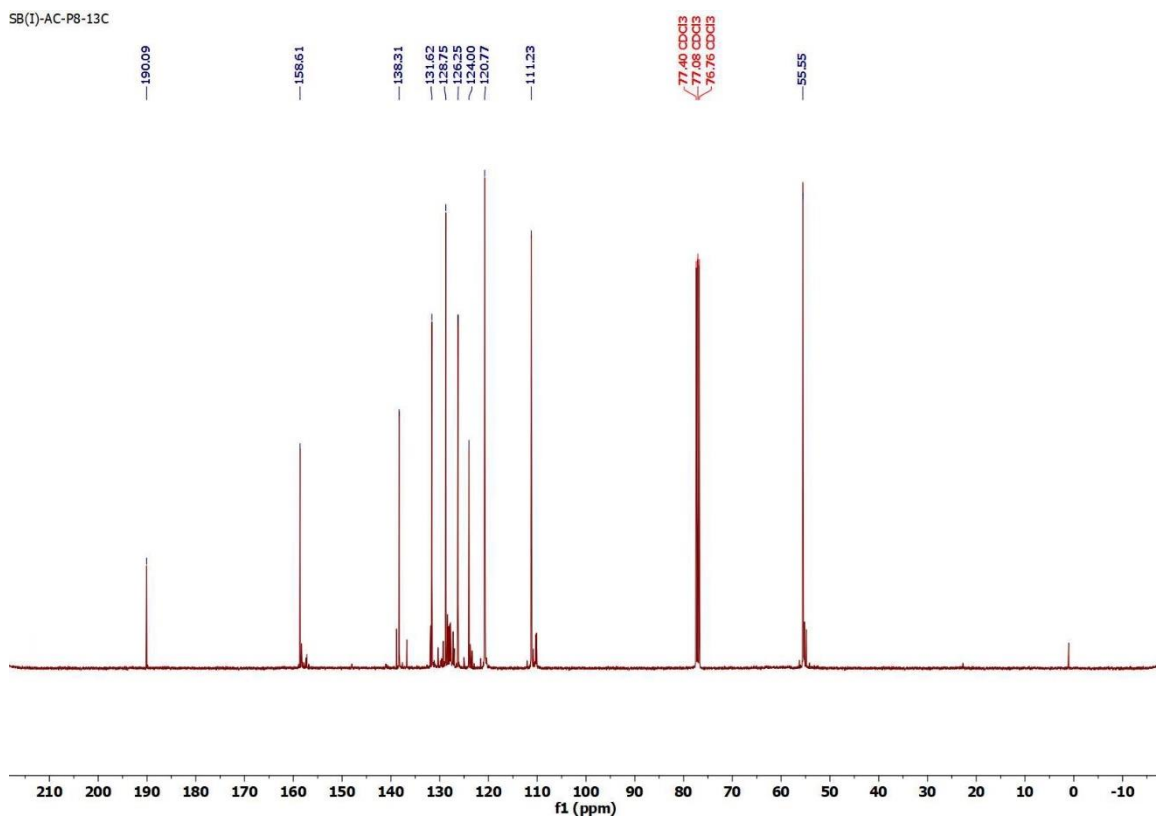

<sup>13</sup>C NMR spectrum of **P**<sub>8</sub> in CDCl<sub>3</sub>

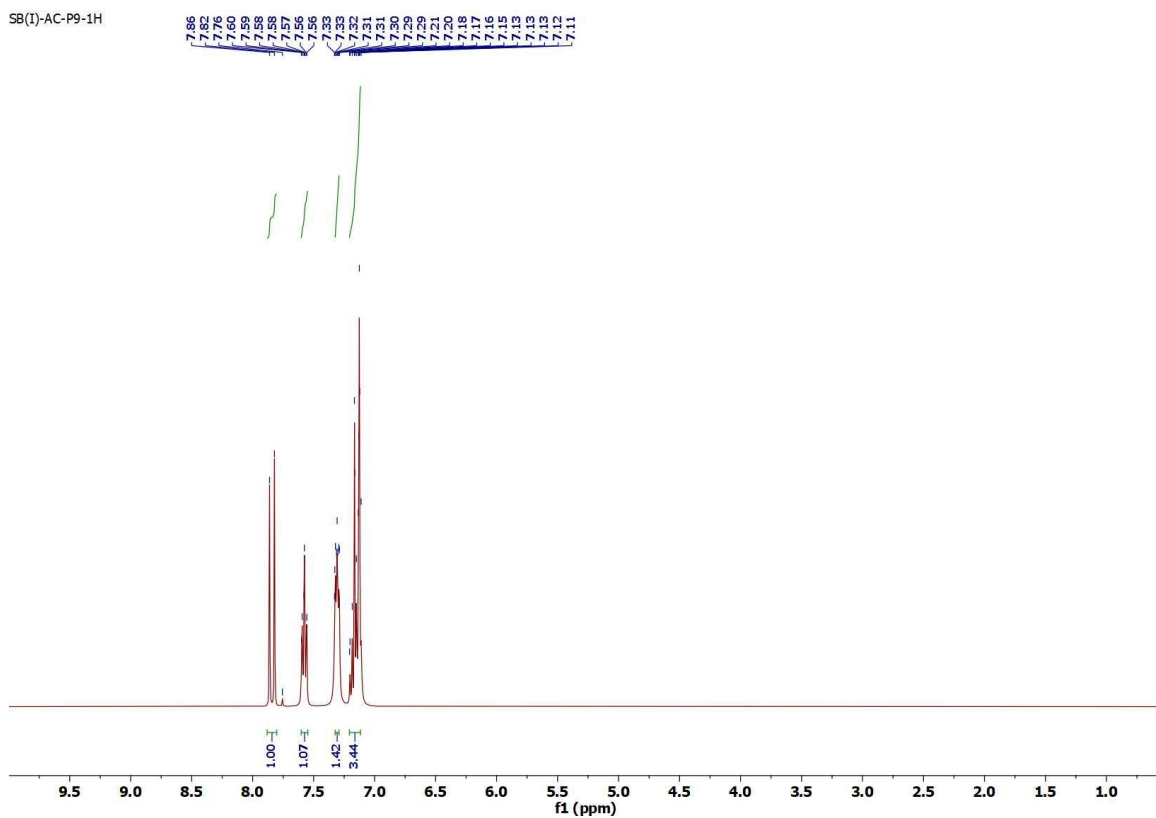

<sup>1</sup>H NMR spectrum of **P**<sub>9</sub> in CDCl<sub>3</sub>

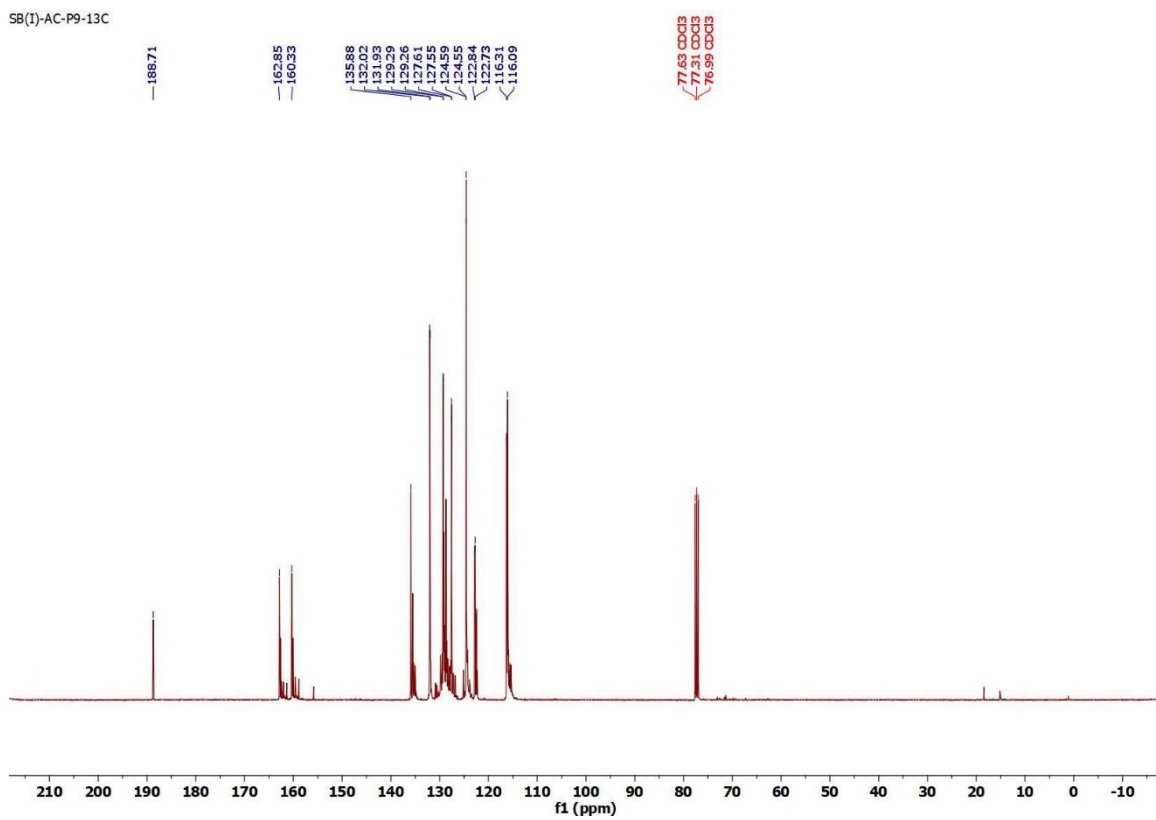

$^{13}\text{C}$  NMR spectrum of **P<sub>9</sub>** in  $\text{CDCl}_3$

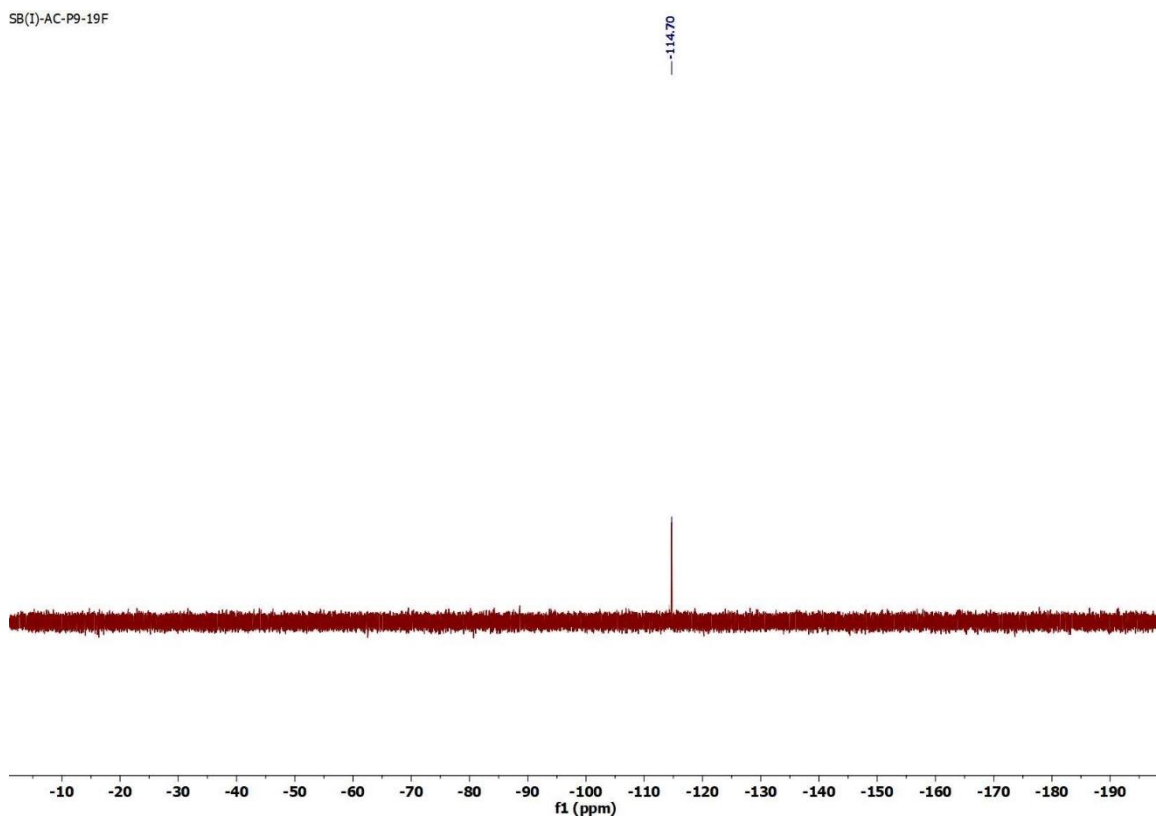

$^{19}\text{F}$  NMR spectrum of **P<sub>9</sub>** in  $\text{CDCl}_3$



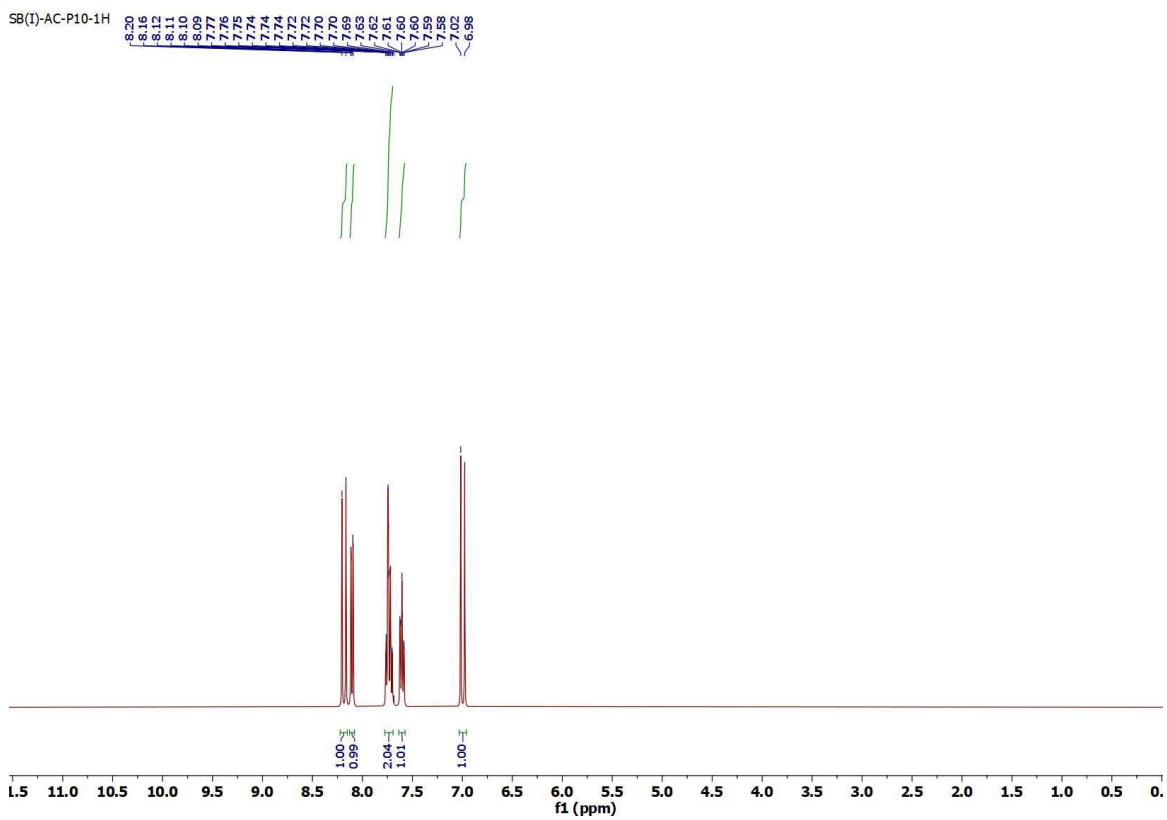

$^1\text{H}$  NMR spectrum of **P**<sub>10</sub> in  $\text{CDCl}_3$

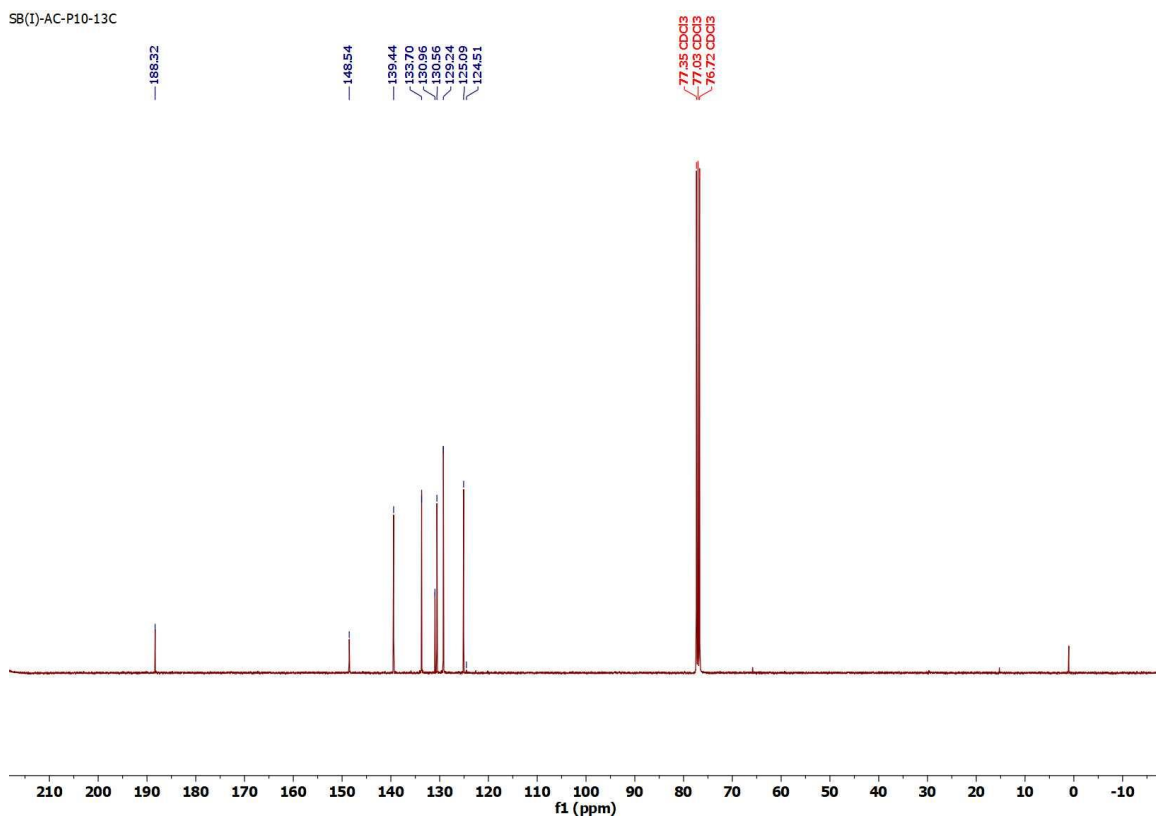

$^{13}\text{C}$  NMR spectrum of **P**<sub>10</sub> in  $\text{CDCl}_3$

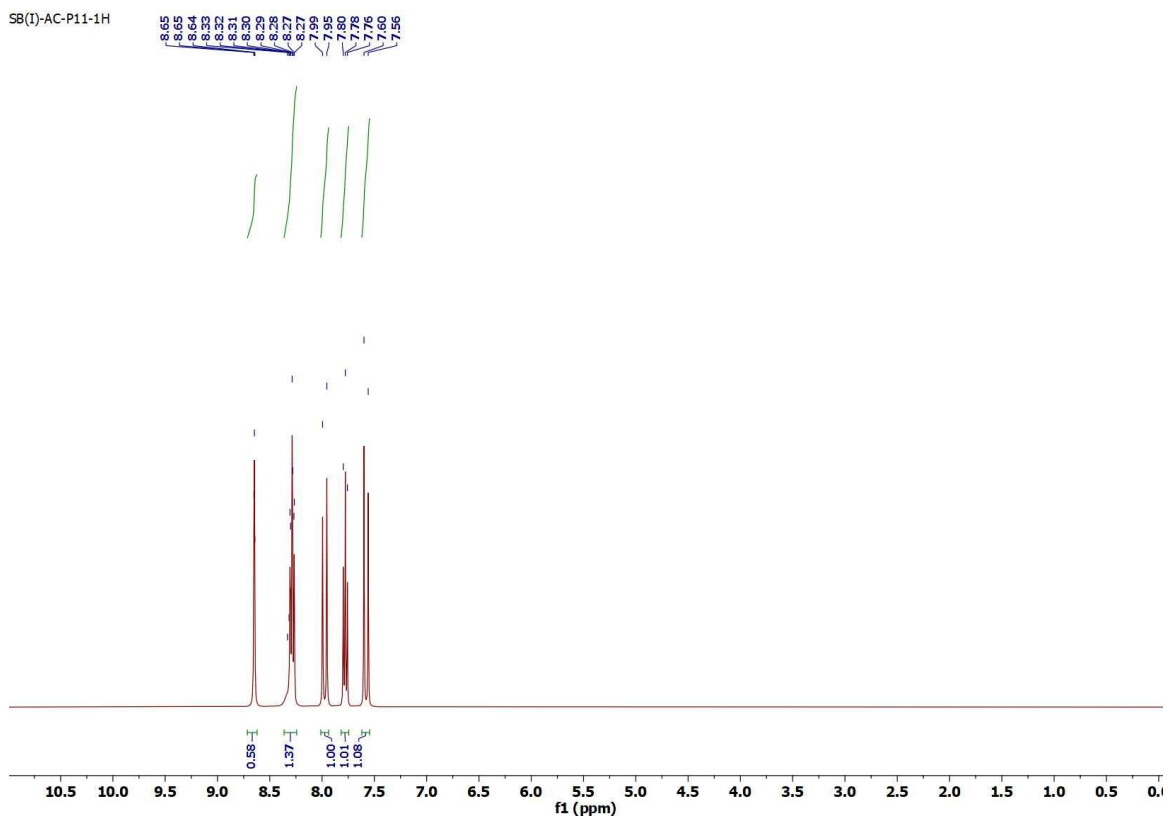

$^1\text{H}$  NMR spectrum of  $\text{P}_{11}$  in  $\text{DMSO-d}_6$

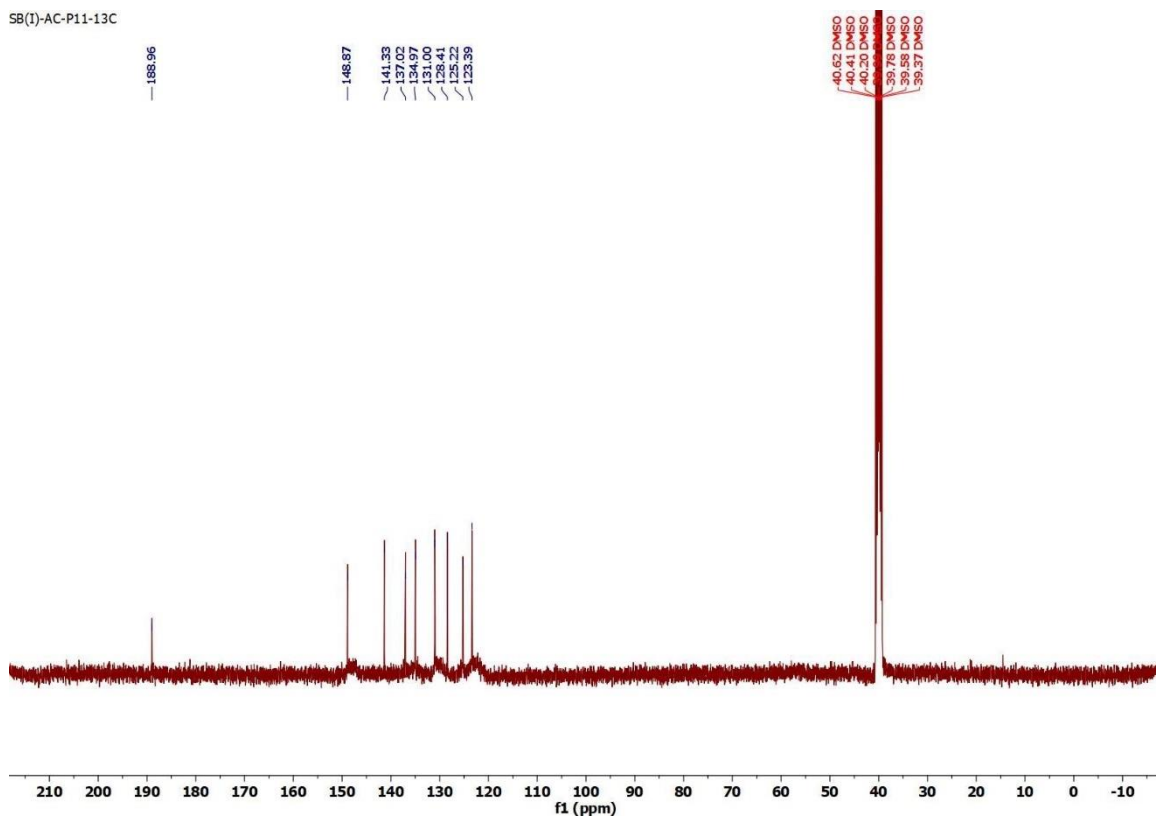

$^{13}\text{C}$  NMR spectrum of  $\text{P}_{11}$  in  $\text{DMSO-d}_6$

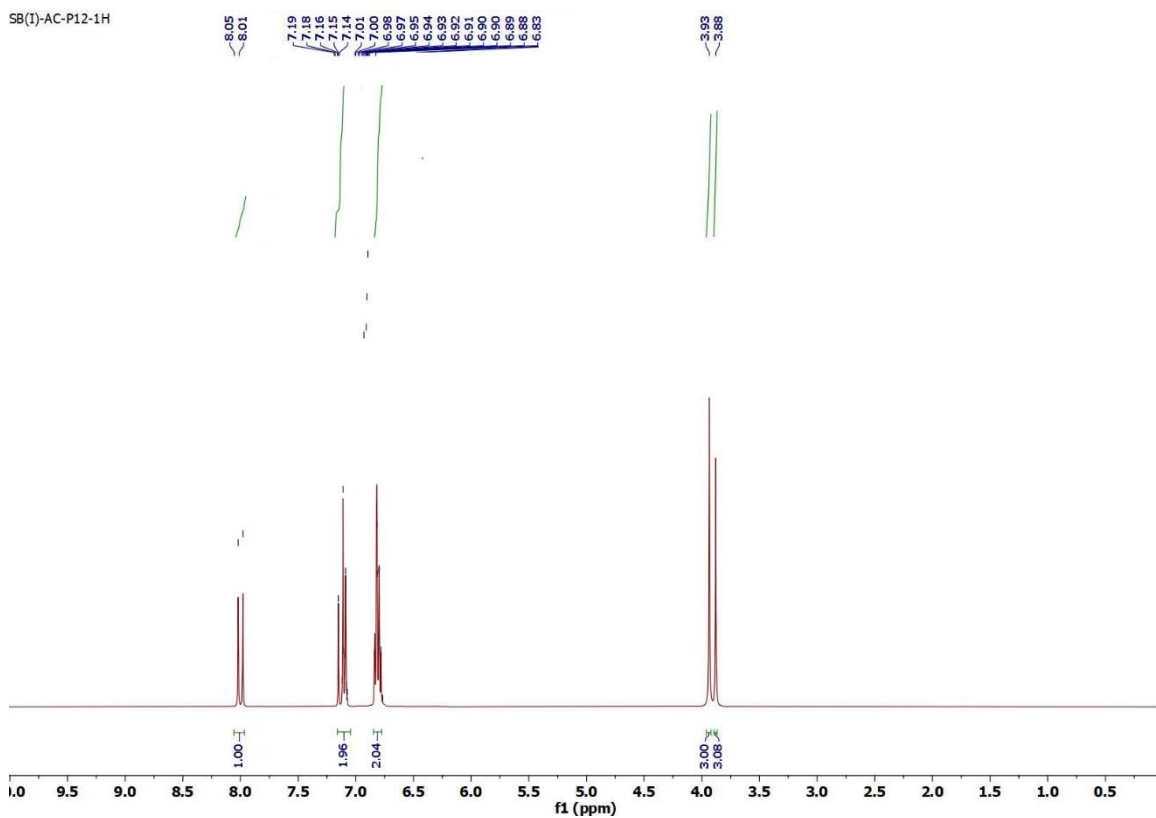

$^1\text{H}$  NMR spectrum of **P**<sub>12</sub> in  $\text{CDCl}_3$

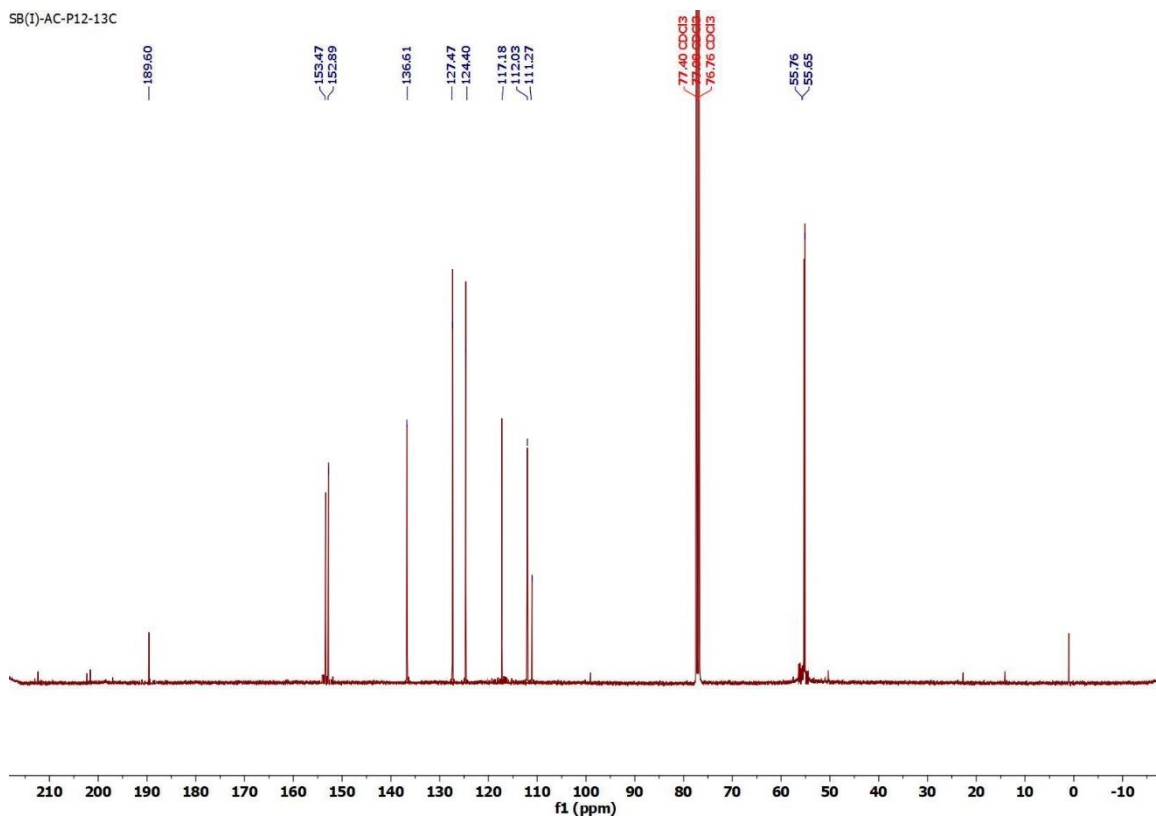

$^{13}\text{C}$  NMR spectrum of **P**<sub>12</sub> in  $\text{CDCl}_3$

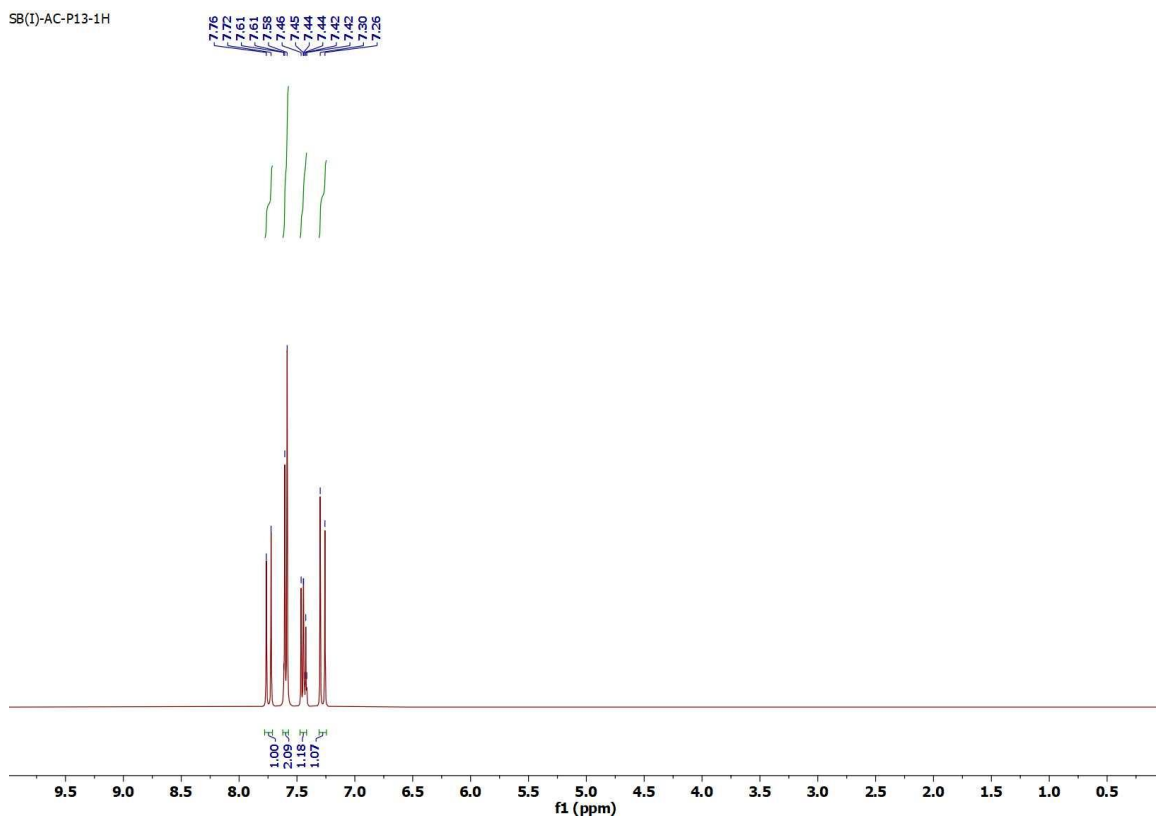

$^1\text{H}$  NMR spectrum of  $\text{P}_{13}$  in  $\text{DMSO-d}_6$

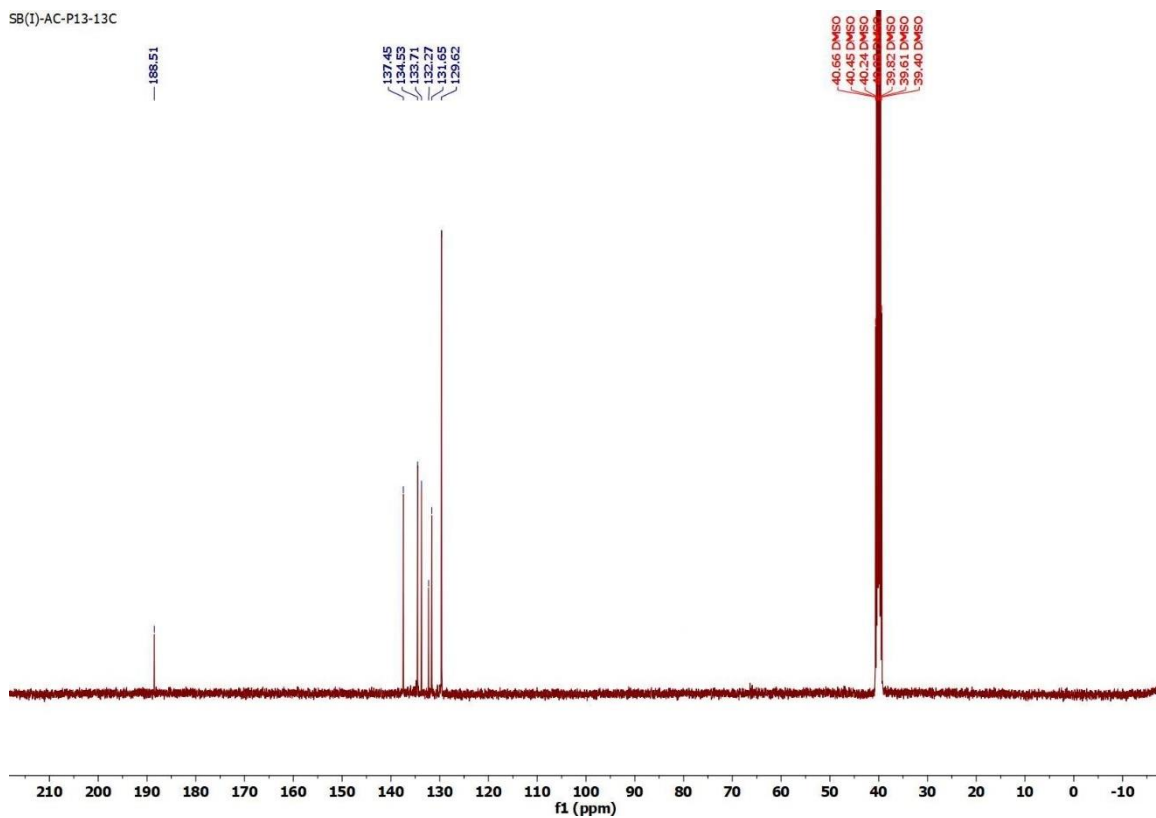

$^{13}\text{C}$  NMR spectrum of  $\text{P}_{13}$  in  $\text{DMSO-d}_6$

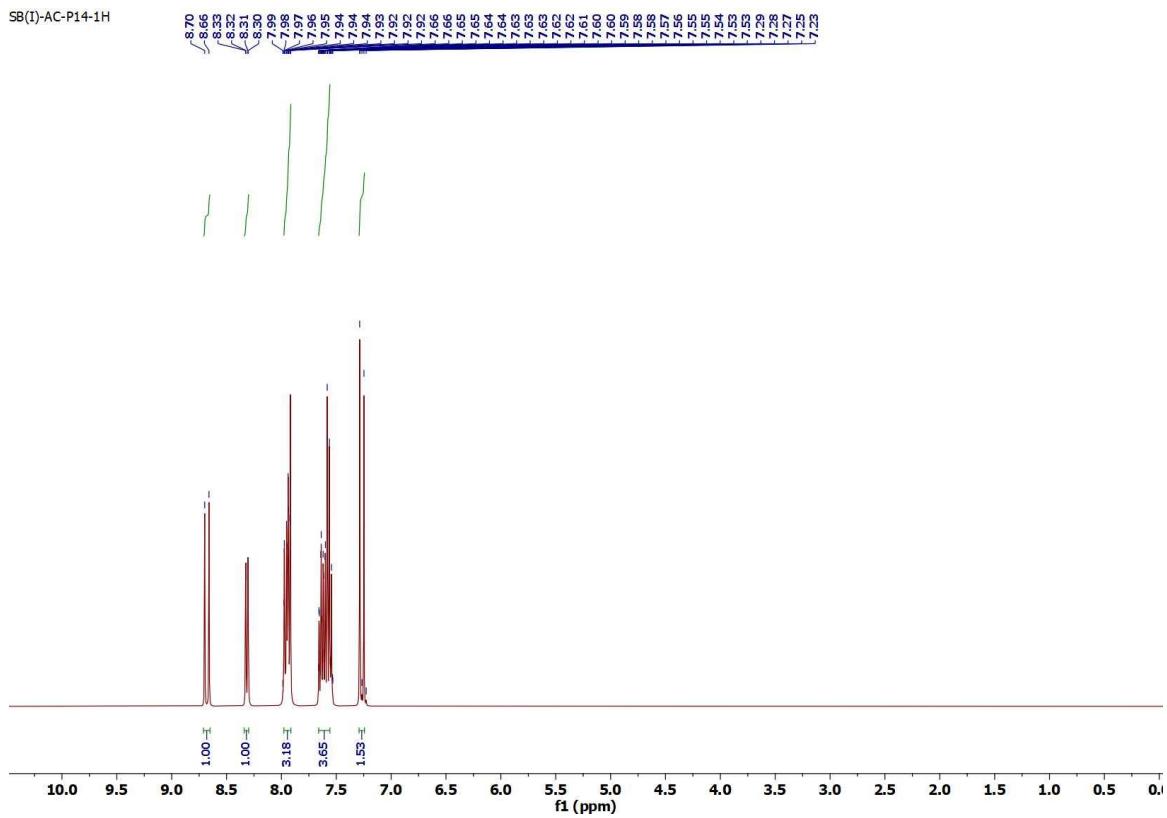

$^1\text{H}$  NMR spectrum of **P14** in  $\text{CDCl}_3$

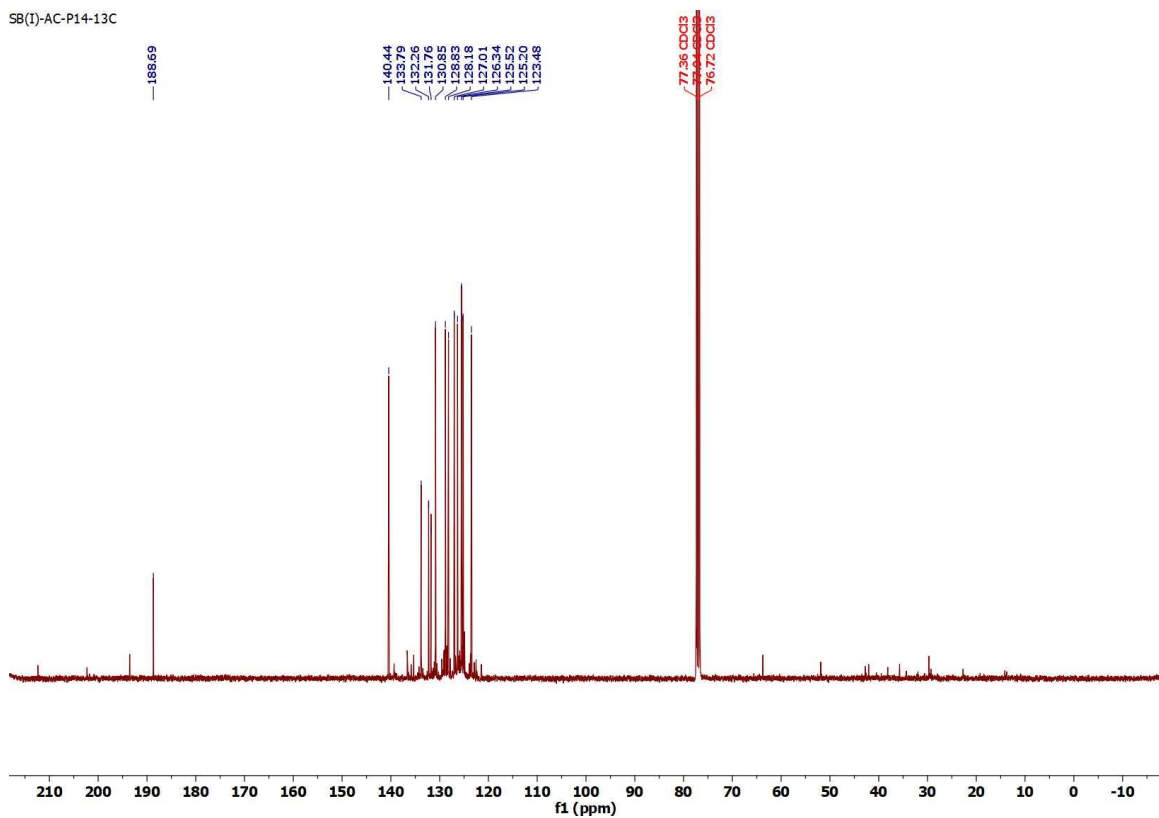

$^{13}\text{C}$  NMR spectrum of **P14** in  $\text{CDCl}_3$

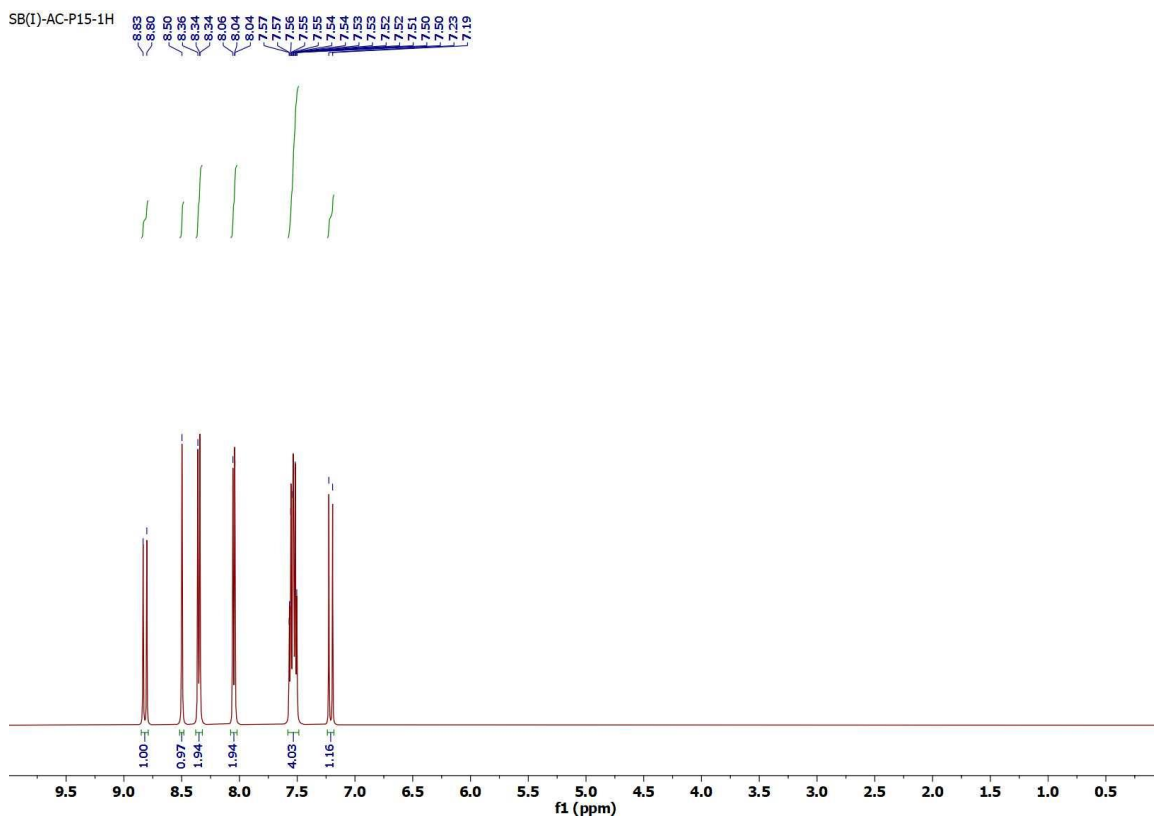
 $^1\text{H}$  NMR spectrum of **P<sub>15</sub>** in  $\text{CDCl}_3$ 
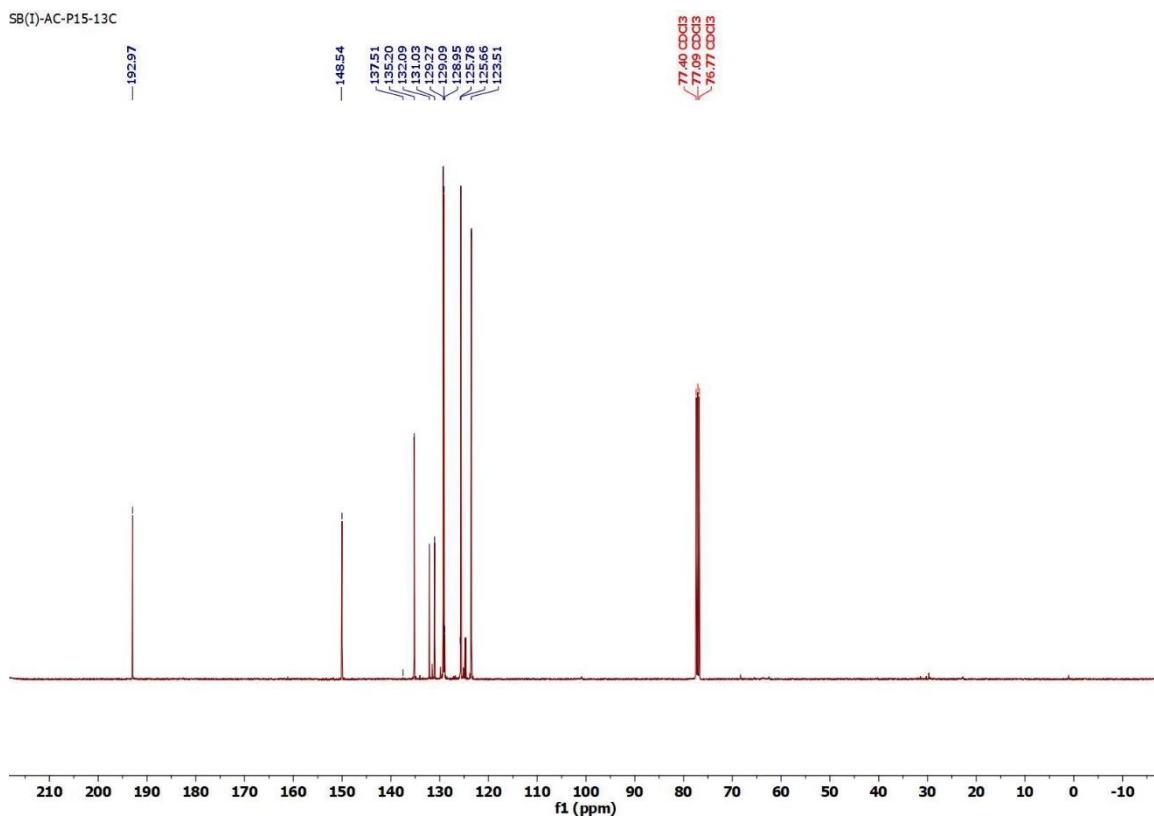
 $^{13}\text{C}$  NMR spectrum of **P<sub>15</sub>** in  $\text{CDCl}_3$

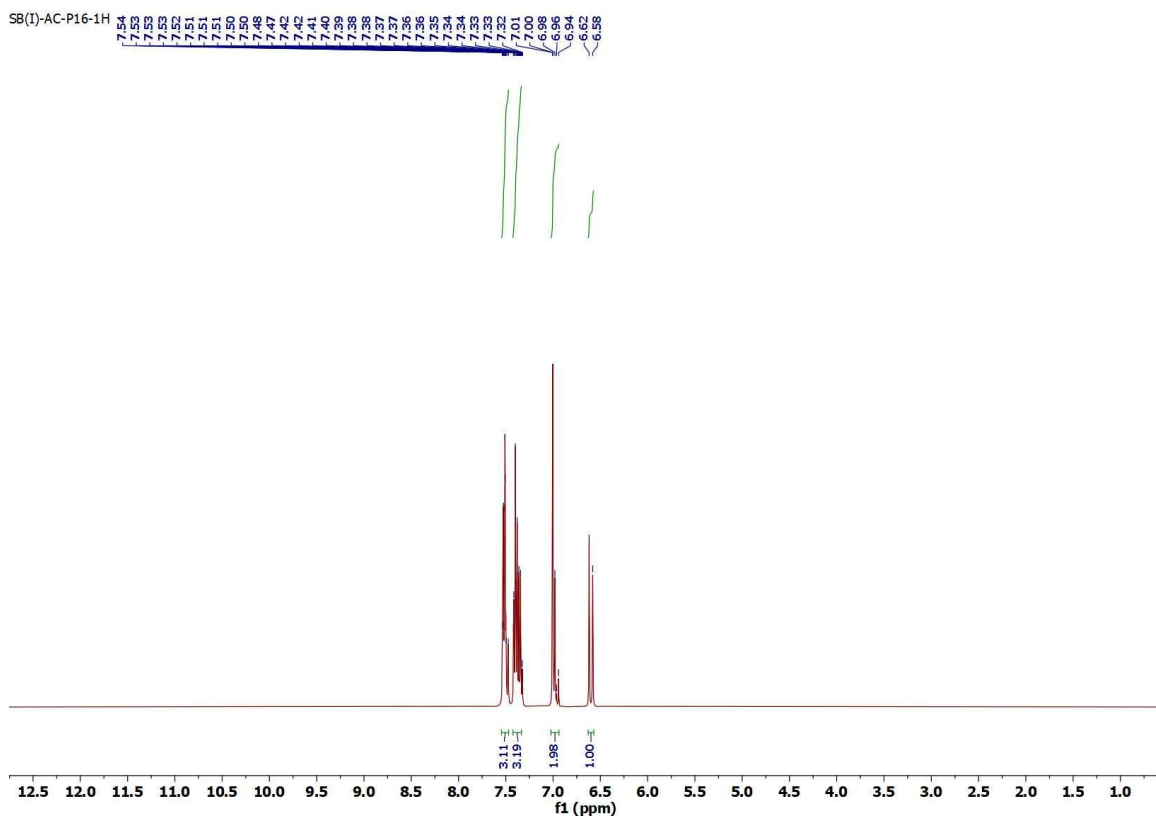

$^1\text{H}$  NMR spectrum of **P**<sub>16</sub> in  $\text{CDCl}_3$

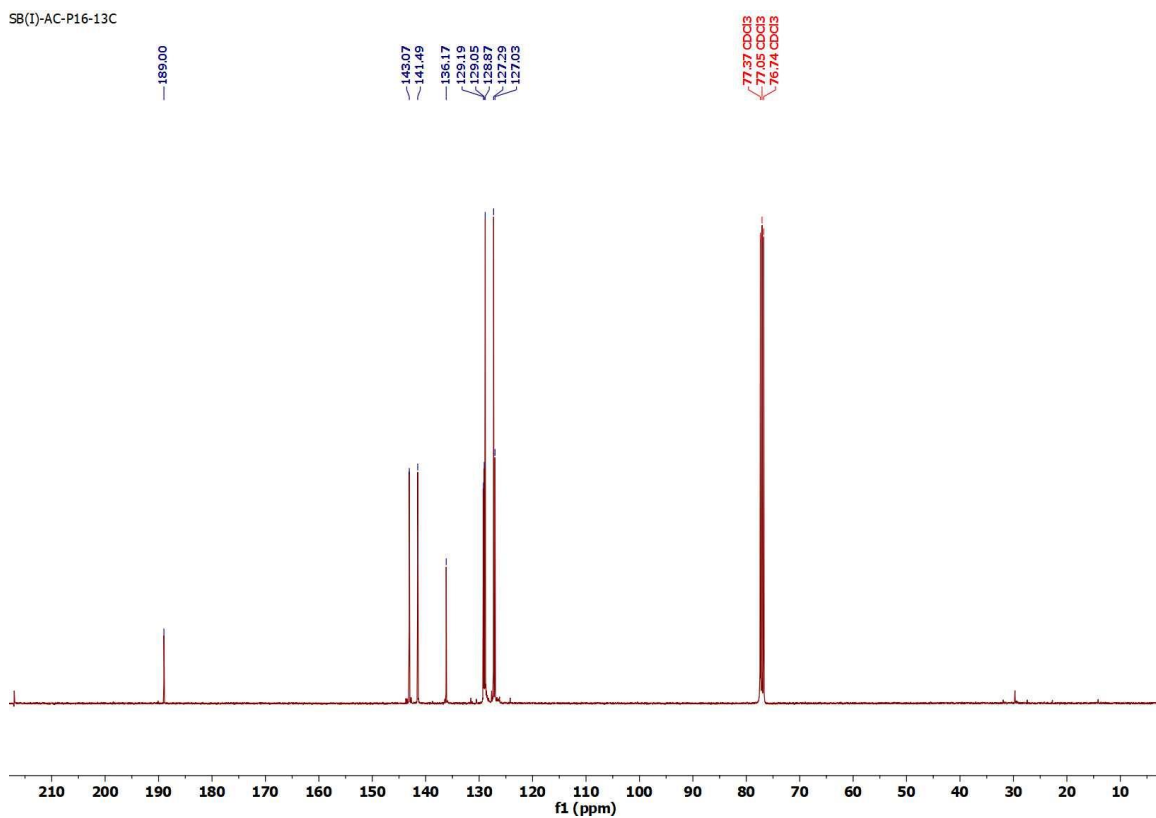

$^{13}\text{C}$  NMR spectrum of **P**<sub>16</sub> in  $\text{CDCl}_3$

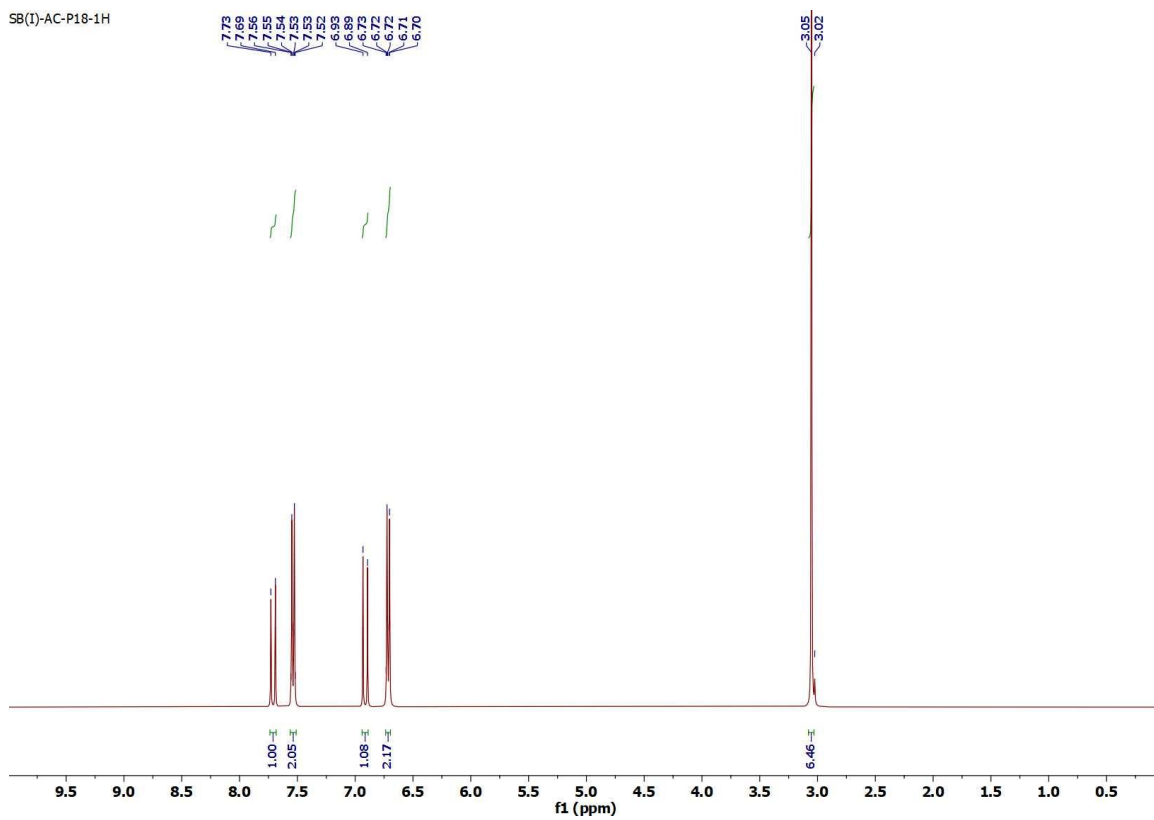

$^1\text{H}$  NMR spectrum of **P18** in  $\text{CDCl}_3$

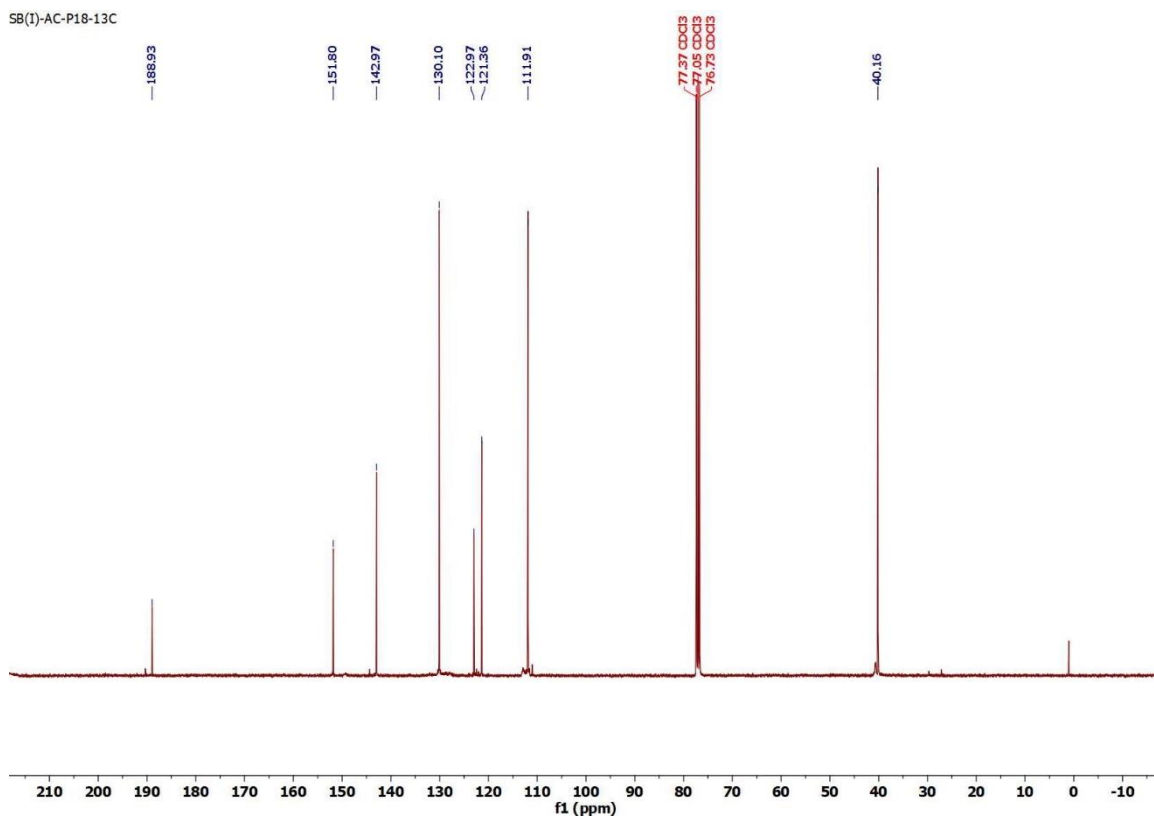

$^{13}\text{C}$  NMR spectrum of **P18** in  $\text{CDCl}_3$



SB(I)-AC-P19-1H

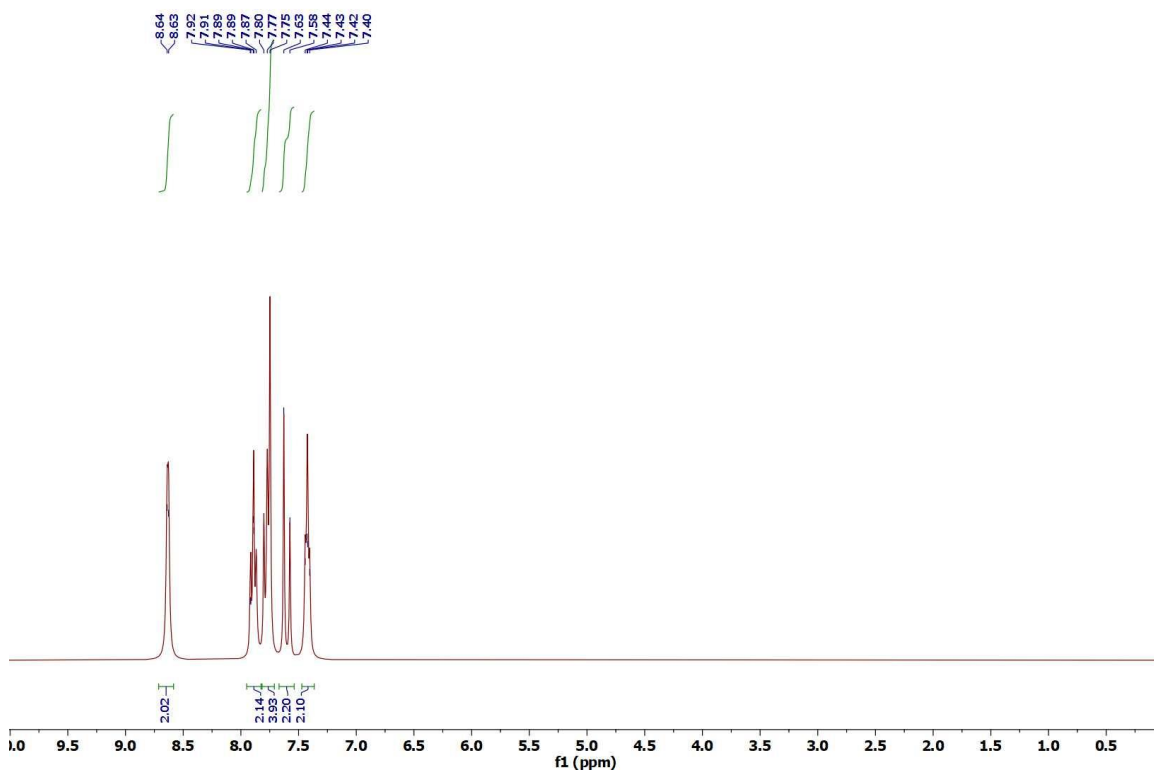 $^1\text{H}$  NMR spectrum of **P**<sub>19</sub> in  $\text{CD}_3\text{OD}$ 

SB(I)-AC-P19-13C

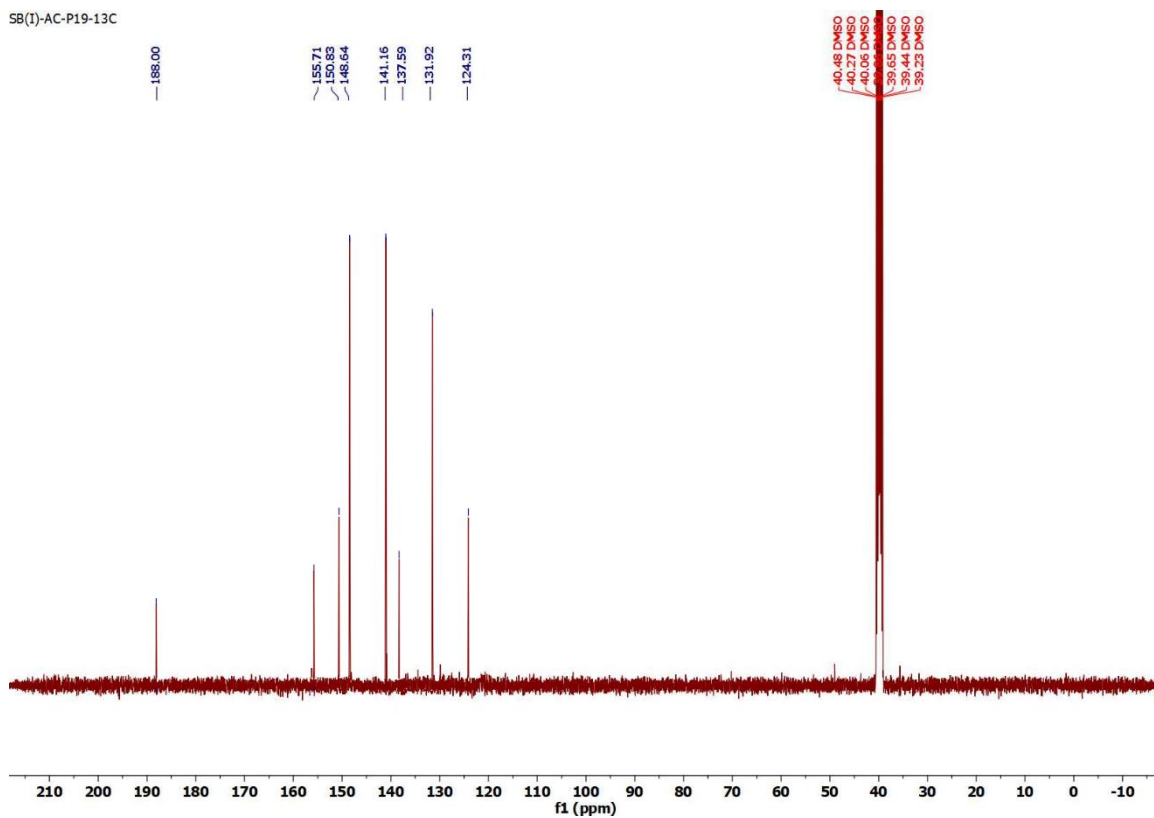 $^{13}\text{C}$  NMR spectrum of **P**<sub>19</sub> in  $\text{DMSO-d}_6$

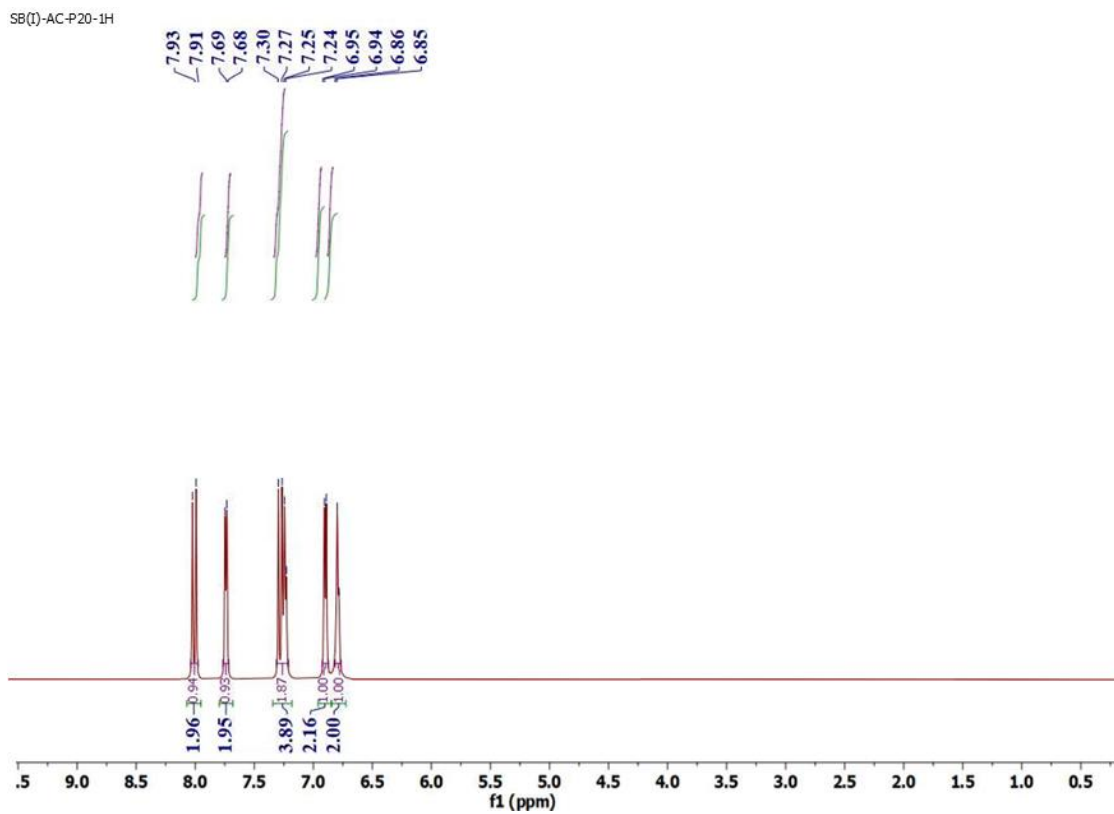

$^1\text{H}$  NMR spectrum of **P<sub>20</sub>** in  $\text{CDCl}_3$

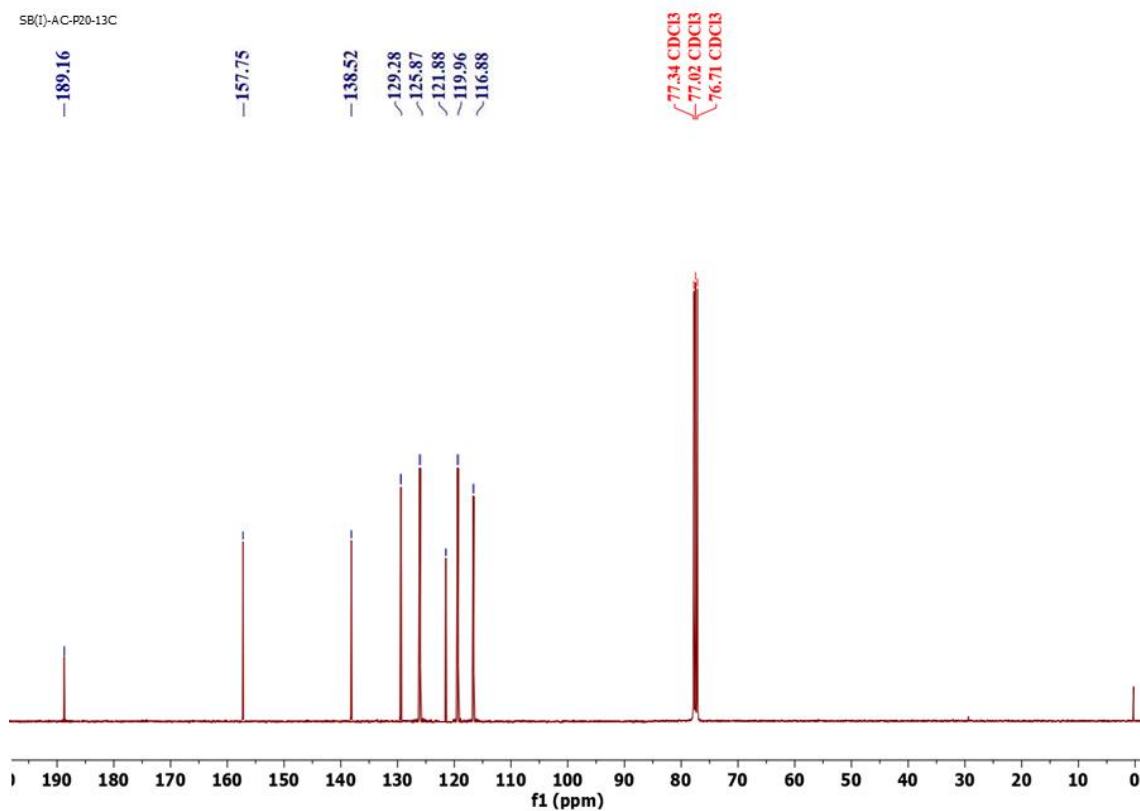

$^{13}\text{C}$  NMR spectrum of **P<sub>20</sub>** in  $\text{CDCl}_3$

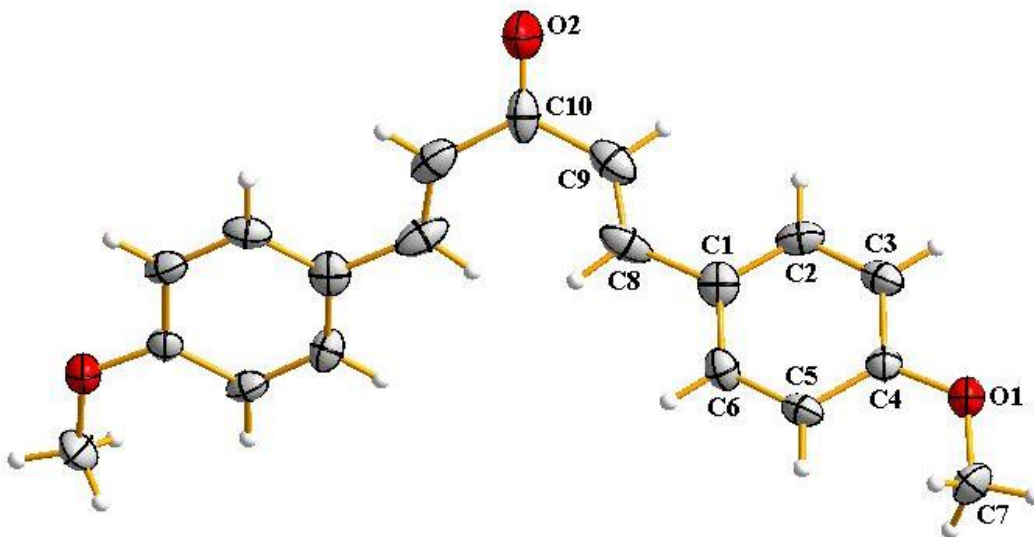

**Fig. S17** Molecular structure of 1,5-bis-(4-methoxyphenyl)-penta-1,4-(*E,E*)-dien-3-one (**P<sub>2</sub>**).

**Table S20** Selected bond distances and bond angles for **P<sub>2</sub>**

| Bond distances (Å) |           |           |           |
|--------------------|-----------|-----------|-----------|
| C1-C8              | 1.520(9)  | C10-O2    | 1.199(13) |
| C8-C9              | 1.272(10) | C4-O1     | 1.352(6)  |
| C9-C10             | 1.497(10) | C7-O1     | 1.432(9)  |
| Bond angles (°)    |           |           |           |
| C1-C8-C9           | 124.3(6)  | C9-C10-C9 | 126.0(12) |
| C8-C9-C10          | 125.7(8)  |           |           |

**Table S21** Comparison of different catalysts for the crossed-aldol reactions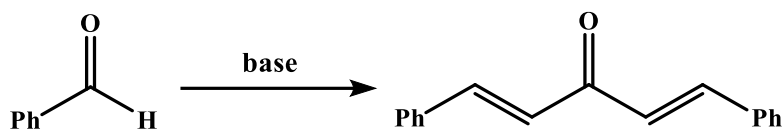

| Entry | Base loading | Condition          | TON  | TOF (h <sup>-1</sup> ) | Reference        |
|-------|--------------|--------------------|------|------------------------|------------------|
| 1     | 1 mmol       | 75 °C, 15 h        | 1.6  | 0.11                   | <b>27a</b>       |
| 2     | 2 mol%       | MW (1250 W), 3 min | 49.5 | 990*                   | <b>27b</b>       |
| 3     | 20 mol%      | 90 °C, 45 h        | 2.75 | 0.06                   | <b>27c</b>       |
| 4     | 0.5 mol%     | 83 °C, 6 h         | 160  | 26.67                  | <b>This work</b> |

\* This data is for a catalytic reaction carried out using micro-wave.

**Table S22** Crystallographic data for [Ru(L<sup>1</sup>)<sub>2</sub>(dmsO)<sub>2</sub>] and [Ru(L<sup>2</sup>)<sub>2</sub>(dmsO)<sub>2</sub>]

| Sample                     | [Ru(L <sup>1</sup> ) <sub>2</sub> (dmsO) <sub>2</sub> ]         | [Ru(L <sup>2</sup> ) <sub>2</sub> (dmsO) <sub>2</sub> ]          |
|----------------------------|-----------------------------------------------------------------|------------------------------------------------------------------|
| empirical formula          | C <sub>8</sub> H <sub>18</sub> O <sub>4</sub> S <sub>6</sub> Ru | C <sub>10</sub> H <sub>22</sub> O <sub>4</sub> S <sub>6</sub> Ru |
| Fw                         | 471.61                                                          | 499.77                                                           |
| Space group                | Orthorhombic, Ibca                                              | Orthorhombic, Pbca                                               |
| <i>a</i> (Å)               | 10.3358(10)                                                     | 11.6867(16)                                                      |
| <i>b</i> (Å)               | 11.1063(10)                                                     | 11.6375(16)                                                      |
| <i>c</i> (Å)               | 30.191(3)                                                       | 29.571(4)                                                        |
| α (°)                      | 90                                                              | 90                                                               |
| β (°)                      | 90                                                              | 90                                                               |
| γ (°)                      | 90                                                              | 90                                                               |
| <i>V</i> (Å <sup>3</sup> ) | 3465.7(6)                                                       | 4021.8(10)                                                       |
| <i>Z</i>                   | 8                                                               | 8                                                                |
| Crystal size (mm)          | 0.16 × 0.18 × 0.18                                              | 0.10 × 0.18 × 0.20                                               |
| <i>T</i> (K)               | 273                                                             | 273                                                              |
| μ (mm <sup>-1</sup> )      | 1.628                                                           | 1.410                                                            |
| R1 <sup>a</sup>            | 0.0380                                                          | 0.0385                                                           |
| wR2 <sup>b</sup>           | 0.1466                                                          | 0.1444                                                           |
| GOF <sup>c</sup>           | 1.23                                                            | 1.15                                                             |

$$^a R1 = \Sigma ||F_o| - |F_c|| / \Sigma |F_o|$$

$$^b wR2 = [\Sigma\{w(F_o^2 - F_c^2)^2\} / \Sigma\{w(F_o^2)\}]^{1/2}$$

$$^c GOF = [\Sigma(w(F_o^2 - F_c^2)^2) / (M - N)]^{1/2}, \text{ where } M \text{ is the number of reflections and } N \text{ is the number of parameters refined.}$$

**Table S23** Crystallographic data for [Ru(L<sup>3</sup>)<sub>2</sub>(dmsO)<sub>2</sub>] and [Ru(L<sup>4</sup>)<sub>2</sub>(dmsO)<sub>2</sub>]

| Sample                | [Ru(L <sup>3</sup> ) <sub>2</sub> (dmsO) <sub>2</sub> ]          | [Ru(L <sup>4</sup> ) <sub>2</sub> (dmsO) <sub>2</sub> ]         |
|-----------------------|------------------------------------------------------------------|-----------------------------------------------------------------|
| empirical formula     | C <sub>12</sub> H <sub>26</sub> O <sub>4</sub> S <sub>6</sub> Ru | C <sub>14</sub> H <sub>30</sub> O <sub>4</sub> RuS <sub>6</sub> |
| Fw                    | 527.82                                                           | 555.98                                                          |
| Space group           | Monoclinic, C2/c                                                 | Orthorhombic, Ibca                                              |
| <i>a</i> (Å)          | 13.9281(11)                                                      | 10.3525(7)                                                      |
| <i>b</i> (Å)          | 16.4456(13)                                                      | 11.1613(8)                                                      |
| <i>c</i> (Å)          | 9.3353(8)                                                        | 30.316(2)                                                       |
| α (°)                 | 90                                                               | 90                                                              |
| β (°)                 | 94.318(2)                                                        | 90                                                              |
| γ (°)                 | 90                                                               | 90                                                              |
| V (Å <sup>3</sup> )   | 2132.2(3)                                                        | 3502.93(40)                                                     |
| Z                     | 4                                                                | 8                                                               |
| Crystal size (mm)     | 0.16 × 0.22 × 0.24                                               | 0.14 × 0.18 × 0.22                                              |
| T (K)                 | 273                                                              | 273                                                             |
| μ (mm <sup>-1</sup> ) | 1.335                                                            | 1.618                                                           |
| R1 <sup>a</sup>       | 0.0186                                                           | 0.0404                                                          |
| wR2 <sup>b</sup>      | 0.1134                                                           | 0.0810                                                          |
| GOF <sup>c</sup>      | 1.05                                                             | 1.080                                                           |

$$^a R1 = \frac{\sum ||F_o| - |F_c||}{\sum |F_o|}$$

$$^b wR2 = [\frac{\sum \{w(F_o^2 - F_c^2)^2\}}{\sum \{w(F_o^2)\}}]^{1/2}$$

$$^c GOF = [\frac{\sum (w(F_o^2 - F_c^2)^2)}{(M-N)}]^{1/2}, \text{ where } M \text{ is the number of reflections and } N \text{ is the number of parameters refined.}$$

**Table S24** Crystallographic data for [Ru(L<sup>3</sup>)<sub>2</sub>(bpy)] and 1,5-Bis-(4-methoxyphenyl)-penta-1,4-(*E,E*)-dien-3-one (**P<sub>2</sub>**)

| Sample                     | [Ru(L <sup>3</sup> ) <sub>2</sub> (bpy)]                                       | <b>P<sub>2</sub></b>                           |
|----------------------------|--------------------------------------------------------------------------------|------------------------------------------------|
| empirical formula          | C <sub>18</sub> H <sub>22</sub> N <sub>2</sub> O <sub>2</sub> RuS <sub>4</sub> | C <sub>19</sub> H <sub>18</sub> O <sub>3</sub> |
| Fw                         | 527.70                                                                         | 294.33                                         |
| Space group                | Monoclinic, P2 <sub>1</sub> /n                                                 | Orthorhombic, Aba2                             |
| <i>a</i> (Å)               | 12.6625(4)                                                                     | 7.4066(5)                                      |
| <i>b</i> (Å)               | 11.4820(4)                                                                     | 34.011(2)                                      |
| <i>c</i> (Å)               | 16.5225(6)                                                                     | 6.1761(4)                                      |
| $\alpha$ (°)               | 90                                                                             | 90                                             |
| $\beta$ (°)                | 105.7030(10)                                                                   | 90                                             |
| $\gamma$ (°)               | 90                                                                             | 90                                             |
| <i>V</i> (Å <sup>3</sup> ) | 2312.56(14)                                                                    | 1555.8 (17)                                    |
| <i>Z</i>                   | 4                                                                              | 4                                              |
| crystal size (mm)          | 0.18 × 0.22 × 0.24                                                             | 0.05 × 0.14 × 0.24                             |
| <i>T</i> (K)               | 273                                                                            | 273                                            |
| $\mu$ (mm <sup>-1</sup> )  | 1.061                                                                          | 0.081                                          |
| R1 <sup>a</sup>            | 0.0281                                                                         | 0.1111                                         |
| wR2 <sup>b</sup>           | 0.1203                                                                         | 0.2520                                         |
| GOF <sup>c</sup>           | 0.975                                                                          | 1.445                                          |

$$^a R1 = \Sigma ||F_o| - |F_c|| / \Sigma |F_o|$$

$$^b wR2 = [\Sigma\{w(F_o^2 - F_c^2)^2\} / \Sigma\{w(F_o^2)\}]^{1/2}$$

$$^c GOF = [\Sigma(w(F_o^2 - F_c^2)^2) / (M - N)]^{1/2}, \text{ where } M \text{ is the number of reflections and } N \text{ is the number of parameters refined.}$$
